# Supplementary material for: Unexpected similarities between C9ORF72 and sporadic forms of ALS/FTD suggest a common disease mechanism
Source: eLife journal article supplement (doi:10.7554/elife.37754), 2018-07-13
Supplement: supp [file elife-37754-supp-v1.zip]

Archive with 12 entries (12 files):
- elife_poa_e37754_Figure_2_figure_supplement_1.pdf
- elife_poa_e37754_Figure_6_figure_supplement_1.pdf
- elife_poa_e37754_Figure_6_figure_supplement_5.pdf
- elife_poa_e37754_Figure_4_figure_supplement_1.pdf
- elife_poa_e37754_Transparent_Reporting_File.pdf
- elife_poa_e37754_Figure_6_figure_supplement_3.pdf
- elife_poa_e37754_Figure_4_figure_supplement_2.pdf
- elife_poa_e37754_Figure_6_figure_supplement_4.pdf
- elife_poa_e37754_Figure_1_figure_supplement_1.pdf
- elife_poa_e37754_Figure_6_figure_supplement_2.pdf
- elife_poa_e37754_Figure_5_figure_supplement_1.pdf
- elife_poa_e37754_Supplementary_file_1.xlsx
