# Supplementary material for: Unexpected similarities between C9ORF72 and sporadic forms of ALS/FTD suggest a common disease mechanism
Source: eLife journal article supplement (doi:10.7554/elife.37754), 2018-07-13
Supplement: supp [file elife-37754-supp-v1.zip › elife_poa_e37754_Figure_6_figure_supplement_1.pdf]

Figure 6 Fig. Supp. 1

chr7:143854142:143857100 TCAF1  
chr7:11062085:11102486 PHF14  
chr18:55229076:55232521 TCF4  
chr4:139072003:139073454 ELF2  
chr9:127682560:127684368 STXBP1  
chr9:36204179:36209267 CLTA  
chr5:162151753:162153093 GABRG2  
chr5:162149313:162151730 GABRG2  
chr5:87394484:87395044 CCNH  
chr2:172566933:172568741 PDK1  
chr7:44231054:44232822 CAMK2B  
chr5:98868635:98869754 CHD1  
chr1:39459832:39460632 MACF1  
chr2:206279592:206280550 ZDBF2  
chr6:145945637:145946233 SHPRH  
chr15:41475819:41476446 RTF1  
chr12:88053746:88054340 CEP290  
chr15:52600235:52601086 FAM214A  
chr11:63908304:63908877 MARK2  
chr7:74718941:74728786 GTF2I  
chr5:178622459:178623256 CLK4  
chr3:33408797:33409236 UBP1  
chr16:56498568:56499778 BBS2  
chr13:40749281:40754019 MRPS31  
chr1:9735615:9735885 CLSTN1  
chr3:20122804:20125905 KAT2B  
chr15:76947517:76948410 RCN2  
chr7:95772773:95804721 DYNC111  
chr9:85976735:85977363 NAA35  
chr14:50743529:50744243 NIN  
chr2:24762776:24768079 NCOA1  
chr1:36293935:36296583 THRAP3  
chr12:69370975:69390147 YEATS4  
chr15:56654234:56654385 ZNF280D  
chr15:56642997:56654198 ZNF280D  
chr3:62512768:62516059 CADPS  
chr12:69362907:69365633 YEATS4  
chr1:25244498:25245150 RSRP1  
chr12:21515270:21515669 GOLT1B  
chr2:95852196:95853709 ANKRD36C  
chrX:53083305:53084545 TSPYL2  
chr16:89873859:89883351 TCF25  
chr7:128817864:128821799 CCDC136  
chr7:128805901:128817758 CCDC136  
chr17:76744466:76754047 MFSD11  
chr6:28267213:28271854 ZSCAN26,RP5-874C20.8  
chr3:51362674:51374487 DOCK3  
chr2:151468756:151469711 RIF1  
chr4:139072039:139073454 ELF2  
chr15:52584944:52587056 FAM214A  
chr12:108129926:108195282 WSCD2  
chr6:89618031:89623410 ANKRD6  
chr1:58685251:58690340 MYSM1  
chr1:227048010:227069777 CDC42BPA  
chr18:55229076:55232509 TCF4  
chr22:40267036:40273425 TNRC6B  
chr1:39459249:39460632 MACF1  
chr1:41006094:41008659 CTPS1  
chr12:51687219:51688758 SCN8A  
chr7:143854142:143857074 TCAF1  
chr6:143462997:143470961 PEX3  
chr1:215577728:215579000 KCTD3  
chr13:31946181:31952495 EEF1DP3,FRY  
chr11:11842224:11884467 USP47  
chr17:17215316:17217069 RP11-45M22.4,FLCN  
chr1:84164422:84179177 PRKACB  
chr15:41475819:41476181 RTF1  
chr10:120890009:120900029 WDR11  
chr1:23050520:23055069 KDM1A  
chr3:101341779:101347872 SENP7  
chr22:21568377:21592861 UBE2L3  
chr20:58343799:58353432 RAB22A  
chr18:23466276:23473429 RIOK3  
chr17:47154864:47156913 CDC27  
chr12:111513539:111518249 ATXN2  
chr4:145110444:145112239 ABCE1  
chr3:193644105:193645728 OPA1  
chr18:2656261:2666870 SMCHD1  
chr7:6026961:6028918 EIF2AK1  
chr10:91953873:91957225 BTAF1  
chr15:65155856:65157746 CLPX  
chr14:96332410:96333688 ATG2B  
chr6:83914448:83919397 CYB5R4  
chr3:20122973:20125905 KAT2B  
chr15:76947517:76948338 RCN2  
chr7:95773638:95804721 DYNC111  
chr3:127576893:127579740 TPRA1  
chr3:179375341:179377344 MFN1  
chr14:23347731:23348161 SLC22A17,AL049829.1  
chr11:117189401:117190166 SIDT2  
chrX:53083305:53084532 TSPYL2  
chr21:32582415:32603161 TCP10L,AP000275.65,C21orf59  
chr12:69370975:69407160 YEATS4  
chr5:162149313:162153093 GABRG2  
chr7:128809644:128810139 CCDC136  
chr10:60076454:60080537 ANK3  
chr15:56658486:56666395 ZNF280D  
chr17:76744466:76744575 MFSD11  
chr3:51362674:51374469 DOCK3  
chr5:98868635:98869014 CHD1
