# Supplementary material for: Unexpected similarities between C9ORF72 and sporadic forms of ALS/FTD suggest a common disease mechanism
Source: eLife journal article supplement (doi:10.7554/elife.37754), 2018-07-13
Supplement: supp [file elife-37754-supp-v1.zip › elife_poa_e37754_Figure_6_figure_supplement_2.pdf]

chr4:82354154:82355304 HNRNPD  
chr4:82424883:82426037 HNRNPDL  
chr14:69769251:69770467 SRSF5  
chr5:179616218:179616869 HNRNPH1  
chr1:23971439:23971573 SRSF10  
chr12:54282874:54283812 HNRNPA1  
chrX:101391046:101391459 RPL36A,RPL36A-HNRNPH2  
chr12:120464122:120465627 SRSF9  
chr20:43458509:43459771 SRSF6  
chr2:70230854:70236079 TIA1,C2orf42  
chr10:68338642:68339140 HNRNPH3  
chrX:101408307:101411936 RPL36A-HNRNPH2,HNRNPH2  
chr11:62715379:62715500 BSCL2,HNRNPUL2-BSCL2,HNRNPUL2  
chr11:62691141:62691280 BSCL2,HNRNPUL2-BSCL2  
chr10:110297728:110298648 SMNDC1  
chr1:29160517:29181646 SRSF4  
chr1:70228555:70232268 SRSF11  
chr2:70227822:70229264 TIA1  
chr1:244862730:244863617 HNRNPU  
chr19:38840559:38843842 HNRNPL  
chr14:21263336:21269298 HNRNPC  
chr17:58005600:58005801 SRSF1  
chr17:76735158:76736154 SRSF2  
chr22:29273864:29278030 EWSR1  
chr19:8474244:8485603 HNRNPM  
chr16:31185179:31188325 FUS  
chr17:35824198:35834566 TAF15  
chr2:38733616:38746144 SRSF7  
chr9:83973399:83974517 HNRNPK  
chr11:62715607:62716989 HNRNPUL2-BSCL2,HNRNPUL2  
chr1:23338608:23344211 HNRNPR  
chr5:178209447:178210132 HNRNPAB  
chr2:177219314:177222060 HNRNPA3  
chr7:26197732:26200572 HNRNPA2B1  
chr19:41264798:41268223 HNRNPUL1
