# Supplementary material for: Unexpected similarities between C9ORF72 and sporadic forms of ALS/FTD suggest a common disease mechanism
Source: eLife journal article supplement (doi:10.7554/elife.37754), 2018-07-13
Supplement: supp [file elife_poa_e37754_Figure_4_figure_supplement_1.pdf › elife_poa_e37754_Figure_4_figure_supplement_1.pdf]

Figure 4 Fig. Supp. 1

nonALS  
SOD1ALS  
C9ALS

1 2 3 4 6 7 23 39 1 2 3 4 5 6 8 10 11 12 13 14 15

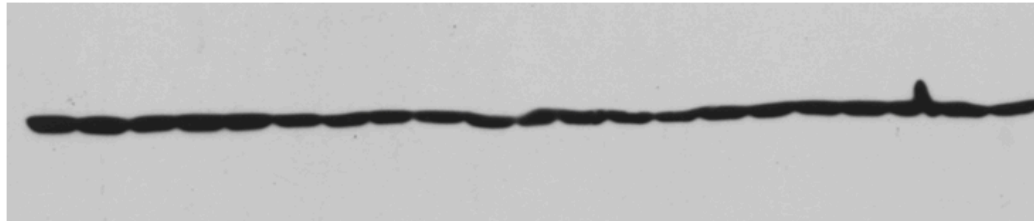

Cortex homogenate  
WB: Actin

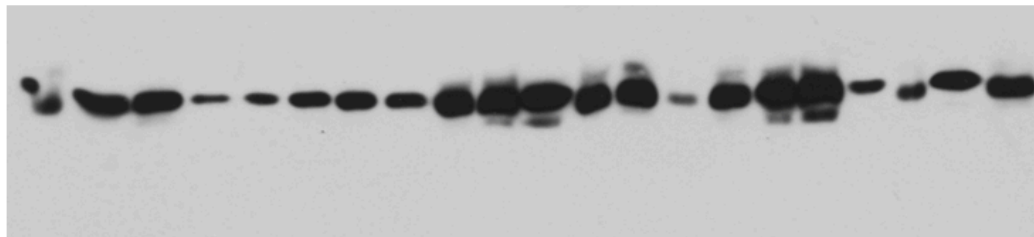

SI  
WB: hnRNP H

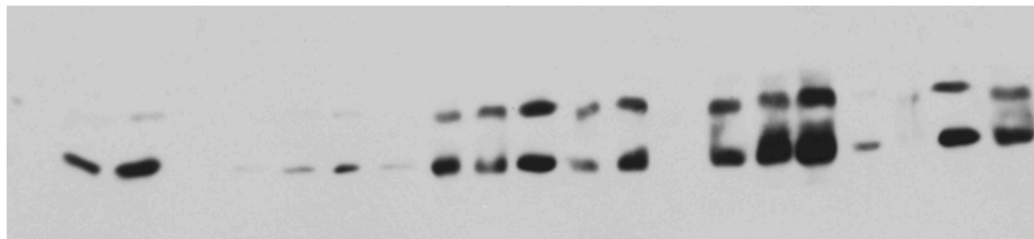

Strip  
membrane

hnRNP H

TDP-43

SI  
WB: TDP-43
