# Supplementary material for: Unexpected similarities between C9ORF72 and sporadic forms of ALS/FTD suggest a common disease mechanism
Source: eLife journal article supplement (doi:10.7554/elife.37754), 2018-07-13
Supplement: supp [file elife_poa_e37754_Supplementary_file_1.xlsx]

## Sheet: SuppTable1
Sample #	RNAseq ID	Tissue	Sex	Clinical diagnosis	Age at death	Disease duration	Like-C9?	% Insoluble hnRNP H	TDP-43 Pathology	Purkinje Cell loss	Known Mutation	Seq Group	Key
s1	CGND_HRA_00684	CBL, BA4	F	ALS	53	9 years	No	61.6	UNA	Confirmed	n/a	ALShigh	Sporadic ALS
s2	CGND_HRA_00685	CBL, BA4	F	ALS	64	2.5 years	Yes	86.2	Confirmed	Confirmed	n/a	ALShigh	FTD-MND
s3	CGND_HRA_00440	CBL, BA4	F	ALS	79	2 years	Yes	69.7	UNA	Confirmed	n/a	ALShigh	nonALS
s4	CGND_HRA_00686	CBL, BA4	M	ALS	67	1.5 years	No	71.2	UNA	Confirmed	n/a	ALShigh	SOD1ALS
s5	CGND_HRA_00687	CBL, BA4	F	ALS	77	2-2.5 years	Yes	62.4	UNA	Confirmed	n/a	ungrouped ALS	C9+
s6	CGND_HRA_00688	CBL, BA4	M	ALS	54	2-3 years	No	25.9	UNA	UNA	n/a	ALSlow
s7	CGND_HRA_00689	CBL, BA4	M	ALS	60	unknown	No	58.2	UNA	UNA	n/a	ALShigh
s8	CGND_HRA_00441	CBL, BA4	F	ALS	77	1.5 years	Yes	78.2	UNA	Confirmed	n/a	ALShigh
s9	CGND_HRA_00442	CBL, BA4	F	ALS	69	1.5 years	Yes	61.1	UNA	Not observed	n/a	ALShigh
s10	CGND_HRA_00443	CBL, BA4	M	ALS	73	2.5-3 years	Yes	59.9	UNA	Confirmed	n/a	ALShigh
s11	CGND_HRA_00444	CBL, BA4	M	ALS	56	1.5 years	Yes	72.3	UNA	Confirmed	n/a	ALShigh
s12	CGND_HRA_00690	CBL	F	ALS	79	3 years	No	UNA	UNA	UNA	n/a	ungrouped ALS
s13	CGND_HRA_00445	CBL	M	ALS	52	6.5 years	Yes	UNA	Confirmed	Confirmed	n/a	ungrouped ALS
s14	CGND_HRA_00691	CBL	F	ALS	74	2 years	No	UNA	UNA	UNA	n/a	ungrouped ALS
s15	CGND_HRA_00692	CBL	M	ALS	76	unknown	No	UNA	UNA	UNA	n/a	ungrouped ALS
s16	CGND_HRA_00446	CBL, BA4	M	ALS	60	2 years	Yes	69.4	UNA	Not observed	n/a	ALShigh
s17	CGND_HRA_00693	CBL	M	ALS	63	2 years	Yes	UNA	UNA	UNA	n/a	ungrouped ALS
s18	CGND_HRA_00694	CBL, BA4	M	ALS-FTD	58	1.5-2 years	Yes	54.9	UNA	UNA	n/a	ungrouped ALS
s19	CGND_HRA_00447	CBL, BA4	M	FTD-MND	50	4 years	Yes	89.6	UNA	Not observed	n/a	FTD
s20	CGND_HRA_00695	CBL, BA4	F	ALS	78	unknown	No	65.9	UNA	UNA	n/a	ALShigh
s21	CGND_HRA_00448	CBL	M	ALS	75	unknown	Yes	UNA	UNA	UNA	n/a	ungrouped ALS
s22	CGND_HRA_00449	CBL	M	ALS	73	3 years	n/a	UNA	UNA	UNA	n/a	ungrouped ALS
s24	CGND_HRA_00450	CBL, BA4	F	ALS	69	2 years	Yes	38.1	UNA	Not observed	n/a	ALSlow
s25	CGND_HRA_00697	CBL	M	ALS-FTD	75	9 years	No	UNA	UNA	UNA	n/a	ungrouped ALS
s26	CGND_HRA_00698	CBL	M	ALS-FTD, PD	85	2 years	No	UNA	UNA	UNA	I70V ANG	ungrouped ALS
s27		CBL	F	ALS-FTD	59	unknown	No	UNA	Confirmed	Confirmed	n/a
s28	CGND_HRA_00700_replicate1 CGND_HRA_00725_replicate2	CBL, BA4	F	ALS	76	unknown	No	61.2	Confirmed	Confirmed	n/a	ALShigh
s29	CGND_HRA_00701_replicate1 CGND_HRA_00727_replicate2	CBL, BA4	F	ALS	67	10 years	No	32.1	Confirmed	Not observed	n/a	ALSlow
s30	CGND_HRA_00702	CBL, BA4	M	ALS	69	12 years	No	53.6	Not observed	Confirmed	n/a	ALShigh
s31	CGND_HRA_00703	CBL, BA4	F	ALS	71	2 years	No	29.1	Confirmed	Confirmed	n/a	ALSlow
s32	CGND_HRA_00704	CBL, BA4	F	ALS	72	unknown	No	24.6	Confirmed	Confirmed	n/a	ALSlow
s33	CGND_HRA_00705	CBL, BA4	F	ALS	71	unknown	No	32.8	Confirmed	Confirmed	n/a	ungrouped ALS
s34	CGND_HRA_00451	CBL, BA4	M	ALS	56	2 years	No	15.9	Confirmed	Confirmed	n/a	ALSlow
s35		CBL, BA4	F	ALS	55	3 years	No	39.7	Confirmed	Not observed	n/a
s36		CBL, BA4	M	ALS	44	2-2.5 years	No	11.3	Confirmed	Confirmed	n/a
s38	CGND_HRA_00706	CBL, BA4	M	ALS	80	0.5-1 years	No	24.7	UNA	UNA	n/a	ALSlow
s39		CBL, BA4	F	ALS	32	2-3 years	n/a	53.3	UNA	UNA	A3V SOD1
s40		CBL, BA4	F	ALS	65	2 years	No	36.2	Confirmed	Not observed	n/a
s42	CGND-HRA-00722	CBL	M	ALS	80	unknown	n/a	UNA	UNA	UNA	n/a	ungrouped ALS
s43	CGND-HRA-00723	CBL	M	ALS	74	unknown	n/a	UNA	UNA	UNA	n/a	ungrouped ALS
s44	CGND-HRA-00724	CBL	M	ALS	65	unknown	n/a	UNA	UNA	UNA	n/a	ungrouped ALS
F2	CGND_HRA_00452	CBL, BA4	M	ALS-FTD	78	3 years	Yes	76.8	Confirmed	UNA	n/a	FTD
F3	CGND_HRA_00708	CBL, BA4	F	ALS-FTD	55	4 years	No	16.5	Confirmed	UNA	n/a	ungrouped FTD
F5	CGND_HRA_00454	CBL, BA4	F	FTD-MND	67	14 years	Yes	68.4	Confirmed	UNA	n/a	FTD
F6		CBL	F	ALS-FTD	52	3 years	Yes	UNA	UNA	UNA	n/a
F7	CGND_HRA_00709	CBL, BA4	M	FTD-MND	54	4 years	No	39.7	UNA	UNA	n/a	ungrouped FTD
F8		CBL, BA4	M	FTD-MND	74	11 years	Yes	65.6	UNA	UNA	n/a
F9	CGND_HRA_00455	CBL, BA4	M	FTD-MND	69	9 years	Yes	62.6	Confirmed	Confirmed	n/a	FTD
F10	CGND_HRA_00456	CBL, BA4	M	FTD-MND	57	6 years	Yes	88.0	TDP-43 negative MNI	Confirmed	n/a	FTD
F11	CGND_HRA_00457	CBL, BA4	M	FTD-MND	64	3 years	Yes	90.8	Confirmed	UNA	n/a	FTD
F12	CGND_HRA_00458	CBL, BA4	M	FTD-MND	58	10 years	Yes	79.6	Confirmed	UNA	n/a	FTD
F13	CGND_HRA_00459	CBL, BA4	F	FTD-MND	66	8 years	Yes	80.9	Confirmed	UNA	n/a	FTD
F14		CBL, BA4	F	FTD-MND	79	8 years	Yes	36.7	Confirmed	UNA	n/a
F15	CGND_HRA_00710	CBL, BA4	F	FTD-MND	66	3 years	Yes	61.6	Confirmed	UNA	n/a	ungrouped FTD
non1		CBL, BA4	M	Non-neurological control	60	n/a	n/a	27.5	n/a	n/a	n/a
non2		CBL, BA4	F	Non-neurological control	62	n/a	n/a	47.9	n/a	n/a	n/a
non3		CBL, BA4	F	Non-neurological control	54	n/a	n/a	47.4	n/a	n/a	n/a
non4		CBL, BA4	M	Non-neurological control	89	n/a	n/a	24.4	n/a	n/a	n/a
non5		CBL	M	Non-neurological control	84	n/a	n/a	UNA	n/a	n/a	n/a
non6	CGND_HRA_00206	CBL, BA4	F	Non-neurological control	54	n/a	n/a	14.9	n/a	n/a	n/a	Control
non7		BA4	M	Non-neurological control	62	n/a	n/a	32.9	n/a	n/a	n/a
non8		CBL	F	Non-neurological control	57	n/	n/a	UNA	n/a	n/a	n/a
non9	CGND_HRA_00721	CBL	F	Non-neurological control	90+	n/a	n/a	UNA	n/a	n/a	n/a	Control
non10	CGND_HRA_00077	CBL	F	Non-neurological control	90+	n/a	n/a	UNA	n/a	n/a	n/a	Control
non11	CGND_HRA_00197	CBL	F	Non-neurological control	70	n/a	n/a	UNA	n/a	n/a	n/a	Control
non12	CGND_HRA_00196	CBL	F	Non-neurological control	52	n/a	n/a	UNA	n/a	n/a	n/a	Control
non13	CGND_HRA_00753	CBL	M	Non-neurological control	89	n/a	n/a	UNA	n/a	n/a	n/a	Control
s23=SOD1	CGND_HRA_00696	CBL, BA4	F	ALS	52	unknown	n/a	24.1	UNA	UNA	L144F SOD1	SOD1
SOD2	CGND_HRA_00104	CBL	M	ALS	58	unknown	n/a	UNA	UNA	UNA	unknown	SOD1
SOD3	CGND_HRA_00170	CBL	M	ALS	47	unknown	n/a	UNA	UNA	UNA	unknown	SOD1
SOD4	CGND_HRA_00110	CBL	M	ALS	49	unknown	n/a	UNA	UNA	UNA	unknown	SOD1
SOD5	CGND_HRA_00076	CBL	M	ALS	68	unknown	n/a	UNA	UNA	UNA	A4V SOD1	SOD1
C91	CGND_HRA_00714	CBL, BA4	F	ALS	64	1-1.5 years	n/a	87.2	UNA	UNA	C9ORF72	C9
C92	CGND_HRA_00728	CBL, BA4	F	ALS	64	0.5 years	n/a	56	UNA	UNA	C9ORF72	C9
C93	CGND_HRA_00715	CBL, BA4	F	ALS	58	1-1.5 years	n/a	94.7	UNA	UNA	C9ORF72	C9
C94	CGND_HRA_00730	CBL, BA4	M	ALS-FTD	60	0.5-1 years	n/a	41.3	Confirmed	UNA	C9ORF72	C9
C95	CGND_HRA_00729	CBL, BA4	F	ALS	65	7-7.5 years	n/a	89.2	UNA	UNA	C9ORF72	C9
C96	CGND_HRA_00716	CBL, BA4	M	ALS	73	4.5 years	n/a	37.2	UNA	UNA	C9ORF72	C9
C97	CGND_HRA_00717	CBL	M	ALS	53	4 years	n/a	UNA	UNA	UNA	C9ORF72	C9
C98	CGND_HRA_00726	CBL, BA4	M	ALS	59	1 year	n/a	81.8	UNA	UNA	C9ORF72	C9
C99=s37	CGND_HRA_00718	CBL, BA4	M	ALS	70	<2 years	n/a	15.8	UNA	UNA	C9ORF72	C9
C910=F4	CGND_HRA_00453	CBL, BA4	F	FTD	75	9 years	n/a	95.3	UNA	UNA	C9ORF72	ungrouped FTD
C911	CGND_HRA_00719	CBL, BA4	M	ALS-FTD	73	2 years	n/a	89.5	UNA	UNA	C9ORF72	C9
C912	CGND_HRA_00720	CBL, BA4	F	ALS	57	1 year	n/a	33.2	UNA	UNA	C9ORF72	C9
C913=s41	CGND_HRA_00713	CBL, BA4	F	ALS-FTD	68	6 years	n/a	27.0	Confirmed	Confirmed	C9ORF72	C9
C914		CBL, BA4	M	ALS-FTD	59	2 years	n/a	76.1	UNA	UNA	C9ORF72
C915		BA4	M	ALS	44	4 years	n/a	73.5	UNA	UNA	C9ORF72
C916=F1	CGND_HRA_00707	CBL, BA4	F	ALS-FTD	68	6 years	n/a	40.3	UNA	UNA	C9ORF72	ungrouped FTD
C920	CGND_HRA_00074	CBL	F	ALS	unknown	unknown	n/a	UNA	UNA	UNA	C9ORF72	C9
C921	CGND-HRA-00319	CBL	M	ALS	67	unknown	n/a	UNA	UNA	UNA	C9ORF72	ungrouped ALS
C922	CGND-HRA-00295	CBL	F	FTD, AD	72	unknown	n/a	UNA	UNA	UNA	C9ORF72	ungrouped FTD
C923	CGND-HRA-00357	CBL	F	ALS	61	unknown	n/a	UNA	UNA	UNA	C9ORF72	ungrouped ALS
Note: CBL= cerebellum; BA4= Brodmann Area 4, motor cortex; MND= motor neuron disease; PD= Parkinson's Disease; AD= Alzheimer's Disease; n/a= not applicable; UNA= unavailable; MNI= motor neuron inclusion

## Sheet: SuppTable2
Junction	ALShigh	ALSlow	C9	FTD
chr2:159762993:159767284 MARCH7	-0.209303	0	-0.259325	-0.807695
chr14:69769251:69770467 SRSF5	0.292486	0	0.199317	0.736878
chr12:88053746:88055576 CEP290	-0.271176	0	-0.285663	-0.710337
chr3:5208263:5211120 EDEM1	-0.378219	0	-0.429013	-0.709037
chr8:106270367:106359476 RP11-395G23.3,OXR1	0.216579	0	0.266398	0.683686
chr5:172057473:172060967 STK10	0	0	0	-0.664925
chr5:172057473:172061139 STK10	0	0	0	0.664925
chr2:241723271:241724989 ING5	0.190648	0	0.218064	0.638533
chr1:95117617:95143891 TMEM56,TMEM56-RWDD3	0.171815	0	0.335373	0.635388
chr1:95118091:95143891 TMEM56,TMEM56-RWDD3	-0.171815	0	-0.335373	-0.635388
chr16:15086258:15091315 RRN3	-0.310497	0	-0.303704	-0.629577
chr2:97164311:97167577 ANKRD36	-0.215944	0	-0.295349	-0.61954
chr19:2037829:2040134 MKNK2	-0.231535	0	-0.291921	-0.613626
chr19:2039856:2040134 MKNK2	0.231535	0	0.291921	0.613626
chr8:38279681:38281467 WHSC1L1	-0.31649	0	-0.34814	-0.606655
chr8:38279681:38281500 WHSC1L1	0.31649	0	0.34814	0.606655
chr19:1272051:1274307 CIRBP	-0.121998	0	-0.178221	-0.606054
chr7:96688966:96694798 SHFM1	0.212254	0	0.246543	0.599588
chrY:2975654:2977940 ZFY	-0.342369	0	-0.282679	-0.59613
chr17:37519071:37520538 SYNRG	-0.190633	0	-0.273022	-0.5895
chr10:119751156:119781635 INPP5F	0.134453	0	0.184564	0.588432
chr17:67736754:67737508 NOL11	-0.170375	0	-0.161893	-0.582412
chr2:60794191:60794964 PAPOLG	-0.249159	0	-0.20376	-0.581245
chr12:6678460:6678946 ZNF384	-0.190573	0	-0.190516	-0.576802
chrX:55722285:55729294 RRAGB	-0.150487	0	-0.21134	-0.576387
chr10:22318306:22318959 COMMD3,COMMD3-BMI1	-0.131093	0	-0.105778	-0.575792
chr4:116928452:116952660 NA	0	0	-0.250676	-0.570663
chrX:135577295:135579788 INTS6L	0.260508	0	0	0.570223
chrX:135577427:135579788 INTS6L	-0.260508	0	0	-0.570223
chr14:77243056:77245940 TMEM63C	0	0	-0.106919	-0.56878
chr19:1272051:1272427 CIRBP	0.130431	0	0.173853	0.566133
chr15:50592626:50593617 TRPM7	0	0	0.274664	0.561753
chr6:33441759:33442889 SYNGAP1	-0.118313	0	-0.165749	-0.558433
chr8:109339390:109340444 ENY2	-0.213051	0	-0.185409	-0.557159
chr5:178618778:178623256 CLK4	0	0	-0.173821	-0.550645
chr1:113700949:113704081 PHTF1	0.312131	0	0.175102	0.549871
chr14:64950414:64950943 RAB15	0	0	0	-0.549327
chr14:64950414:64951074 RAB15	0	0	0	0.549327
chr1:7785586:7788045 PER3	-0.14599	0	-0.125159	-0.547793
chr9:37854982:37860048 DCAF10	0	0	0	-0.547563
chr22:38248019:38272884 TMEM184B	0.134011	0	0.24719	0.543644
chr10:15109215:15109702 NMT2	0.149593	0	0	0.540265
chr1:156236483:156242553 PMF1,PMF1-BGLAP,BGLAP	-0.188197	0	-0.252597	-0.538518
chr11:63819002:63826928 C11orf84	0.259133	0	0.292066	0.535386
chr18:79904183:79919184 PQLC1	0.286228	0	0.216636	0.534506
chrX:40071159:40072349 BCOR	-0.311887	0	-0.305106	-0.533764
chr17:64822393:64824625 PLEKHM1P1	0	0	0.146798	0.52918
chr3:121807443:121826051 IQCB1	-0.107538	0	-0.153547	-0.528842
chr3:38236961:38242743 OXSR1	0	0	0.187155	0.527869
chr8:109339390:109340489 ENY2	0.221188	0	0.185803	0.527709
chr8:106270367:106271806 RP11-395G23.3,OXR1	-0.13244	0	-0.119216	-0.525953
chr4:145110444:145112239 ABCE1	-0.100343	0	-0.137146	-0.525238
chr2:61311910:61314585 USP34	0.202625	0	0.265017	0.525124
chr16:67169101:67169631 HSF4	0	0	0	-0.522998
chr19:7981186:7991644 ELAVL1	0.127034	0	0.126529	0.5213
chr5:6620298:6623214 NSUN2	-0.194382	0	-0.17682	-0.520978
chr11:63905043:63908877 MARK2	-0.223806	0	-0.19962	-0.517371
chr17:60075833:60076130 HEATR6	0	0	-0.199975	-0.516337
chr1:160283109:160285055 PEX19,RP11-574F21.3	-0.183312	0	-0.183344	-0.513979
chr7:143854142:143857074 TCAF1	-0.203744	0	-0.209066	-0.51362
chr7:143854142:143857100 TCAF1	0.203744	0	0.209066	0.51362
chr1:70228555:70232268 SRSF11	-0.175071	0	-0.16516	-0.512832
chr3:113008430:113011045 NEPRO	-0.185399	0	-0.16355	-0.512554
chr12:111457359:111470108 ATXN2	-0.187674	0	-0.197817	-0.512105
chr16:57213946:57216904 RSPRY1	-0.116712	0	0	-0.51153
chr7:11062085:11111350 PHF14	-0.139237	0	-0.222678	-0.511524
chr6:143462997:143470961 PEX3	-0.128176	0	-0.127281	-0.509568
chr7:11062085:11102486 PHF14	0.159072	0	0.236984	0.508348
chr2:24275849:24286212 ITSN2	-0.16987	0	-0.247866	-0.503985
chr11:6218150:6218558 FAM160A2	-0.124235	0	-0.106819	-0.501042
chr11:6218150:6218600 FAM160A2	0.124235	0	0.106819	0.501042
chr1:156236483:156239548 PMF1,PMF1-BGLAP,BGLAP	0.187166	0	0.253711	0.499783
chr3:9433950:9434277 SETD5	-0.254769	0	-0.247646	-0.499242
chr17:73203793:73206154 COG1	-0.0809624	0	-0.100714	-0.499111
chr9:97326669:97330154 RP11-23J9.4,CCDC180	-0.196938	0	-0.1315	-0.498611
chr4:109717713:109729602 PLA2G12A	-0.19373	0	-0.13938	-0.496625
chr4:101026061:101032267 PPP3CA	-0.179811	0	-0.162808	-0.495477
chr10:122228008:122237395 TACC2	0	0	-0.148809	-0.492964
chr4:43763775:43764462 NA	0.194587	0	0	0.49106
chr20:37236709:37241303 RPN2	0	0	-0.192591	-0.490936
chr8:73027052:73032042 TERF1	0	0	0	-0.490816
chr22:31449531:31454144 EIF4ENIF1	-0.094122	0	-0.100157	-0.487432
chr3:97788119:97798024 ARL6	-0.161587	0	-0.192428	-0.484511
chr2:97560860:97584944 ANKRD36B	-0.173568	0	-0.119249	-0.483488
chr3:65357132:65361199 MAGI1	0	0	0	-0.481848
chr9:34614768:34617885 DCTN3	0	0	0	-0.481419
chr1:203045987:203048227 PPFIA4	0	0	-0.09833	-0.478072
chr4:82424883:82426037 HNRNPDL	0.216031	0	0.195265	0.477301
chr19:10830378:10832304 DNM2	0	0	0	-0.475535
chr9:97685040:97693649 XPA	-0.114481	0	-0.106238	-0.475534
chr12:122489463:122492715 ZCCHC8	-0.104819	0	-0.121704	-0.475282
chr4:15686462:15687001 FAM200B	0.140075	0	0	0.47416
chrX:16832742:16837593 TXLNG	-0.0219675	0	-0.0516582	-0.473709
chr2:159759335:159762880 MARCH7	0.113477	0	0.174398	0.473536
chr2:159759358:159762880 MARCH7	-0.113477	0	-0.174398	-0.473536
chr1:85258722:85259358 C1orf52	-0.200579	0	-0.177208	-0.473074
chr3:15052633:15053291 MRPS25	-0.102631	0	-0.151444	-0.472642
chr3:15052633:15053380 MRPS25	0.102631	0	0.151444	0.472642
chr4:82894847:82900077 THAP9-AS1,SEC31A	-0.140263	0	0	-0.47149
chr3:184386159:184386845 CHRD	-0.125021	0	-0.149362	-0.468546
chr15:40389929:40391949 KNSTRN	0	0	0	-0.467916
chr13:102766580:102768260 TEX30	0	0	-0.144374	-0.467451
chr18:63403826:63410290 VPS4B	-0.0981592	0	-0.166682	-0.465266
chr13:31141259:31145563 HSPH1	-0.0785794	0	-0.196544	-0.464435
chr3:113506605:113514897 SPICE1	-0.181218	0	-0.244083	-0.464175
chr3:113506605:113515080 SPICE1	0.181218	0	0.244083	0.464175
chr2:70989816:70993696 AC007040.11,TEX261	-0.0680773	0	-0.08636	-0.462861
chr14:66965325:67023633 GPHN	-0.147484	0	-0.161989	-0.458384
chr3:33576275:33581821 CLASP2	-0.178851	0	-0.149374	-0.457817
chr1:16315435:16316437 FBXO42	-0.199674	0	-0.240857	-0.456339
chr13:19670363:19671206 MPHOSPH8	0.27256	0	0.202696	0.454043
chr15:99690428:99706729 MEF2A	0	0	0	-0.452805
chr19:14480778:14491656 GIPC1	-0.0981164	0	0	-0.452448
chr9:146158:152034 CBWD1	0	0	0	0.452325
chr1:204532246:204538209 MDM4	-0.105363	0	0	-0.452143
chr6:116571655:116580295 RWDD1	-0.140524	0	-0.114263	-0.451977
chr16:3532841:3536122 CLUAP1	0	0	-0.193037	-0.450484
chr11:43889828:43901516 ALKBH3	-0.223641	0	0	-0.448002
chr13:110642521:110644385 CARS2	-0.216519	0	-0.216647	-0.445368
chr3:43081536:43105836 POMGNT2	-0.189199	0	-0.146115	-0.444891
chr5:87394484:87395044 CCNH	0.279434	0	0.278888	0.443713
chr2:95935644:95938987 ANKRD36C	-0.18252	0	-0.2024	-0.44317
chr15:56704267:56707263 ZNF280D	-0.21326	0	-0.21846	-0.44198
chr6:56463764:56466078 DST	-0.127652	0	-0.156514	-0.441493
chr3:33402904:33409236 UBP1	0	0	-0.167361	-0.441431
chr4:122274436:122279775 KIAA1109	-0.13863	0	-0.134469	-0.440806
chr2:159762993:159764626 MARCH7	0.177346	0	0.139532	0.439324
chr3:9433950:9434334 SETD5	0.222366	0	0.21873	0.439268
chr3:142183049:142185929 GK5	-0.0345444	0	-0.162057	-0.437904
chr10:37971807:37976072 ZNF25	-0.169532	0	-0.185909	-0.437247
chr3:45826332:45828439 LZTFL1	0	0	-0.0743918	-0.436877
chr9:121090405:121096422 CNTRL	-0.18658	0	-0.232319	-0.436782
chr7:99909660:99919009 TRIM4	-0.178092	0	-0.170243	-0.43628
chr11:113827360:113829197 USP28	-0.22157	0	-0.214514	-0.435908
chr3:142185989:142186452 GK5	0	0	0	-0.435696
chr4:13587771:13590386 BOD1L1	-0.0731243	0	-0.0858382	-0.434986
chr2:39035310:39051144 SOS1	-0.0485125	0	-0.116423	-0.434731
chr10:123162828:123163820 BUB3	0.209353	0	0.225425	0.434484
chr10:123162828:123165047 BUB3	-0.209353	0	-0.225425	-0.434484
chr22:19975757:19977415 ARVCF	-0.0803601	0	-0.103	-0.433947
chr1:16315435:16352255 FBXO42	0.204525	0	0.240637	0.433522
chr3:5210248:5211120 EDEM1	0.251544	0	0.264043	0.433481
chr14:100137644:100141180 EVL	-0.112826	0	-0.139183	-0.433234
chr8:42338685:42344953 POLB	0	0	0	-0.433126
chr1:155727738:155729208 DAP3	-0.0675454	0	-0.0683408	-0.431671
chr1:203045987:203046248 PPFIA4	0	0	0.12954	0.431037
chr9:113178801:113182766 FKBP15	0	0	0	-0.430687
chr9:113178801:113182796 FKBP15	0	0	0	0.430687
chr17:27306882:27307744 WSB1	0	0	0.108671	0.430561
chr1:1402256:1405809 MRPL20	0	0	0.131154	0.430358
chr20:3800498:3800971 CDC25B	-0.0555481	0	-0.0575766	-0.42998
chr13:51379572:51383329 INTS6	-0.147506	0	-0.177257	-0.429675
chr4:2639859:2646685 FAM193A	0.10411	0	0.149057	0.428479
chr1:86354859:86358787 ODF2L	-0.0948291	0	-0.139318	-0.427965
chr7:72829783:72831602 SBDSP1	-0.140228	0	-0.154074	-0.42777
chr16:11768501:11770783 ZC3H7A	-0.129099	0	-0.129578	-0.422777
chr2:219228053:219229535 ATG9A	-0.133971	0	-0.0898087	-0.422727
chr1:25243633:25245150 RSRP1	-0.309271	0	-0.252238	-0.420491
chr5:87392904:87395044 CCNH	-0.250894	0	-0.222391	-0.420297
chr7:92042771:92045008 AKAP9	-0.154737	0	-0.215966	-0.420043
chr17:17215316:17217069 RP11-45M22.4,FLCN	-0.0992197	0	-0.149964	-0.419912
chr17:58305643:58306342 TSPOAP1	0	0	-0.083505	-0.419689
chr3:141876910:141903620 ATP1B3	-0.141328	0	-0.1602	-0.419477
chr20:35632025:35632311 CPNE1	-0.0889669	0	-0.113315	-0.418768
chr11:64360592:64360821 RPS6KA4	-0.148656	0	0	-0.417531
chr11:64360592:64361134 RPS6KA4	0.148656	0	0	0.417531
chr15:25078995:25081091 SNHG14	-0.119178	0	-0.15107	-0.417328
chr22:38248019:38272499 TMEM184B	-0.102153	0	-0.193626	-0.417316
chr22:31327309:31335692 PATZ1	0	0	0	-0.416881
chr1:160224549:160225591 DCAF8,RP11-574F21.3	-0.125884	0	0	-0.416204
chr2:97154741:97162099 ANKRD36	-0.0406516	0	-0.0885919	-0.415991
chr6:83120791:83122863 DOPEY1	-0.0443781	0	-0.102983	-0.415697
chr3:197624197:197627780 AC024560.3	0	0	-0.00263095	0.415637
chr19:7981186:7982672 ELAVL1	-0.128884	0	-0.1032	-0.415584
chr1:2391958:2395784 RER1	0	0	0	0.414464
chr12:72255774:72271823 TRHDE-AS1	-0.155269	0	-0.122812	-0.41428
chr3:52617538:52627273 PBRM1	0	0	0	-0.412781
chr15:61945882:61947193 VPS13C	-0.133695	0	-0.122717	-0.412431
chr14:30559272:30586718 G2E3	-0.147074	0	-0.162768	-0.410936
chr2:151468756:151469711 RIF1	-0.180142	0	-0.232278	-0.409221
chr1:219173981:219179147 LYPLAL1	0.135157	0	0	0.409112
chr1:219174304:219179147 LYPLAL1	-0.135157	0	0	-0.409112
chrX:11760937:11762130 MSL3	-0.0812542	0	-0.121332	-0.408877
chr9:127682560:127690775 STXBP1	-0.160373	0	-0.159608	-0.408728
chr8:56211837:56214598 CHCHD7	-0.235805	0	-0.143032	-0.40866
chr3:32530328:32532986 DYNC1LI1	-0.0728718	0	-0.0771548	-0.408438
chr2:233354674:233388257 DGKD	0.059611	0	0.143734	0.408181
chr15:78971934:78980620 RASGRF1	0	0	0	-0.407415
chr14:69769251:69769511 SRSF5	-0.144225	0	-0.127691	-0.407361
chr17:60073886:60076130 HEATR6	0	0	0.136224	0.407089
chr18:47136449:47137235 HDHD2,RP11-49K24.6	0	0	-0.159434	-0.406979
chr13:19677823:19730239 PSPC1	-0.136131	0	0	-0.406471
chr5:103104846:103108569 GIN1	-0.0883105	0	-0.121705	-0.406203
chr2:148483436:148485742 MBD5	0	0	0	0.40478
chr2:148484135:148485742 MBD5	0	0	0	-0.40478
chr19:53122743:53132749 ZNF415	0	0	-0.129916	-0.404047
chr2:134946146:134947736 CCNT2	0.187206	0	0	0.403405
chr2:134946465:134947736 CCNT2	-0.187206	0	0	-0.403405
chr11:113805046:113808298 USP28	-0.0684078	0	-0.129851	-0.402954
chr10:68483588:68487144 DNA2,SLC25A16	0.115251	0	0.162547	0.402767
chr14:45096228:45096887 PRPF39	-0.160421	0	-0.197295	-0.401795
chr6:112081207:112086556 TUBE1	-0.114878	0	0	-0.401403
chr8:78666164:78678563 ZC2HC1A	-0.0406042	0	-0.0788348	-0.400957
chrX:153558303:153559729 ATP2B3	0.169846	0	0.130689	0.400728
chr9:35790340:35799618 NPR2	-0.128535	0	-0.157236	-0.398913
chr9:35794103:35799618 NPR2	0.128535	0	0.157236	0.398913
chrX:48575667:48576314 RBM3	0.18922	0	0.22673	0.398818
chr10:35071339:35089896 CUL2	-0.119384	0	-0.183207	-0.398754
chr14:23566419:23567111 AP1G2	0	0	-0.120275	-0.397689
chr8:42319421:42320735 IKBKB	0	0	-0.169719	-0.397678
chr3:53673126:53702641 CACNA1D	0	0	0	0.397173
chr3:53673816:53702641 CACNA1D	0	0	0	-0.397173
chr4:169561554:169561832 NEK1	-0.122691	0	-0.0938043	-0.396754
chr1:39459249:39460632 MACF1	-0.207611	0	-0.225103	-0.396375
chr4:119455133:119460183 RP11-33B1.1	0.0732991	0	0.10131	0.395315
chr4:119212873:119217550 USP53	0	0	-0.125063	-0.395245
chr3:58130908:58132808 FLNB	-0.196602	0	0	-0.39511
chr1:46572167:46576575 MKNK1	-0.111413	0	-0.156944	-0.393449
chr5:126832801:126836223 LMNB1	0.139773	0	0.164319	0.393337
chr5:126832801:126853562 LMNB1	-0.139773	0	-0.164319	-0.393337
chr17:44759897:44771584 ADAM11	0	0	0	-0.393324
chr9:4722625:4740937 AK3	0.181319	0	0.229966	0.392941
chr20:3167181:3173455 RP5-1187M17.10	-0.0664549	0	-0.0661307	-0.392709
chr3:15560897:15563358 HACL1,COLQ	0.287323	0	0	0.392522
chr16:2181929:2184777 CASKIN1	0	0	0	-0.391984
chr14:90923196:90943078 RPS6KA5	0.12995	0	0.16416	0.391914
chr11:34115884:34118396 NAT10	-0.0465844	0	0	-0.391614
chr2:29157347:29160333 CLIP4	0.0535404	0	0.100109	0.391243
chr2:29157402:29160333 CLIP4	-0.0535404	0	-0.100109	-0.391243
chr3:33573354:33576169 CLASP2	-0.120672	0	-0.154836	-0.390562
chr10:119781242:119781635 INPP5F	-0.101875	0	-0.11461	-0.389351
chr1:114397860:114399457 TRIM33	-0.208305	0	-0.197196	-0.388964
chr2:218650526:218656150 ZNF142	0	0	0	-0.388438
chr17:54962915:54963306 COX11	0.174945	0	0.21041	0.388283
chr1:110047869:110050343 STRIP1	-0.0326759	0	0	-0.387711
chr9:4722625:4726083 AK3	-0.189969	0	-0.225598	-0.387027
chr6:25610181:25619447 LRRC16A	0	0	-0.158101	-0.38675
chr18:47136449:47150378 HDHD2,RP11-49K24.6	0	0	0.175061	0.386642
chr8:22589741:22593733 PDLIM2,AC037459.4,C8orf58	0	0	0	-0.386438
chr10:49752248:49752638 OGDHL	0	0	0.108348	0.385562
chr10:49752372:49752638 OGDHL	0	0	-0.108348	-0.385562
chr18:2656261:2666870 SMCHD1	-0.137251	0	-0.107477	-0.38529
chr11:103236539:103243693 DYNC2H1	0	0	-0.173512	-0.385144
chr3:98573570:98585441 CPOX	0	0	-0.144745	-0.384642
chr3:98581511:98585441 CPOX	0	0	0.144745	0.384642
chr7:151240522:151241492 SMARCD3	0.0774272	0	0.086092	0.384105
chr1:245929937:246327201 SMYD3	0.0721974	0	0.0984712	0.383753
chr11:57791673:57795577 CTNND1,RP11-691N7.6	-0.22296	0	-0.108085	-0.383751
chr16:30852322:30888860 BCL7C	-0.0852295	0	-0.109599	-0.38361
chr2:253115:256207 SH3YL1	-0.175477	0	-0.123963	-0.383171
chr22:50286287:50287667 PLXNB2	-0.0456924	0	-0.0469506	-0.382926
chr3:195681666:195683752 LINC00969,SDHAP2	0	0	0	0.382365
chr3:195682217:195683752 LINC00969,SDHAP2	0	0	0	-0.382365
chr16:67169101:67169279 HSF4	0	0	0	0.381262
chr7:117745930:117756555 CTTNBP2	-0.094568	0	-0.1375	-0.380761
chr14:96291682:96294960 ATG2B	-0.0446952	0	-0.0678655	-0.379444
chr7:88171561:88181505 ADAM22	-0.160366	0	-0.161047	-0.379109
chr15:101430063:101431990 PCSK6	0	0	-0.0493566	-0.378639
chr5:87401772:87407976 CCNH	-0.108505	0	-0.136806	-0.377954
chr15:82859135:82864167 HOMER2	0.152182	0	0.128088	0.377074
chr15:82859168:82864167 HOMER2	-0.152182	0	-0.128088	-0.377074
chr1:144448916:144456537 NBPF15	-0.120371	0	-0.157349	-0.376846
chr3:197624197:197627572 AC024560.3	0	0	-0.0930276	-0.376104
chr15:55389433:55407847 CCPG1,DYX1C1-CCPG1	-0.0995082	0	-0.118371	-0.376065
chr15:55389433:55408221 CCPG1,DYX1C1-CCPG1	0.0995082	0	0.118371	0.376065
chr18:21741812:21765772 MIB1	0.0745156	0	0.105661	0.375699
chr2:230044:230547 SH3YL1	-0.131454	0	0	-0.374918
chr2:230044:231023 SH3YL1	0.131454	0	0	0.374918
chr6:57161152:57168423 ZNF451,BAG2	0.14141	0	0.15003	0.374645
chr11:34137026:34139385 NAT10	-0.0457704	0	-0.0441137	-0.37372
chr9:23762249:23825806 ELAVL2	-0.169397	0	-0.194519	-0.373462
chr14:90906299:90920206 RPS6KA5	0.182319	0	0.150397	0.372537
chr1:58685251:58690340 MYSM1	-0.124462	0	-0.12032	-0.372386
chr17:59930174:59931622 RPS6KB1	0.208033	0	0.182486	0.371432
chr6:111259727:111262257 MFSD4B	0	0	0	0.371044
chr3:136819628:136854443 SLC35G2	-0.17527	0	-0.209335	-0.370853
chrY:2975654:2976670 ZFY	0.20959	0	0.164978	0.370696
chr16:72044357:72088987 TXNL4B	-0.18587	0	0	-0.370572
chr16:72086802:72088987 TXNL4B	0.18587	0	0	0.370572
chr12:50401028:50427762 LARP4	0.203041	0	0.138387	0.370323
chr16:7676838:7709056 RBFOX1	-0.146381	0	-0.101893	-0.370288
chr12:39600716:39603792 ABCD2	-0.118096	0	-0.191727	-0.370016
chr12:39600716:39603912 ABCD2	0.118096	0	0.191727	0.370016
chr6:87473019:87501158 RP3-382I10.7,SLC35A1	0	0	-0.0364973	-0.37001
chr19:36937242:36949512 ZNF568	0.207357	0	0.16663	0.369371
chr2:74363427:74365075 DCTN1	0	0	-0.11389	-0.369345
chr4:83456958:83459740 MRPS18C	0	0	0	-0.369232
chr2:200981871:200988262 FAM126B	-0.148043	0	-0.148945	-0.368609
chr2:159764674:159767284 MARCH7	0.0319567	0	0.119793	0.368371
chr12:132822311:132828803 GOLGA3,CHFR	0.270954	0	0.253236	0.368309
chr1:166839604:166840955 POGK	0	0	0.158058	0.367932
chr12:108129926:108195282 WSCD2	-0.153853	0	-0.158236	-0.367815
chr16:15086258:15086365 RRN3	0.180705	0	0.209308	0.367467
chr1:6471100:6471488 PLEKHG5	0.0919973	0	0.140139	0.36645
chr1:6471240:6471488 PLEKHG5	-0.0919973	0	-0.140139	-0.36645
chr7:74711109:74716894 GTF2I	0	0	-0.131367	-0.3661
chr1:154268954:154270200 UBAP2L	0.133708	0	0.147557	0.364942
chr21:45850095:45896208 PCBP3	0.0662601	0	0.134333	0.364875
chr2:25379323:25388202 DTNB	-0.0737873	0	-0.0617957	-0.364769
chr6:24467274:24475121 GPLD1	-0.140433	0	-0.143069	-0.364595
chr8:100231288:100240403 SPAG1	-0.0500994	0	-0.0736157	-0.364256
chr10:91481139:91484507 HECTD2	-0.030688	0	-0.0706614	-0.364167
chr9:98745675:98751029 ANKS6	0	0	0	-0.364133
chr7:93976100:93996265 BET1	0	0	0	-0.364131
chr3:26712748:26715373 AC114877.3	0.243291	0	0.198063	0.363843
chr5:180324895:180330700 GFPT2	-0.0935916	0	-0.0864051	-0.363606
chr1:37878323:37880085 INPP5B	0.235964	0	0.231401	0.362554
chr1:37878492:37880085 INPP5B	-0.235964	0	-0.231401	-0.362554
chr12:8914827:8917630 PHC1	0	0	-0.13054	-0.362179
chr14:90923233:90943078 RPS6KA5	-0.0796075	0	-0.112414	-0.362095
chr3:191370036:191380159 CCDC50	0	0	0.0818187	0.361935
chrX:23833510:23840313 APOO	0.173698	0	0.139255	0.361848
chrX:23833612:23840313 APOO	-0.173698	0	-0.139255	-0.361848
chr15:43581388:43581853 PPIP5K1	0.208815	0	0	0.361425
chr15:43581429:43581853 PPIP5K1	-0.208815	0	0	-0.361425
chr13:72778380:72781605 DIS3	-0.074584	0	-0.0975936	-0.361135
chr2:222643005:222648740 FARSB	0	0	0.148597	0.360985
chr8:52230077:52254250 ST18	-0.168786	0	-0.0554142	-0.360568
chr7:108515574:108526029 PNPLA8	-0.203378	0	-0.141542	-0.36002
chr6:17787875:17794249 KIF13A	0	0	-0.13838	-0.359413
chr18:9136965:9182382 RP11-21J18.1,ANKRD12	0.104566	0	0.114597	0.359375
chr3:195960086:195965429 SDHAP1	-0.0539074	0	-0.0965494	-0.359088
chr6:80127624:80129161 BCKDHB	0	0	0	0.358932
chr2:73766903:73769265 DUSP11	-0.197823	0	0	-0.358737
chr15:58640960:58646055 ADAM10	-0.0699066	0	-0.0958594	-0.358544
chr12:88054413:88055576 CEP290	0.152583	0	0.153245	0.358041
chr5:39021136:39074329 RICTOR	-0.122219	0	-0.117731	-0.358018
chr19:10830378:10830978 DNM2	0	0	0	0.357789
chr17:81122823:81124727 AATK	-0.0639125	0	-0.0718233	-0.357106
chr5:178613639:178616882 CLK4	-0.0186875	0	-0.0646735	-0.356636
chr12:32737161:32740064 DNM1L	-0.0565814	0	-0.0701305	-0.356582
chr12:108240544:108247991 WSCD2	0.16684	0	0	0.356148
chr20:47210897:47221314 ZMYND8	-0.0695576	0	-0.106575	-0.355967
chr6:53065792:53071057 FBXO9	0	0	0	0.355343
chr6:53066150:53071057 FBXO9	0	0	0	-0.355343
chr1:206599092:206600263 EIF2D	-0.143701	0	0	-0.355307
chr1:27330804:27332070 TMEM222	0.108961	0	0.139006	0.354957
chr4:82425667:82426037 HNRNPDL	-0.166047	0	-0.147211	-0.354755
chr19:37156355:37169839 ZNF585A,CTC-454I21.3	-0.198446	0	-0.155798	-0.35456
chr3:20122804:20125905 KAT2B	0.0930326	0	0.114113	0.354232
chr3:20122973:20125905 KAT2B	-0.0930326	0	-0.114113	-0.354232
chr3:142376594:142380082 XRN1	0.175597	0	0.147002	0.354076
chr5:131464281:131472587 RAPGEF6,CTC-432M15.3	-0.197828	0	-0.188027	-0.353494
chr11:65539881:65540245 LTBP3	-0.0968463	0	0	-0.353423
chr17:27306882:27309100 WSB1	0	0	-0.0965745	-0.35319
chrX:48576083:48576314 RBM3	-0.136757	0	-0.183255	-0.353077
chr2:97142668:97144518 ANKRD36	-0.0937594	0	-0.107011	-0.352537
chr12:88053746:88054340 CEP290	0.118594	0	0.132417	0.352297
chr19:12074157:12075312 ZNF844	-0.104511	0	-0.156955	-0.352268
chr13:31946181:32078834 EEF1DP3,FRY	0.0240213	0	0.103041	0.351191
chr12:105107861:105114216 KIAA1033	-0.0269981	0	-0.0774196	-0.350313
chr11:85628688:85634086 TMEM126B	-0.0745225	0	-0.076569	-0.34977
chr11:43444209:43445931 TTC17	0	0	0.198859	0.349679
chr11:43444209:43448002 TTC17	0	0	-0.198859	-0.349679
chr5:179616218:179616869 HNRNPH1	0.110279	0	0.130845	0.34907
chr5:179616218:179617021 HNRNPH1	-0.110279	0	-0.130845	-0.34907
chr14:70329236:70359519 COX16,SYNJ2BP-COX16	0	0	-0.0942513	-0.348584
chr7:93994385:93996265 BET1	0	0	0	0.348384
chr8:94432656:94436495 RAD54B,FSBP	0.204987	0	0	0.348335
chr3:184290358:184290793 ECE2	0	0	0	-0.34817
chr7:128801509:128804650 CCDC136	-0.164077	0	-0.190834	-0.347765
chr15:50593280:50593617 TRPM7	0	0	-0.228625	-0.347602
chr11:64608082:64608564 NRXN2	-0.157584	0	-0.123472	-0.347573
chr8:15748465:15764203 TUSC3	-0.0842914	0	-0.112678	-0.347176
chr4:99892034:99894335 LAMTOR3	-0.0959685	0	0	-0.346719
chr6:57161152:57182032 ZNF451,BAG2	-0.105629	0	-0.0995054	-0.346661
chr13:19709599:19730239 PSPC1	0.13824	0	0	0.345509
chr16:16318079:16318923 AC138969.4,PKD1P1	0	0	0	-0.345291
chr14:39279537:39293271 RP11-407N17.3,CTAGE5	-0.110879	0	-0.1003	-0.344336
chr15:99566104:99632978 MEF2A	-0.0821002	0	-0.0991512	-0.344071
chr11:103156770:103158910 DYNC2H1	-0.0356459	0	-0.0806531	-0.343659
chr3:10329125:10338176 ATP2B2	-0.0848543	0	-0.133612	-0.342987
chr12:112163737:112167317 HECTD4	0	0	-0.0650246	-0.3419
chr2:69841039:69843088 GMCL1	-0.18659	0	0	-0.341726
chr2:69841039:69843149 GMCL1	0.18659	0	0	0.341726
chr13:36865758:36872658 SMAD9	-0.139568	0	-0.165549	-0.341717
chr14:77243056:77244349 TMEM63C	0	0	0.0911142	0.341681
chr3:154280669:154283188 DHX36	-0.0532694	0	-0.0956457	-0.341575
chr6:30571560:30577818 ABCF1	-0.0562528	0	-0.0755098	-0.341211
chr2:218476981:218482070 USP37	0	0	-0.102497	-0.340949
chr17:4940360:4940487 RNF167	-0.193512	0	-0.171073	-0.340672
chr12:6678460:6678663 ZNF384	0.10129	0	0.101871	0.340121
chr3:45826332:45827356 LZTFL1	0	0	0.092771	0.340048
chr9:2639981:2643160 VLDLR-AS1,VLDLR	-0.111437	0	0	-0.339386
chr8:68446460:68488023 C8orf34	0	0	-0.0860682	-0.339283
chrX:40071690:40072349 BCOR	0.219577	0	0.203254	0.338601
chr15:67202898:67204044 AAGAB	-0.0182187	0	-0.0264966	-0.338589
chr2:241723271:241723791 ING5	-0.100092	0	-0.1046	-0.338535
chr6:52994261:52995249 GSTA4	0.130613	0	0.124418	0.338534
chr6:52994401:52995249 GSTA4	-0.130613	0	-0.124418	-0.338534
chr13:28280541:28287984 PAN3	-0.0624072	0	-0.0762745	-0.338036
chr5:137945997:137948955 FAM13B	-0.11648	0	-0.120067	-0.337657
chr1:113701821:113704081 PHTF1	-0.158185	0	-0.104824	-0.337475
chr2:1791262:1792321 MYT1L	-0.0957344	0	-0.11912	-0.337091
chr2:1792007:1792321 MYT1L	0.0957344	0	0.11912	0.337091
chr8:58411469:58416850 UBXN2B	-0.207844	0	-0.224246	-0.337008
chr1:230675124:230678913 COG2	0.139408	0	0.0899602	0.33623
chr14:39399787:39431564 FBXO33	-0.0657627	0	-0.0572873	-0.336089
chr20:5943683:5943827 TRMT6	-0.115872	0	0	-0.335842
chr20:5943683:5943948 TRMT6	0.115872	0	0	0.335842
chrX:55727390:55729294 RRAGB	0.0842612	0	0.143247	0.335752
chr12:57093195:57094612 NAB2	0	0	-0.075042	-0.33557
chr22:48489704:48646597 FAM19A5	0.0903832	0	0.142117	0.335547
chr9:151427:152034 CBWD1	0	0	0	-0.335406
chr8:131904322:131940499 EFR3A	0.0550957	0	0.127469	0.335157
chr3:195683865:195685818 LINC00969,SDHAP2	0	0	0	0.335144
chr4:75648741:75655066 G3BP2	0	0	0	-0.335116
chr21:36057204:36058816 SETD4	0	0	0	-0.334784
chr17:20392584:20400521 CCDC144CP	-0.142744	0	-0.0970423	-0.334498
chr16:7709131:7710623 RBFOX1	0.084668	0	0.15365	0.334461
chr4:146175811:146182912 LSM6	0.14157	0	0	0.334411
chr4:146176437:146182912 LSM6	-0.14157	0	0	-0.334411
chr22:27853663:27858387 PITPNB	-0.0938478	0	-0.115563	-0.334243
chr19:36937242:36974420 ZNF568	-0.21302	0	-0.157783	-0.334125
chr2:151468146:151468641 RIF1	0	0	-0.0928284	-0.333949
chr2:253115:260085 SH3YL1	0.103403	0	0.118058	0.333548
chr3:58132931:58135979 FLNB	-0.0835809	0	-0.0789559	-0.333479
chrY:12914649:12915067 DDX3Y	-0.12251	0	0	-0.332756
chr4:8446590:8449669 TRMT44	0	0	0	-0.332406
chr4:8446590:8449698 TRMT44	0	0	0	0.332406
chr8:106713985:106739458 OXR1	0	0	0	-0.332147
chr15:74458896:74460668 UBL7	0	0	0	-0.332145
chr10:20868765:20880794 NEBL	-0.0965517	0	-0.0909268	-0.332103
chr5:180247510:180248973 MAPK9	-0.122266	0	-0.165813	-0.332047
chr6:152294127:152301869 SYNE1	0	0	-0.140742	-0.331004
chr7:74716950:74728786 GTF2I	-0.124313	0	-0.153997	-0.330834
chr5:73554986:73557575 ANKRA2	-0.0757582	0	-0.147143	-0.330785
chr7:100345968:100349799 STAG3L5P,STAG3L5P-PVRIG2P-PILRB	0.213555	0	0.211901	0.330339
chr20:62143889:62158672 SS18L1	0.0859529	0	0.15214	0.33021
chr8:38260147:38261538 DDHD2	-0.102926	0	-0.0981641	-0.330191
chr13:19670363:19670840 MPHOSPH8	-0.185186	0	-0.153108	-0.330103
chr14:64220637:64221534 SYNE2	-0.167173	0	-0.157538	-0.329914
chr14:64220637:64221576 SYNE2	0.167173	0	0.157538	0.329914
chr14:69770042:69770467 SRSF5	-0.148261	0	-0.0716254	-0.329517
chr1:207785682:207793519 CD46	-0.142778	0	-0.13209	-0.329298
chr2:98555691:98563465 INPP4A	0	0	0	-0.32925
chr9:113223325:113272427 CDC26	-0.0933229	0	-0.153781	-0.328318
chrX:23707944:23721881 ACOT9	0	0	0	-0.328
chr4:116928452:116949630 NA	0	0	0.119356	0.327797
chr19:54152999:54153715 CNOT3	0.171161	0	0	0.3277
chr19:54153082:54153715 CNOT3	-0.171161	0	0	-0.3277
chr1:17638003:17638496 ARHGEF10L	0	0	0	-0.327667
chr1:17638003:17638562 ARHGEF10L	0	0	0	0.327667
chr17:64822393:64824363 PLEKHM1P1	0	0	-0.100029	-0.327587
chrX:13735346:13736478 OFD1	0.175789	0	0.0854145	0.327579
chrX:134789266:134793815 FAM122B	-0.101183	0	-0.176884	-0.327288
chr21:33599248:33602234 CRYZL1	0	0	0	0.32657
chr21:33599285:33602234 CRYZL1	0	0	0	-0.32657
chr20:62316058:62316671 LAMA5	0	0	0	0.326123
chr20:62316204:62316671 LAMA5	0	0	0	-0.326123
chr10:15106698:15109702 NMT2	-0.0508395	0	0	-0.326025
chr11:86277991:86278399 EED	0	0	0	0.325728
chr11:86277991:86284020 EED	0	0	0	-0.325728
chr3:142185793:142185929 GK5	0.124683	0	0.164039	0.325646
chr3:15489637:15563358 HACL1,COLQ	-0.259145	0	0	-0.325564
chr13:39039711:39047040 NHLRC3	-0.0610033	0	-0.0564276	-0.325175
chr17:3716798:3723688 ITGAE	0	0	0	-0.325088
chr18:21705123:21765772 MIB1	-0.06717	0	-0.0959904	-0.325006
chr19:18427423:18427898 SSBP4	-0.0551143	0	-0.0772068	-0.324947
chr2:60794775:60794964 PAPOLG	0.13162	0	0.108156	0.324943
chr3:121790215:121807344 IQCB1	0	0	0	-0.32485
chr10:94562727:94571388 HELLS	0	0	-0.323987	0
chrX:140711656:140733878 LINC00632	0	0	-0.147953	-0.323688
chr11:95778957:95779607 FAM76B	0	0	0	-0.323293
chr7:78019976:78078947 MAGI2	0	0	0	-0.323286
chr11:14498985:14499603 COPB1,RP11-140L24.4	-0.102111	0	-0.110321	-0.322917
chr10:22318862:22318959 COMMD3,COMMD3-BMI1	0.0321135	0	0.0716635	0.322492
chr5:98868635:98869754 CHD1	0.178685	0	0.168262	0.322449
chr16:670557:670774 RHOT2	-0.163579	0	-0.144587	-0.321561
chr2:97558994:97560832 ANKRD36B	0	0	0	-0.321522
chr15:43135649:43148755 TMEM62	-0.140783	0	-0.107981	-0.321327
chr5:180242755:180247439 MAPK9	-0.124483	0	-0.153565	-0.321265
chr5:180242755:180247855 MAPK9	0.124483	0	0.153565	0.321265
chr1:26438284:26442708 DHDDS	0	0	0	-0.321038
chr11:63819002:63822631 C11orf84	-0.150106	0	-0.158193	-0.320978
chr10:73837511:73842169 CAMK2G	0	0	-0.120565	-0.320418
chr7:75879260:75881829 RHBDD2	0.146937	0	0.136064	0.319968
chr5:889647:891155 BRD9	0.155664	0	0	0.319924
chr5:889766:891155 BRD9	-0.155664	0	0	-0.319924
chr15:75362453:75364488 MAN2C1	0	0	0	-0.319736
chr8:94876489:94880118 INTS8	0.069288	0	0	0.319719
chr8:94876489:94894235 INTS8	-0.069288	0	0	-0.319719
chrX:101658142:101659758 ARMCX2	0	0	0	-0.319695
chr14:75661387:75663055 FLVCR2,TTLL5	0	0	0	0.319637
chr14:75661637:75663055 FLVCR2,TTLL5	0	0	0	-0.319637
chr3:161221409:161221994 NMD3	0	0	0.119994	0.319071
chr1:120473978:120489811 NA	0	0	0	-0.318867
chr6:28267213:28271854 ZSCAN26,RP5-874C20.8	0	0	0.110602	0.318685
chr6:28267453:28271854 ZSCAN26,RP5-874C20.8	0	0	-0.110602	-0.318685
chr16:57173869:57174169 FAM192A	-0.0770231	0	-0.0754312	-0.318604
chr3:35715476:35721605 ARPP21	-0.146761	0	0	-0.318087
chr8:38421941:38424509 FGFR1	0.11146	0	0.0982676	0.318005
chr8:38423175:38424509 FGFR1	-0.11146	0	-0.0982676	-0.318005
chr15:61867947:61868659 VPS13C	0.147741	0	0.189678	0.317974
chr6:83110314:83118888 DOPEY1	0	0	0	-0.317918
chr1:43650674:43653137 KDM4A	-0.118481	0	-0.121595	-0.317352
chr15:58916999:58933404 SLTM	-0.0512359	0	-0.0659998	-0.317118
chr15:48149371:48151473 MYEF2	-0.135372	0	-0.143151	-0.3165
chr4:112861135:112904455 ANK2	0	0	-0.14081	-0.316221
chr22:23311836:23312887 BCR	0.0969697	0	0.109563	0.316129
chr22:23311918:23312887 BCR	-0.0969697	0	-0.109563	-0.316129
chr6:42782101:42822018 GLTSCR1L	0	0	0	-0.316058
chr10:14878919:14896846 SUV39H2	0.193987	0	0.162766	0.315697
chr8:61643433:61644600 ASPH,AC090094.1	-0.0751044	0	-0.109479	-0.31532
chr12:88118570:88120114 CEP290	-0.119044	0	-0.118934	-0.31503
chr1:166839769:166840955 POGK	0	0	-0.137123	-0.314823
chr1:77641655:77682585 ZZZ3	0	0	0	0.314336
chr1:77641655:77683262 ZZZ3	0	0	0	-0.314336
chr6:143333445:143342575 AIG1	-0.08015	0	-0.0741244	-0.314241
chr3:184188407:184188761 ABCF3	0	0	0	0.314078
chr10:42782830:42784362 BMS1	0.174399	0	0.185663	0.313845
chr10:42782998:42784362 BMS1	-0.174399	0	-0.185663	-0.313845
chr2:87003157:87016302 PLGLB1	0	0	0.291486	0.313816
chr10:49736520:49737947 OGDHL	-0.0775037	0	0	-0.31381
chr8:12729332:12735286 LONRF1	-0.0625462	0	-0.049633	-0.313695
chr1:7785586:7786721 PER3	0.0652744	0	0.0627072	0.313638
chr14:95133503:95157230 DICER1	0	0	-0.121309	-0.313569
chr3:197533561:197546361 BDH1	-0.126652	0	-0.165093	-0.313544
chrX:136872345:136875086 RBMX	-0.0977398	0	-0.0681579	-0.313541
chr1:109659110:109665011 GSTM4	-0.144962	0	0	-0.313165
chr3:38129388:38131926 ACAA1	-0.149014	0	0	-0.312918
chr3:121807443:121808916 IQCB1	0.0556997	0	0.113278	0.312671
chr5:34911812:34914695 RAD1	0	0	0	-0.312454
chr17:67737145:67737508 NOL11	0.075776	0	0.100845	0.312451
chr6:159790639:159790940 MRPL18	0.146838	0	0.171713	0.31241
chr12:63600386:63617304 DPY19L2	-0.120454	0	-0.150782	-0.312354
chr11:65713058:65713593 KAT5	-0.131249	0	0	-0.312223
chr22:31450360:31454144 EIF4ENIF1	0.112135	0	0.0834531	0.312154
chr1:74723270:74732956 CRYZ	0	0	-0.0700025	-0.312118
chr16:24794719:24797490 TNRC6A	-0.10135	0	0	-0.311644
chr16:11003257:11020193 CLEC16A	0	0	0	0.311244
chr16:11003305:11020193 CLEC16A	0	0	0	-0.311244
chr12:50134702:50135732 CERS5	0	0	0	-0.310944
chr22:37623633:37629462 GGA1	0	0	0	-0.310911
chr16:69566374:69626403 NFAT5	-0.132917	0	-0.142475	-0.310439
chr2:206279592:206281801 ZDBF2	-0.191517	0	-0.101417	-0.310082
chr1:185305643:185307014 IVNS1ABP	0	0	0	0.310044
chr2:209982317:209992166 UNC80	0	0	0	-0.309927
chr1:110668344:110671476 NA	0	0	0	0.309708
chr10:103100019:103101045 NT5C2	0	0	-0.120274	-0.309582
chr11:11842224:11884467 USP47	-0.0871535	0	-0.120954	-0.309449
chr10:31831800:31843461 ARHGAP12	-0.282908	0	-0.178456	-0.309425
chr9:113267439:113272427 CDC26	0.184615	0	0.159221	0.309028
chr11:17431032:17432204 ABCC8	-0.126335	0	-0.108919	-0.308902
chr1:33024567:33036736 AK2	0	0	-0.139002	-0.308857
chr6:30296237:30326354 HCG18,HCG17	0	0	0	0.308559
chr2:97164311:97164397 ANKRD36	0.110418	0	0.17652	0.308466
chr3:56623843:56624479 FAM208A	0	0	0	0.308313
chr10:100260319:100261979 CWF19L1	-0.0671383	0	-0.103192	-0.307864
chr6:30651082:30651266 C6orf136	0	0	0	0.307852
chr6:30651100:30651266 C6orf136	0	0	0	-0.307852
chr15:90902975:90904190 MAN2A2	0	0	0	-0.307481
chr17:37520214:37520538 SYNRG	0.0748833	0	0.149577	0.307453
chr3:129434136:129436461 MBD4	0	0	0.0947162	0.307208
chr3:15713641:15720915 ANKRD28	-0.0903243	0	0	-0.307192
chr1:64803061:64804734 RAVER2	-0.132727	0	-0.146277	-0.307026
chr1:64803061:64804773 RAVER2	0.132727	0	0.146277	0.307026
chr16:560661:563256 PRR35	0	0	-0.180107	-0.306943
chr21:39345274:39348292 HMGN1	0	0	0	-0.306943
chr2:61145196:61163052 C2orf74,RP11-493E12.3	-0.0881375	0	-0.0973336	-0.306927
chr6:46662498:46668709 SLC25A27	-0.0533353	0	-0.0879886	-0.306673
chr15:25076990:25078862 SNHG14	0	0	0.0649123	0.306593
chr10:124706887:124744013 FAM53B,METTL10,RP11-12J10.3	0.104286	0	0	0.306519
chr10:122228008:122229346 TACC2	0	0	0.0822739	0.306404
chr19:10177367:10180350 DNMT1	0	0	0	0.306374
chr5:180247926:180248973 MAPK9	0.109221	0	0.141351	0.306046
chr16:76448951:76452508 CNTNAP4	-0.0681236	0	-0.0792239	-0.305933
chr1:205504796:205523147 CDK18	0	0	0.305701	0
chr1:205504878:205523147 CDK18	0	0	-0.305701	0
chr12:6673440:6678127 ZNF384	0	0	0	-0.30539
chr1:51714079:51745536 OSBPL9	-0.101297	0	0	-0.305373
chr8:13012857:13021008 KIAA1456	-0.159662	0	-0.165687	-0.305291
chr8:139612674:139618258 KCNK9	-0.133322	0	-0.159937	-0.305045
chr16:30887990:30888860 BCL7C	0.154478	0	0.117014	0.304953
chr6:83120791:83121930 DOPEY1	0.0506434	0	0.0720298	0.304701
chr22:40280143:40285645 TNRC6B	-0.171667	0	-0.160204	-0.304498
chr3:146196793:146206526 PLSCR4	-0.0680986	0	-0.103592	-0.304439
chr17:20009424:20096631 SPECC1	0.168249	0	0.161263	0.304426
chr1:243140107:243142316 CEP170	-0.148089	0	0	-0.304364
chr16:22258695:22260462 EEF2K	0.0671534	0	0.0589096	0.304013
chr2:187385631:187387666 CALCRL	0	0	-0.0656515	-0.303811
chr12:112254162:112256320 HECTD4	0.102104	0	0.108736	0.303782
chr12:112254189:112256320 HECTD4	-0.102104	0	-0.108736	-0.303782
chr9:128224389:128234021 DNM1	0.085493	0	0.0962102	0.303643
chr9:128226173:128234021 DNM1	-0.085493	0	-0.0962102	-0.303643
chr4:139072003:139073454 ELF2	0.172204	0	0.166013	0.303591
chr4:139072039:139073454 ELF2	-0.172204	0	-0.166013	-0.303591
chr1:151138406:151139425 SEMA6C	0	0	0	-0.303379
chr4:109717713:109718683 PLA2G12A	0.121481	0	0.084444	0.303218
chr3:38236961:38242547 OXSR1	0	0	-0.142483	-0.303118
chr1:100911150:100913663 SLC30A7	-0.0633366	0	-0.0666313	-0.303052
chr3:98521442:98522849 CLDND1,CPOX	-0.110177	0	0	-0.302958
chr9:128222860:128224251 DNM1	0	0	0.097764	0.302895
chr9:128222860:128226035 DNM1	0	0	-0.097764	-0.302895
chr9:128755659:128771815 ZER1	0.154014	0	0.128219	0.302373
chr3:26712748:26713225 AC114877.3	-0.180858	0	-0.152068	-0.302346
chr15:43169677:43181181 TMEM62	0	0	0	-0.302342
chr19:57922629:57925623 ZNF418	0	0	0	-0.302166
chr19:1358464:1360136 MUM1	0.111831	0	0	0.302135
chr19:36548322:36554670 ZNF529	-0.149971	0	-0.182945	-0.301874
chr16:18896956:18925950 SMG1	-0.186471	0	-0.122698	-0.301714
chr1:149188789:149197996 NA	0	0	0	-0.30169
chr16:28715434:28723164 EIF3C	0.18059	0	0.252976	0.301443
chr8:100533311:100559711 ANKRD46	0	0	0.101743	0.301129
chr6:143468165:143470961 PEX3	0.0701234	0	0.0875552	0.300683
chr3:9934917:9940850 CRELD1	0	0	0	-0.30042
chr7:151134568:151141898 AGAP3	0	0	0	-0.300299
chr15:61863528:61864641 VPS13C	-0.151762	0	-0.163189	-0.300239
chr2:241724174:241724989 ING5	-0.0905566	0	-0.113464	-0.299998
chr16:31700738:31703156 CLUHP3	0	0	0	-0.299472
chr20:35739017:35740824 RBM39	-0.162494	0	-0.14101	-0.299426
chrX:102599847:102605482 ARMCX5,ARMCX5-GPRASP2	-0.0951152	0	-0.145702	-0.299223
chr9:4625566:4629091 SPATA6L	0.144047	0	0.172752	0.299106
chr14:55027471:55042952 SOCS4	0.153962	0	0	0.298656
chr5:94053227:94111511 FAM172A	-0.0876255	0	-0.0934261	-0.298513
chr8:13012793:13021008 KIAA1456	0.166886	0	0.165793	0.298463
chr2:189667945:189689527 ASNSD1,ANKAR	-0.106092	0	-0.118416	-0.298405
chr8:38260147:38260600 DDHD2	0.0998766	0	0.0918125	0.298254
chr19:14480778:14482689 GIPC1	0.0798663	0	0	0.298054
chr16:4800578:4801503 ROGDI	0	0	0	-0.297751
chr4:113548729:113552031 CAMK2D	0.112158	0	0.128087	0.297409
chr6:30640422:30642176 ATAT1	0	0	0	-0.297173
chr13:25307948:25312883 NUP58	-0.0773865	0	-0.114798	-0.297155
chr16:75447688:75451669 TMEM170A,RP11-77K12.1	0	0	0	-0.297128
chr16:75447688:75451738 TMEM170A,RP11-77K12.1	0	0	0	0.297128
chr3:57630978:57641653 DENND6A	-0.0180363	0	-0.0445727	-0.297062
chr15:63654324:63655742 HERC1	0	0	0	0.297055
chr15:63654375:63655742 HERC1	0	0	0	-0.297055
chr15:22564532:22569149 HERC2P2	0	0	-0.167389	-0.296953
chr19:9533966:9536208 ZNF426	0	0	0	-0.296845
chr3:121781874:121790073 IQCB1	0	0	0	-0.296775
chr4:20704814:20713432 PACRGL	-0.113441	0	-0.149201	-0.296759
chr13:37009809:37012192 SUPT20H	-0.0570909	0	-0.122228	-0.296646
chr15:52269860:52272580 MYO5C	0	0	0	-0.296442
chr3:154283271:154284814 DHX36	-0.0430052	0	-0.0544488	-0.296423
chr11:125903430:125905553 DDX25	-0.0550781	0	-0.0999407	-0.296261
chr2:95851787:95853709 ANKRD36C	-0.166201	0	-0.211033	-0.296091
chr9:6486925:6493826 UHRF2	-0.169835	0	-0.170499	-0.295806
chr3:49116943:49117437 USP19	-0.0659125	0	0	-0.29552
chr6:47599443:47606165 CD2AP	0	0	0	-0.295484
chr4:81456788:81459332 RASGEF1B	0	0	-0.0966749	-0.295164
chr22:49783979:49787390 BRD1	-0.046477	0	-0.101176	-0.294784
chr3:101493968:101513091 SENP7	-0.071495	0	0	-0.294382
chr3:49278451:49280744 USP4	-0.0703747	0	-0.0858105	-0.294166
chr17:42118403:42119054 KAT2A	0	0	0	0.294064
chr17:42118403:42119245 KAT2A	0	0	0	-0.294064
chr20:46504740:46506307 ZNF334	-0.161257	0	-0.151876	-0.294052
chr4:112620190:112631930 ZGRF1	0	0	0	-0.293829
chr14:24440926:24442346 SDR39U1	0	0	-0.024629	-0.293586
chr22:41141222:41147837 EP300	-0.0548903	0	-0.0543775	-0.293567
chr20:6015490:6032012 CRLS1	-0.0660499	0	0	-0.292961
chr7:96656585:96694798 SHFM1	-0.0937394	0	-0.10596	-0.292893
chr7:103304490:103308952 PMPCB	-0.106241	0	-0.112404	-0.292687
chr10:15135418:15141422 NMT2	0	0	0.121333	0.292631
chr16:70299354:70315969 DDX19B,RP11-529K1.3	-0.132057	0	-0.177823	-0.292586
chr17:31880754:31885980 UTP6	-0.0929403	0	-0.0662092	-0.292544
chr1:172579267:172588760 SUCO	-0.141309	0	-0.131078	-0.292428
chr5:74718363:74718760 HEXB	-0.0260997	0	-0.0708364	-0.292364
chr5:74718363:74718797 HEXB	0.0260997	0	0.0708364	0.292364
chr3:193644105:193645728 OPA1	-0.0398771	0	-0.0477888	-0.292298
chr1:2497010:2498523 PLCH2	0	0	-0.10857	-0.2922
chr5:94520917:94536996 KIAA0825	0	0	-0.0975049	-0.292064
chr10:45663842:45672272 ZFAND4	0	0	0	0.291994
chr12:53467293:53468777 PCBP2	-0.0886988	0	-0.065746	-0.291917
chr3:57630978:57633265 DENND6A	0.00484016	0	0.0390351	0.291821
chr1:243128300:243136143 CEP170	-0.0557721	0	-0.0524852	-0.291561
chr3:173585034:173604279 NLGN1	0	0	0	-0.291478
chr4:500601:505718 PIGG	0.110969	0	0.12673	0.291457
chr14:21075499:21075766 ARHGEF40	0	0	0	-0.291429
chr3:129434136:129436443 MBD4	0	0	-0.0774557	-0.291306
chr16:70146228:70147541 PDPR	0	0	-0.0737356	-0.291245
chr16:70146228:70148464 PDPR	0	0	0.0737356	0.291245
chr22:24369320:24412648 SPECC1L,SPECC1L-ADORA2A	-0.0822636	0	0	-0.291135
chr6:159790060:159790940 MRPL18	-0.122654	0	-0.169735	-0.291109
chr1:146643674:146644031 HYDIN2	0	0	0.29079	0
chr1:146643674:146646125 HYDIN2	0	0	-0.29079	0
chr10:42594699:42631929 ZNF33B	0	0	0	-0.290629
chr3:197297235:197297544 DLG1	-0.124595	0	-0.125272	-0.290453
chr17:58972275:58979974 PPM1E	-0.088745	0	-0.0863204	-0.289969
chr9:77382087:77403236 VPS13A	-0.108783	0	-0.113861	-0.289588
chr12:69362907:69370706 YEATS4	-0.0684333	0	0	-0.289222
chrX:119838527:119841076 UPF3B	0	0	-0.0940173	-0.289185
chr6:33442494:33442889 SYNGAP1	0.0784771	0	0.0705923	0.289147
chr2:61186497:61187909 AHSA2	-0.163325	0	-0.186264	-0.288928
chr9:68705762:68818461 PIP5K1B	0	0	0	-0.288875
chr2:127470385:127486553 IWS1	-0.0904884	0	0	-0.288829
chr2:127481175:127486553 IWS1	0.0904884	0	0	0.288829
chr4:25407253:25409660 ANAPC4	-0.0271142	0	-0.11333	-0.288826
chr4:25407253:25409698 ANAPC4	0.0271142	0	0.11333	0.288826
chr15:59081284:59084102 RNF111	0	0	-0.10959	-0.288739
chr15:59081284:59084129 RNF111	0	0	0.10959	0.288739
chr15:65155856:65157746 CLPX	-0.0402562	0	-0.0909021	-0.288647
chrX:15804197:15809200 ZRSR2	-0.0315998	0	-0.0476929	-0.288626
chr17:76735158:76736154 SRSF2	0	0	-0.117418	-0.287896
chr2:74528006:74528417 AUP1	-0.0726515	0	-0.0412785	-0.287728
chr9:97326669:97328020 RP11-23J9.4,CCDC180	0.14987	0	0.10757	0.287564
chr3:65357132:65359064 MAGI1	0	0	0	0.287354
chr2:39755960:39761331 THUMPD2	0	0	0	-0.28728
chr16:89873859:89883351 TCF25	0.110642	0	0.1342	0.287184
chr10:14881645:14896846 SUV39H2	-0.162731	0	-0.138604	-0.287033
chr2:97154741:97158107 ANKRD36	0.0538877	0	0.0928479	0.286853
chr6:30917806:30919758 VARS2	-0.0361846	0	-0.0462672	-0.286849
chr15:50300902:50301221 GABPB1	-0.14436	0	0	-0.286663
chr15:50300902:50301257 GABPB1	0.14436	0	0	0.286663
chr22:46045007:46097926 MIRLET7BHG,PRR34-AS1	0	0	0	0.286502
chr3:169782643:169784622 MYNN	-0.0726427	0	-0.099187	-0.286423
chr3:195683865:195688533 LINC00969,SDHAP2	0	0	0	-0.28621
chr8:139612674:139616386 KCNK9	0.111648	0	0.14543	0.285533
chr4:113903675:113978437 ARSJ	0	0	0	-0.2853
chr16:560235:563256 PRR35	0	0	0.160621	0.285249
chr5:95516586:95516916 TTC37	-0.117523	0	0	-0.285058
chr3:56623566:56624479 FAM208A	0	0	0	-0.284995
chr4:15686462:15686932 FAM200B	-0.0561782	0	0	-0.284936
chr8:144241517:144242211 MROH1	-0.106688	0	-0.108348	-0.284739
chr8:144241517:144242369 MROH1	0.106688	0	0.108348	0.284739
chr8:100239404:100240403 SPAG1	0.0642955	0	0.0856133	0.284725
chr6:110985138:110991747 RPF2	-0.0344437	0	-0.0450977	-0.284663
chr17:73193384:73196487 COG1,RP11-143K11.5	0	0	-0.129582	-0.284603
chr17:73193384:73196507 COG1,RP11-143K11.5	0	0	0.129582	0.284603
chr6:42688386:42689569 UBR2	0	0	0.0823813	0.284377
chr2:219299384:219299985 PTPRN	0	0	0	-0.284299
chr18:9137096:9182382 RP11-21J18.1,ANKRD12	-0.0774217	0	-0.0875949	-0.284124
chr5:141625365:141626194 HDAC3	-0.0517116	0	-0.0610586	-0.283909
chr2:97532384:97536300 ANKRD36B	0.2085	0	0.206867	0.283791
chr2:39290334:39292773 MAP4K3	0.035844	0	0.120159	0.283701
chr6:31540534:31541950 DDX39B,ATP6V1G2-DDX39B	0.151072	0	0.14319	0.283446
chr5:112862583:112891603 CTC-554D6.1,CTC-487M23.8,SRP19	-0.0523851	0	-0.0442019	-0.283273
chr1:26438284:26442731 DHDDS	0	0	0	0.283246
chr17:56949434:56949889 COIL	-0.0461075	0	0	-0.283052
chr3:113010704:113011045 NEPRO	0.106062	0	0.0856837	0.283013
chr3:182898772:182913861 ATP11B	0	0	-0.0810119	-0.282728
chr2:53910130:53919151 PSME4	0	0	0.132831	0.282577
chr7:128641379:128642217 NA	0	0	0	0.282457
chr21:37232451:37238460 DSCR3	0	0	0	-0.282399
chr20:18494063:18497069 RBBP9	0	0	-0.282386	0
chr16:28152785:28155946 XPO6	0	0	-0.0563664	-0.282267
chr19:34677856:34678737 ZNF302	0.182002	0	0.179555	0.282193
chr19:40786978:40796570 RAB4B,RAB4B-EGLN2,EGLN2	0	0	0	0.28211
chr1:43650252:43653137 KDM4A	0.118292	0	0.120012	0.282098
chr17:37519071:37520179 SYNRG	0.115749	0	0.123445	0.282047
chr13:26353880:26385211 CDK8	-0.125901	0	-0.0916761	-0.281947
chr9:37857351:37860048 DCAF10	0	0	0	0.281939
chr11:1445907:1449776 BRSK2	0	0	0	-0.281745
chr3:48693179:48695090 IP6K2	-0.0915276	0	-0.0927913	-0.281726
chr5:119164676:119166616 DMXL1	-0.0649287	0	-0.0504396	-0.280651
chr6:39105776:39114883 SAYSD1	-0.153066	0	-0.280571	0
chr1:203048714:203049676 PPFIA4	0	0	-0.0715517	-0.280566
chr16:69996468:70021824 PDXDC2P	0	0	0	-0.280345
chr7:23521840:23531789 TRA2A	-0.130298	0	-0.15843	-0.280285
chr2:165377650:165380592 SCN2A	0.0314127	0	0.074842	0.280241
chr5:149513209:149520290 CSNK1A1	-0.120684	0	-0.106719	-0.280178
chr1:174252590:174275833 RABGAP1L	-0.0990572	0	-0.103313	-0.279985
chr16:1786655:1787677 NUBP2	0.169592	0	0.188256	0.27984
chr2:69396290:69400364 GFPT1,NFU1	0.129041	0	0.144744	0.279815
chr4:894009:898033 GAK	-0.0832214	0	0	-0.27969
chr1:185306625:185307014 IVNS1ABP	0	0	0	-0.279683
chrX:153559522:153559729 ATP2B3	-0.117231	0	-0.111377	-0.279677
chr6:149021481:149073833 UST	0	0	0.173735	0.279486
chr6:149066254:149073833 UST	0	0	-0.173735	-0.279486
chr22:49787887:49794034 BRD1	0	0	0	-0.279003
chr1:32830067:32853079 S100PBP	0	0	0	-0.27865
chr4:27007700:27008428 STIM2	-0.171747	0	-0.152149	-0.278579
chr9:77382087:77384585 VPS13A	0.17028	0	0.126208	0.278557
chr4:113537443:113547644 CAMK2D	-0.0902086	0	-0.106258	-0.278487
chr8:123267386:123274122 ZHX1,ZHX1-C8orf76	-0.143331	0	-0.123627	-0.278461
chr8:93917079:93922016 PDP1	0.131526	0	0.162412	0.278455
chr3:121826180:121828861 IQCB1	-0.0631925	0	-0.0714677	-0.278315
chr4:145110444:145110968 ABCE1	0.0520441	0	0.0585125	0.278291
chr15:43345980:43348907 ADAL	0	0	0	-0.278166
chr4:47910994:47913797 NFXL1	0	0	-0.0900998	-0.278124
chr4:47910994:47913969 NFXL1	0	0	0.0900998	0.278124
chr16:57213946:57216107 RSPRY1	0.0275937	0	0	0.278056
chr17:5422829:5432542 RPAIN	-0.0847111	0	0	-0.278027
chr15:73563257:73570150 NPTN	-0.0905209	0	-0.118742	-0.277921
chr11:85662457:85663524 CREBZF	-0.190163	0	-0.197304	-0.277902
chr2:24275849:24284763 ITSN2	0.0881166	0	0.125741	0.277649
chr8:124516030:124518742 TATDN1	-0.114346	0	-0.171406	-0.277226
chr8:124516030:124518818 TATDN1	0.114346	0	0.171406	0.277226
chr1:248850516:248853937 ZNF692	0	0	0	-0.277084
chr12:69370975:69390147 YEATS4	0.112378	0	0	0.277054
chr12:69370975:69407160 YEATS4	-0.112378	0	0	-0.277054
chr15:69160757:69210316 GLCE	0	0	-0.159827	-0.277053
chr1:42199230:42227883 FOXJ3	0	0	0	-0.276948
chr1:42457350:42459603 PPCS,CCDC30	0.123463	0	0	0.276792
chr19:14163406:14164621 ADGRL1	0	0	0	-0.276726
chr12:6670838:6673216 ZNF384	0	0	-0.0823234	-0.276691
chr3:53666535:53673023 CACNA1D	0	0	0	0.276634
chr3:53666535:53673713 CACNA1D	0	0	0	-0.276634
chrX:16832742:16834283 TXLNG	0.0578365	0	0.0689639	0.276423
chr19:9660874:9674632 ZNF562	-0.276246	0	0	0
chr19:9660874:9675015 ZNF562	0.276246	0	0	0
chr16:1666600:1667335 CRAMP1,LA16c-431H6.6	0	0	0.123149	0.276181
chr5:81467041:81473700 SSBP2	0	0	0	0.275952
chr5:81467065:81473700 SSBP2	0	0	0	-0.275952
chr9:13136182:13137957 MPDZ	-0.0581289	0	-0.0776595	-0.275816
chr6:31540664:31541950 DDX39B,ATP6V1G2-DDX39B	-0.133243	0	-0.116667	-0.275798
chr21:46635763:46636896 PRMT2	-0.136941	0	0	-0.275684
chr17:43801877:43820862 MPP3	0	0	0	-0.275668
chr4:1871542:1900626 WHSC1	0	0	0	0.275642
chr18:35972840:35974896 C18orf21	0	0	-0.124626	-0.275631
chr18:35972907:35974896 C18orf21	0	0	0.124626	0.275631
chr3:5208263:5210175 EDEM1	0.126675	0	0.16497	0.275556
chr12:111457359:111464662 ATXN2	0.104117	0	0.104779	0.275521
chr1:15426018:15428593 EFHD2	-0.054132	0	-0.0688624	-0.275503
chr12:22472347:22474751 C2CD5	-0.0476952	0	-0.0711657	-0.275236
chr13:102766580:102767273 TEX30	0	0	0.0904369	0.275166
chr20:43458509:43459771 SRSF6	0.17055	0	0	0.275081
chr16:87755292:87761949 KLHDC4	0	0	0	-0.275013
chr12:29350068:29357623 ERGIC2	-0.0567345	0	-0.0834665	-0.27495
chr3:173396695:173604279 NLGN1	0	0	0	0.274925
chr22:24270983:24302195 SPECC1L,SPECC1L-ADORA2A	-0.134002	0	0	-0.274809
chr10:34269899:34317107 PARD3	0	0	0	-0.27467
chr3:63996483:63999450 ATXN7	0	0	-0.120092	-0.274622
chr6:138287184:138289818 ARFGEF3	0.0880276	0	0.124283	0.274508
chr6:138287296:138289818 ARFGEF3	-0.0880276	0	-0.124283	-0.274508
chr12:95296258:95300165 VEZT	-0.0984211	0	-0.138343	-0.274059
chr4:70902550:70958874 MOB1B	0.0874304	0	0.127976	0.274056
chr11:63905043:63908260 MARK2	0.114298	0	0.0982756	0.273913
chr12:47964423:47968133 TMEM106C	0	0	0	-0.273806
chr3:142101841:142149183 TFDP2	0	0	0	0.273718
chr7:120955624:120966626 ING3	0	0	0	-0.27362
chr1:77968203:77969925 FUBP1	-0.182933	0	-0.178807	-0.273438
chr3:186280744:186288710 DGKG	-0.0736463	0	0	-0.273381
chr15:49017628:49027365 SECISBP2L	-0.103971	0	0	-0.273363
chr1:62084648:62114053 PATJ	-0.0724831	0	-0.0825243	-0.273354
chr1:59821943:59828780 HOOK1	0	0	0	0.273228
chr1:59822090:59828780 HOOK1	0	0	0	-0.273228
chr5:94912976:94940084 MCTP1	-0.167956	0	-0.154745	-0.27311
chrX:118978463:118989408 LONRF3	0	0	0	-0.273001
chr12:122930171:122932192 ABCB9	0.272999	0	0.192943	0
chr5:6622100:6623214 NSUN2	0.108929	0	0.107795	0.272842
chr6:152990095:152992857 MTRF1L	-0.112479	0	-0.0982621	-0.272755
chr15:74905231:74906587 FAM219B	0	0	0	-0.272694
chr5:95517322:95522054 TTC37	-0.060444	0	-0.0878101	-0.272642
chr12:6551001:6555257 IFFO1	0.146241	0	0.154019	0.27253
chr3:184386755:184386845 CHRD	0.0753184	0	0.0832067	0.272198
chr22:22307021:22307106 LL22NC03-80A10.6,BMS1P20	0	0	0.125585	0.272133
chr5:127291056:127331291 MEGF10	-0.1751	0	-0.157508	-0.271963
chr18:79916479:79919184 PQLC1	-0.133003	0	-0.116575	-0.271938
chr15:72320702:72345446 RP11-106M3.2,HEXA	-0.271699	0	0	0
chr15:72344140:72345446 RP11-106M3.2,HEXA	0.271699	0	0	0
chr8:42535335:42540915 SLC20A2	-0.113528	0	-0.0812668	-0.271675
chr17:63798099:63800468 DDX42	-0.0748978	0	0	-0.271327
chr8:27659539:27670900 SCARA3	0.186348	0	0.167094	0.271296
chr15:41475819:41476181 RTF1	-0.0808888	0	-0.109803	-0.271283
chr15:41475819:41476446 RTF1	0.0808888	0	0.109803	0.271283
chr17:37207800:37221724 ACACA	-0.0848911	0	-0.118956	-0.271256
chr2:201626147:201628076 TMEM237	-0.0171123	0	-0.0347646	-0.271108
chr17:20392584:20394021 CCDC144CP	0.203458	0	0.270846	0.225187
chr14:58444175:58450579 KIAA0586	-0.0856913	0	-0.0959479	-0.270727
chr4:62044549:62070109 ADGRL3	0	0	-0.104337	-0.270709
chr16:28721032:28723164 EIF3C	-0.178437	0	-0.205589	-0.270611
chr3:136819214:136854443 SLC35G2	0.114609	0	0.15822	0.270519
chr11:96353714:96358993 CCDC82	0.187907	0	0.116888	0.270366
chr19:18433817:18434217 SSBP4	0.193648	0	0.270361	0
chr19:18433932:18434217 SSBP4	-0.193648	0	-0.270361	0
chrX:53083305:53084532 TSPYL2	-0.124703	0	-0.116854	-0.270336
chrX:53083305:53084545 TSPYL2	0.124703	0	0.116854	0.270336
chr21:39345274:39345830 HMGN1	0	0	0	0.270099
chr17:67736754:67737071 NOL11	0.094599	0	0.0610474	0.269961
chr17:69222697:69225325 ABCA10	0	0	-0.233998	-0.269935
chr7:35179155:35185720 DPY19L2P1	0	0	0	-0.269797
chr17:74953086:74954138 HID1	-0.0441594	0	-0.0435595	-0.269707
chr2:165377650:165381100 SCN2A	-0.0209695	0	-0.0490105	-0.269704
chr19:1269410:1270928 CIRBP	0.076261	0	0.0604712	0.269614
chr3:105678571:105681724 CBLB	-0.131496	0	-0.127323	-0.269524
chr16:1666600:1667962 CRAMP1,LA16c-431H6.6	0	0	-0.0309332	-0.269438
chr6:33441759:33442453 SYNGAP1	0.0398355	0	0.0951566	0.269286
chr3:25645455:25664229 TOP2B	0.0574292	0	0	0.269206
chr3:25645470:25664229 TOP2B	-0.0574292	0	0	-0.269206
chr4:101029195:101032267 PPP3CA	0.107538	0	0.114418	0.268851
chrX:65525050:65529212 LAS1L	-0.121384	0	0	-0.268841
chr6:42879951:42883451 RPL7L1	-0.0978048	0	0	-0.268789
chr2:208342649:208346050 PIKFYVE	-0.030909	0	-0.0611293	-0.268486
chr1:151442205:151442305 POGZ	0	0	0	0.268179
chr6:28904665:28908808 TRIM27	-0.0280123	0	-0.0425036	-0.267981
chr13:38354296:38359301 UFM1	-0.0463758	0	-0.0507276	-0.267841
chr17:8228629:8228727 CTC1	0.0903749	0	0.0940521	0.267813
chr2:232567214:232580904 EIF4E2	0	0	0	-0.26775
chr1:149001696:149002850 PDE4DIP	0.126523	0	0	0.267701
chr3:17214370:17238163 TBC1D5	0	0	-0.123075	-0.267638
chr2:209772164:209775889 UNC80	-0.117598	0	-0.0922828	-0.267631
chr11:106059109:106077312 KBTBD3	-0.0487931	0	-0.0713562	-0.267583
chr1:99896388:99900636 AGL,AC096949.1	0.111968	0	0.117413	0.267489
chr9:138013235:138023011 CACNA1B	-0.112012	0	-0.0843338	-0.267403
chr2:44218537:44230413 PPM1B	0.0968716	0	0.113803	0.267384
chr17:51225209:51260120 MBTD1	0	0	0	-0.267351
chr9:136477684:136482938 SEC16A	0	0	0.115433	0.267311
chr9:136477684:136483510 SEC16A	0	0	-0.115433	-0.267311
chr6:3283975:3285079 SLC22A23	0.157823	0	0	0.267275
chr9:137163904:137167774 GRIN1	0.0852176	0	0.0857322	0.267122
chr22:22304114:22306790 BMS1P20,LL22NC03-80A10.6	0	0	0	-0.267117
chr13:97357635:97391322 MBNL2	0	0	-0.104022	-0.267023
chr17:75702571:75704756 SAP30BP	-0.0283823	0	0	-0.267016
chr1:16449201:16451838 NECAP2	0	0	0	0.266919
chrX:107917649:107924343 MID2	0	0	0	0.266892
chrX:107917739:107924343 MID2	0	0	0	-0.266892
chr14:74889349:74891056 DLST	-0.0500319	0	-0.0678387	-0.266711
chr9:34614768:34616030 DCTN3	0	0	0	0.266601
chr1:110342268:110346308 RBM15	0.120756	0	0.157017	0.266551
chr12:122054926:122059092 BCL7A	0	0	0	0.266523
chr12:122054989:122059092 BCL7A	0	0	0	-0.266523
chr2:85362260:85368686 ELMOD3	0	0	0	-0.266489
chr6:31620858:31622690 PRRC2A	-0.0800311	0	-0.112812	-0.266307
chr6:31620858:31622727 PRRC2A	0.0800311	0	0.112812	0.266307
chr10:125833946:125836104 BCCIP	0.110112	0	0.122294	0.266252
chr10:125833946:125841255 BCCIP	-0.110112	0	-0.122294	-0.266252
chr4:122274436:122275972 KIAA1109	0.105312	0	0.0921648	0.266212
chr1:110046751:110047458 STRIP1	-0.0469875	0	-0.0525881	-0.266126
chr2:44218537:44232316 PPM1B	-0.0834816	0	-0.115492	-0.266105
chr6:122796968:122804909 SMPDL3A	0	0	0	-0.265843
chr17:75491455:75491691 TMEM94	0	0	0	0.26566
chr17:75491467:75491691 TMEM94	0	0	0	-0.26566
chr9:37854982:37857241 DCAF10	0	0	0	0.265624
chr2:61314153:61314585 USP34	-0.0952052	0	-0.141575	-0.265616
chr17:60158446:60159230 CA4	0.122551	0	0	0.265426
chr18:34864062:34866111 DTNA	0.129116	0	0.157692	0.265395
chr18:34864062:34875239 DTNA	-0.129116	0	-0.157692	-0.265395
chr2:235908906:235968462 AGAP1	0.119025	0	0.147089	0.265344
chr1:149002026:149002850 PDE4DIP	-0.105696	0	0	-0.265176
chr12:6724818:6728223 COPS7A	0	0	0	-0.264979
chr12:123651056:123652524 GTF2H3	-0.0624606	0	0	-0.264854
chr12:123651056:123652532 GTF2H3	0.0624606	0	0	0.264854
chr22:49787494:49794034 BRD1	0	0	0	0.26482
chr2:206274946:206279540 ZDBF2	-0.127964	0	-0.109204	-0.26458
chr11:113827360:113828844 USP28	0.138091	0	0.136496	0.264547
chr4:44703142:44707752 YIPF7,GNPDA2	0	0	0.0839508	0.264532
chr2:38847073:38854054 DHX57	-0.0433751	0	-0.0795665	-0.264496
chr19:58279147:58285717 ZNF544,CTD-3138B18.4,ZNF8,AC010642.1	0.151807	0	0.134946	0.264454
chr5:37721215:37724934 WDR70	0	0	0	-0.264433
chr11:104563708:104609237 RP11-886D15.1	-0.0817607	0	-0.0817453	-0.264289
chr2:39299801:39309461 MAP4K3	-0.122427	0	-0.0978359	-0.264055
chrX:45061419:45063422 KDM6A	0	0	-0.0701419	-0.263907
chr10:49747208:49750839 OGDHL	0	0	0	-0.26387
chr1:88955225:88961381 KYAT3	0	0	0	-0.263846
chr3:196712644:196716858 PIGX	0.0853686	0	0	0.263828
chr3:196713124:196716858 PIGX	-0.0853686	0	0	-0.263828
chr12:57614400:57614689 ARHGEF25	-0.0908433	0	-0.072894	-0.263796
chr17:32360967:32362914 ZNF207	-0.114722	0	-0.118978	-0.263715
chr2:95916171:95917855 ANKRD36C	0	0	0	-0.263421
chr12:88115182:88118483 CEP290	-0.0586141	0	-0.0836047	-0.263414
chr22:20143756:20145229 ZDHHC8	0	0	-0.263232	0
chr22:20143756:20147021 ZDHHC8	0	0	0.263232	0
chr11:61416519:61419922 CPSF7	0	0	-0.127034	-0.263143
chr11:61416519:61419949 CPSF7	0	0	0.127034	0.263143
chr11:113214511:113231645 NCAM1	-0.0980604	0	-0.111555	-0.262867
chr9:95978215:96004520 ERCC6L2	0	0	0.0644013	0.262591
chr18:79904183:79915387 PQLC1	-0.153225	0	-0.100061	-0.262567
chr16:75617272:75620266 ADAT1	0	0	0	-0.262556
chr21:37150170:37151893 TTC3	-0.0581869	0	-0.0604672	-0.262513
chr2:70989816:70991830 AC007040.11,TEX261	0.0167614	0	0.0122064	0.262453
chr3:197579299:197613225 AC024560.3	0.148693	0	0	0.262415
chr9:13121932:13123153 MPDZ	-0.1003	0	-0.0620349	-0.262311
chr4:44678787:44680694 GUF1	0	0	-0.136429	-0.262225
chr7:38215105:38217188 STARD3NL	0	0	0	-0.262176
chr16:15086454:15091315 RRN3	0.129792	0	0.094396	0.26211
chr14:73355766:73409937 NUMB	-0.0909989	0	0	-0.262
chr1:1336515:1337977 DVL1	0	0	-0.144703	-0.261955
chr8:17361274:17413269 MTMR7	0	0	0	-0.261881
chr5:95503003:95506934 TTC37	-0.0466592	0	-0.0608872	-0.261872
chr4:103049020:103050240 SLC9B2	0.103091	0	0	0.261818
chr19:40799262:40800339 RAB4B,RAB4B-EGLN2,EGLN2	0	0	0	-0.261802
chr1:144955601:144995008 SRGAP2B	0	0	0	-0.261603
chr3:185285643:185428497 MAP3K13	-0.124018	0	0	-0.261391
chr20:59882165:59885928 SYCP2	0	0	0	-0.261389
chr17:73205680:73206154 COG1	0.0475167	0	0.0545661	0.261254
chr7:64982116:64989947 ZNF117,ERV3-1	-0.163913	0	-0.103752	-0.26101
chr15:99671454:99674393 MEF2A	0.0871908	0	0.0910995	0.260912
chr16:1668184:1669001 CRAMP1,LA16c-431H6.6	0.129847	0	0	0.260698
chr16:1668193:1669001 CRAMP1,LA16c-431H6.6	-0.129847	0	0	-0.260698
chr6:52264786:52266075 MCM3	0.242562	0	0.260686	0
chr3:195870205:195872276 TNK2	0.0563311	0	0.107928	0.260604
chr3:195870378:195872276 TNK2	-0.0563311	0	-0.107928	-0.260604
chr13:35117493:35118377 NBEA	-0.0782428	0	-0.0776908	-0.260482
chr12:121761738:121773421 TMEM120B	0	0	0	-0.260447
chr16:22437492:22454702 SMG1P1	-0.0807144	0	-0.088343	-0.260426
chr14:45109780:45110094 PRPF39	-0.119924	0	0	-0.260393
chr17:16006568:16025017 TTC19	0.159564	0	0.168082	0.260306
chr2:61186497:61186617 AHSA2	0.153647	0	0.217738	0.260252
chr3:62478416:62491339 CADPS	0	0	-0.112256	-0.260227
chr17:4718023:4718612 ARRB2	0	0	0	-0.260055
chr4:43778731:43796550 NA	-0.0896092	0	0	-0.260045
chr15:28655420:28655796 HERC2P9	-0.260043	0	-0.24035	0
chr5:158699142:158707979 EBF1	0	0	0	-0.259902
chr1:1267992:1272853 UBE2J2	-0.0694046	0	-0.0665481	-0.25979
chr6:4117451:4125250 ECI2	-0.0481883	0	-0.0647016	-0.259599
chr18:63403826:63407432 VPS4B	0.0766136	0	0.109524	0.25957
chr15:72250092:72251207 PARP6	-0.0506043	0	-0.0951907	-0.259524
chr2:61311910:61314001 USP34	-0.10742	0	-0.123441	-0.259508
chr3:9662375:9671048 MTMR14	0	0	-0.0622085	-0.259424
chr13:40749281:40756873 MRPS31	0	0	0	-0.259418
chr11:47616142:47622701 MTCH2	0	0	0	-0.259384
chr11:47618919:47622701 MTCH2	0	0	0	0.259384
chr2:69988505:69996686 PCBP1-AS1	0	0	0	-0.259265
chr1:160283109:160283530 PEX19,RP11-574F21.3	0.089843	0	0.0812235	0.259243
chr11:76458358:76463821 EMSY	0	0	0	-0.25908
chr14:23306894:23307192 BCL2L2,BCL2L2-PABPN1	0.0366986	0	0.070253	0.259023
chr1:220653352:220661812 MARK1	-0.164752	0	0	-0.258853
chr21:32751218:32755213 PAXBP1	0	0	0	0.258757
chr21:32751218:32755230 PAXBP1	0	0	0	-0.258757
chr1:204537497:204538209 MDM4	0.0624078	0	0	0.258651
chr1:16914137:16930286 CROCC	0	0	0	-0.258622
chr10:42523738:42550557 ZNF37BP	0.17498	0	0	0.258582
chr1:62477825:62487398 DOCK7	0	0	0	0.258519
chr1:62485653:62487398 DOCK7	0	0	0	-0.258519
chr6:4133701:4135511 ECI2	0	0	-0.161673	-0.258487
chr6:4133711:4135511 ECI2	0	0	0.161673	0.258487
chr16:1665138:1666422 CRAMP1,LA16c-431H6.6	0	0	0	-0.258468
chr15:65906141:65913737 MEGF11	0	0	0	-0.25822
chr2:101282057:101288973 RNF149	-0.0788792	0	-0.0736812	-0.258018
chr1:113896465:113898718 AP4B1	-0.0324881	0	-0.0964821	-0.258002
chr6:143333445:143339639 AIG1	0.0601857	0	0.0766196	0.25775
chr6:73480126:73480675 MTO1	0.0977868	0	0.127936	0.257671
chr13:28280541:28281315 PAN3	0.0987009	0	0.0706532	0.257643
chrX:130022977:130028635 BCORL1	0	0	0.167668	0.257632
chr9:136050580:136095189 NACC2	0	0	0.10739	0.257468
chr9:125355857:125360528 GAPVD1	0	0	0	-0.257463
chr8:102300151:102304043 UBR5	0.142129	0	0.171203	0.257276
chr2:95954005:95958591 ANKRD36C	-0.0519382	0	-0.0675918	-0.257258
chr3:53877751:53879939 ACTR8	-0.0462399	0	-0.0499246	-0.257198
chr16:31109783:31110077 BCKDK	0	0	0.0879743	0.257127
chr16:31109788:31110077 BCKDK	0	0	-0.0879743	-0.257127
chr1:109659110:109661165 GSTM4	0.138269	0	0	0.257083
chr1:16484464:16485569 CROCCP3	0	0	0	-0.256997
chr7:87181341:87182017 DMTF1	0	0	-0.0683173	-0.256892
chr19:10805967:10812264 DNM2	0.123002	0	0	0.256874
chr18:58165861:58245427 NEDD4L	0	0	-0.110966	-0.256548
chr10:122392372:122393181 PLEKHA1	0	0	0	-0.256414
chr17:32035639:32047761 LRRC37B	-0.0390735	0	0	-0.25641
chr2:60794191:60794710 PAPOLG	0.11754	0	0.0956039	0.256302
chr12:105152451:105157236 KIAA1033	0	0	0	-0.256156
chr4:88019571:88036220 PKD2	0	0	0	0.256082
chr19:8821306:8821442 ZNF558	-0.234679	0	-0.227482	-0.256018
chr19:8821306:8822003 ZNF558	0.234679	0	0.227482	0.256018
chr11:126266081:126266476 SRPRA	-0.0448558	0	-0.0410485	-0.255976
chr1:75724817:75732644 ACADM	-0.147349	0	0	-0.255684
chr14:58470723:58474607 KIAA0586	-0.124101	0	-0.122384	-0.255374
chr3:184186875:184187364 ABCF3	-0.0840025	0	-0.0728485	-0.255313
chr3:184186875:184187397 ABCF3	0.0840025	0	0.0728485	0.255313
chr1:222719359:222724092 BROX	0	0	0	-0.255207
chr20:5109445:5112961 TMEM230	0.148662	0	0.113357	0.255053
chr8:144882836:144889581 ZNF250	-0.131976	0	0	-0.254967
chr6:46681639:46695821 TDRD6	0	0	0	0.254854
chr6:46694174:46695821 TDRD6	0	0	0	-0.254854
chr1:160283639:160285055 PEX19,RP11-574F21.3	0.0934689	0	0.102121	0.254736
chr2:71380565:71396141 ZNF638	0.0598716	0	0.0905247	0.254568
chr3:62492446:62499162 CADPS	-0.116867	0	-0.137346	-0.254379
chr17:64514358:64516723 CEP95	0	0	0	0.254318
chr20:3889728:3907926 PANK2	0.157272	0	0.166502	0.254241
chr12:1781076:1783880 ADIPOR2	0.113117	0	0	0.254163
chr3:56558910:56563684 CCDC66	-0.0683251	0	-0.0732668	-0.253983
chr1:75794233:75794510 RABGGTB	0.105613	0	0.0661401	0.253957
chr1:75794233:75795213 RABGGTB	-0.105613	0	-0.0661401	-0.253957
chr20:43459420:43459771 SRSF6	-0.157262	0	0	-0.253637
chr11:64607500:64620294 NRXN2	0.11953	0	0.102799	0.253585
chr2:233355659:233388257 DGKD	-0.0471532	0	-0.108387	-0.253483
chr2:24221066:24246129 ITSN2	-0.125729	0	0	-0.253368
chr2:24242206:24246129 ITSN2	0.125729	0	0	0.253368
chr10:22318306:22318653 COMMD3,COMMD3-BMI1	0.0989794	0	0.0341143	0.2533
chr1:20779911:20787195 HP1BP3	0.136735	0	0.140947	0.253148
chr11:113271876:113275267 NCAM1	-0.0823492	0	-0.0829563	-0.253059
chr5:138875738:138886212 CTNNA1	-0.133837	0	0	-0.253001
chr6:126008472:126011253 TRMT11	-0.107236	0	-0.135525	-0.252792
chr1:83906463:83907456 TTLL7	0.076868	0	0.0996829	0.252707
chr1:83906523:83907456 TTLL7	-0.076868	0	-0.0996829	-0.252707
chr15:56704267:56707082 ZNF280D	0.129706	0	0.117085	0.252667
chr22:17791301:17808844 MICAL3,XXbac-B461K10.4	-0.00421278	0	0	-0.252652
chr22:46346544:46350291 TRMU	0	0	-0.144289	-0.252567
chr18:50275245:50275600 MBD1	0	0	-0.187071	-0.252514
chr19:10544325:10544629 ATG4D	-0.0740822	0	0	-0.252321
chr3:197603717:197613225 AC024560.3	-0.0902544	0	0	-0.252228
chr22:49777813:49787390 BRD1	0.0132372	0	0.0715083	0.252075
chr13:52456607:52461058 CKAP2	0	0	-0.0855752	-0.252069
chrX:85894284:85911261 CHM	-0.0325431	0	-0.0608155	-0.252027
chr19:9758764:9762082 ZNF846	0	0	0	-0.251976
chrX:155889612:155898112 VAMP7	-0.0859764	0	0	-0.251938
chr10:97481042:97498273 MMS19	0	0	0	-0.251851
chrX:115123192:115123945 LRCH2	0	0	-0.165727	-0.251795
chr8:102836390:102838744 AZIN1	0.0720497	0	0.0836988	0.251649
chr8:102836541:102838744 AZIN1	-0.0720497	0	-0.0836988	-0.251649
chr6:83854161:83864175 CYB5R4,RIPPLY2	0	0	-0.0987653	-0.25158
chr9:70300200:70314742 SMC5	-0.0583857	0	-0.0823974	-0.251455
chr14:45096758:45096887 PRPF39	0.0962889	0	0.131506	0.251396
chr15:90935330:90935544 UNC45A	0	0	0	0.251359
chr15:90935375:90935544 UNC45A	0	0	0	-0.251359
chr3:142376795:142380082 XRN1	-0.124566	0	-0.101225	-0.251182
chr10:73800170:73800296 ZSWIM8	0	0	0	0.25115
chr10:73800194:73800296 ZSWIM8	0	0	0	-0.25115
chr4:26584292:26637211 TBC1D19	0	0	0	-0.251084
chr7:128801473:128804650 CCDC136	0.127678	0	0.140455	0.251076
chr20:63941208:63943653 UCKL1	0	0	-0.123787	-0.251002
chr3:42621516:42630546 NKTR	-0.15021	0	0	-0.25092
chr20:497780:499833 CSNK2A1	-0.0239134	0	-0.0266854	-0.250784
chr2:97536058:97536300 ANKRD36B	-0.17187	0	-0.14292	-0.250725
chr3:197297235:197297673 DLG1	0.0586083	0	0.102027	0.250703
chr11:113805046:113806489 USP28	0.0275284	0	0.124534	0.250542
chr17:7312839:7313029 GPS2,RP11-542C16.2	0	0	0	0.250494
chr2:85596649:85596822 RNF181	0	0	0	0.250487
chr6:149566534:149572285 GINM1	0.0539246	0	0.0964818	0.250374
chr6:149566708:149572285 GINM1	-0.0539246	0	-0.0964818	-0.250374
chr16:7709131:7709494 RBFOX1	-0.0609847	0	-0.103003	-0.250305
chr13:31141259:31143792 HSPH1	0.0441342	0	0.11824	0.250245
chr9:92229126:92240856 IARS	0	0	0	0.250155
chr20:3800865:3800971 CDC25B	0.0576178	0	0.0686557	0.25004
chr5:160253798:160255549 CCNJL	0.179321	0	0.17386	0.250026
chr15:72351234:72355559 HEXA,RP11-106M3.2	-0.0603343	0	-0.0530857	-0.249914
chr20:32429431:32431321 ASXL1	-0.0910384	0	0	-0.249852
chr1:62578966:62586507 DOCK7	-0.168331	0	-0.102984	-0.249846
chr2:111864951:111872630 ANAPC1	-0.112521	0	-0.0720569	-0.24984
chr9:128250940:128254654 DNM1	-0.106925	0	-0.123288	-0.249797
chr5:850602:878355 BRD9	0	0	-0.184983	-0.249766
chr5:876212:878355 BRD9	0	0	0.184983	0.249766
chr19:14705170:14706091 ZNF333	0	0	0.249702	0
chr19:14705170:14706686 ZNF333	0	0	-0.249702	0
chr14:23081836:23090522 ACIN1	0	0	0	-0.249515
chr1:53228954:53235577 MAGOH	-0.0846869	0	0	-0.249492
chr19:1010895:1010991 TMEM259	-0.0684375	0	-0.0929435	-0.249316
chr19:1010895:1011096 TMEM259	0.0684375	0	0.0929435	0.249316
chr22:22304114:22306833 BMS1P20,LL22NC03-80A10.6	0	0	0	0.249314
chr1:31727605:31728182 ADGRB2	-0.0882356	0	0	-0.249136
chr15:90903432:90904190 MAN2A2	0	0	0	0.248922
chr11:34115884:34118180 NAT10	0.0372654	0	0	0.248902
chr3:138476492:138477774 ESYT3	0	0	0.156547	0.248782
chr8:73027052:73030336 TERF1	0	0	0	0.248634
chr8:100533311:100559038 ANKRD46	0	0	-0.0708561	-0.248615
chr12:57783283:57786163 RP11-571M6.15,TSFM	0	0	-0.0496365	0.248592
chr9:100442356:100498765 MSANTD3,MSANTD3-TMEFF1,TMEFF1	-0.0791676	0	0	-0.248519
chr10:35071339:35090179 CUL2	0.124508	0	0.115493	0.248487
chr1:167220958:167332470 POU2F1	0	0	0	-0.248461
chr18:47896809:47930361 SMAD2	0	0	0	-0.248443
chr17:82023863:82024693 LRRC45	0	0	0	-0.24831
chr16:31110499:31111091 BCKDK	0	0	0	-0.248202
chr19:6442159:6444151 SLC25A23	0	0	0	0.248156
chr5:6620298:6622016 NSUN2	0.0854537	0	0.0690245	0.248136
chr2:241268541:241315570 HDLBP	0	0	0	-0.248101
chr17:2957794:2963430 RAP1GAP2	0	0	0	-0.247844
chr7:92042771:92043282 AKAP9	0.0799761	0	0.11934	0.247827
chr3:134482931:134485320 ANAPC13	0	0	-0.0869705	-0.247725
chr3:134482931:134485952 ANAPC13	0	0	0.0869705	0.247725
chr2:256690:260085 SH3YL1	-0.0716189	0	-0.0908202	-0.247609
chr6:10702639:10704507 PAK1IP1	0	0	0	-0.247575
chr5:39383271:39388799 DAB2,C9	0	0	-0.0664937	-0.247528
chr5:5182305:5187725 ADAMTS16	-0.0626045	0	-0.0563057	-0.247382
chr3:33577264:33581821 CLASP2	0.0971361	0	0.0798648	0.247366
chr15:99690428:99703362 MEF2A	0	0	0	0.24726
chr17:16348685:16349931 CENPV	0.134514	0	0.139052	0.247218
chr17:16349333:16349931 CENPV	-0.134514	0	-0.139052	-0.247218
chr1:154331678:154331784 ATP8B2	-0.0203225	0	0	-0.247208
chr1:154331678:154331954 ATP8B2	0.0203225	0	0	0.247208
chr2:9297445:9320288 ASAP2	-0.0678382	0	0	-0.24711
chr7:139279360:139283024 UBN2	-0.105374	0	0	-0.247091
chr12:123724791:123727783 ATP6V0A2	-0.0892158	0	-0.0757788	-0.247084
chr3:138464515:138467561 ESYT3	0	0	-0.0334109	-0.24707
chr8:58635546:58642984 NSMAF	0.247065	0	0	0.197875
chr4:13588792:13590386 BOD1L1	0.0273571	0	0.0565659	0.247024
chr3:111999114:111999247 TAGLN3	0	0	0	-0.247015
chr3:111999114:111999421 TAGLN3	0	0	0	0.247015
chr4:145111064:145112239 ABCE1	0.0482989	0	0.0786333	0.246947
chr11:93168171:93180797 SLC36A4	0.149445	0	0.156618	0.246892
chr1:9755309:9773272 CLSTN1	-0.0864872	0	-0.0960753	-0.246784
chr10:100490883:100495385 SEC31B	0	0	-0.122851	-0.246764
chr19:34678103:34678737 ZNF302	-0.116057	0	-0.0656409	-0.246752
chr20:37236709:37238402 RPN2	0	0	0.069716	0.246738
chr2:95935644:95938829 ANKRD36C	0.0918563	0	0.111909	0.246676
chr1:62148390:62160908 PATJ	-0.139508	0	-0.0786468	-0.246606
chr1:148991973:148992255 PDE4DIP	0	0	0	-0.246558
chr1:148991973:148998143 PDE4DIP	0	0	0	0.246558
chr5:36177292:36178598 SKP2	-0.207772	0	-0.244873	-0.246513
chr4:2644686:2646685 FAM193A	-0.0481228	0	-0.0980922	-0.246475
chr3:10378410:10388277 ATP2B2	-0.147911	0	-0.0835894	-0.24627
chr3:138349032:138372866 MRAS	0	0	-0.124012	-0.246262
chr19:42370831:42375507 MEGF8	-0.0849491	0	-0.102461	-0.246229
chr12:110387892:110395101 ANAPC7,RP11-478C19.2	-0.0703427	0	-0.095019	-0.246022
chr2:241268541:241315102 HDLBP	0	0	0	0.245996
chr5:179614959:179616126 HNRNPH1	-0.0486103	0	-0.0545284	-0.245873
chr6:135285647:135300500 AHI1	0	0	-0.0589918	-0.245589
chr14:31205957:31207016 HECTD1	0	0	0	-0.245556
chr14:31205957:31207391 HECTD1	0	0	0	0.245556
chr3:179377168:179377344 MFN1	0.0990091	0	0	0.245549
chr4:15682021:15686236 FAM200B	-0.100155	0	0	-0.245404
chr12:67649182:67657106 DYRK2	0	0	0	-0.245354
chr16:11758539:11761910 ZC3H7A	0	0	-0.0509226	-0.245284
chr22:41281082:41285986 RANGAP1	0.135035	0	0	0.245244
chr11:63908304:63908877 MARK2	0.121252	0	0.0842564	0.245241
chr4:169561737:169561832 NEK1	0.114511	0	0.0633624	0.245162
chr10:125725838:125729358 EDRF1	0	0	0	0.245144
chr18:35241690:35242391 ZNF397	0	0	0.104143	0.245126
chr5:43068217:43079900 ZNF131	0	0	0	-0.245098
chr19:2112931:2113336 AP3D1	0	0	0	-0.244976
chr19:2112967:2113336 AP3D1	0	0	0	0.244976
chr19:45770640:45771568 DMPK	0	0	0	-0.244714
chr9:97362441:97365673 RP11-23J9.4,CCDC180	-0.171265	0	-0.244712	0
chr17:82253244:82255429 CSNK1D	0.102933	0	0	0.244698
chr13:98794748:98797115 DOCK9	0	0	-0.144189	-0.244653
chr11:101981964:101986832 CEP126	0	0	0	0.244542
chr22:50283990:50284573 PLXNB2	0	0	0	-0.244497
chr1:149021153:149026715 PDE4DIP	0	0	0	-0.244452
chr3:170293508:170297304 PRKCI	-0.0323453	0	-0.0421541	-0.244327
chr1:41006094:41008659 CTPS1	-0.226925	0	-0.244317	0
chr16:11763659:11765489 ZC3H7A	-0.0194048	0	-0.0777503	-0.24422
chr19:15397855:15399302 AKAP8L	0	0	0	-0.244205
chr20:37238449:37241303 RPN2	0	0	0.122875	0.244198
chr14:39149570:39151746 TRAPPC6B	0	0	0	-0.244174
chr14:39150381:39151746 TRAPPC6B	0	0	0	0.244174
chr11:43892129:43901516 ALKBH3	0.103845	0	0	0.24411
chr6:30296237:30314269 HCG18,HCG17	0	0	0	-0.243882
chr19:35775664:35777824 ARHGAP33	0	0	0	-0.243799
chr7:117745930:117746013 CTTNBP2	0.0580118	0	0.105508	0.243794
chr9:95997413:96004520 ERCC6L2	0	0	-0.0804984	-0.243793
chr19:54449306:54452093 LENG8	0	0	0	-0.243566
chr2:55922447:55923711 EFEMP1	0	0	0	-0.243281
chr20:35632234:35632311 CPNE1	0.0649788	0	0.0912236	0.243258
chr19:34683238:34683992 ZNF302	-0.159839	0	-0.140916	-0.243178
chr19:34683238:34684252 ZNF302	0.159839	0	0.140916	0.243178
chr3:127576893:127579740 TPRA1	-0.0576789	0	0	-0.243157
chr10:37971807:37976506 ZNF25	0.0945159	0	0.11871	0.243139
chr17:40637572:40645796 SMARCE1	-0.0556624	0	-0.0105424	-0.243079
chr19:36556197:36589615 ZNF529	0	0	-0.0269745	-0.242916
chr3:195963421:195965429 SDHAP1	0.0988893	0	0.111723	0.242901
chr4:116949678:116952660 NA	0	0	0.13132	0.242866
chr15:40391554:40391949 KNSTRN	0	0	0	0.24285
chr9:2639981:2641377 VLDLR-AS1,VLDLR	0.114916	0	0	0.242778
chr4:56272492:56307535 KIAA1211	0.242738	0	0.227731	0
chr12:122490567:122492715 ZCCHC8	-0.00915399	0	0.0695187	0.242661
chr2:219228053:219228434 ATG9A	0.0707831	0	0.0852426	0.242571
chr10:100235764:100238022 CWF19L1	-0.117202	0	-0.0823674	-0.242545
chr6:73480367:73480675 MTO1	-0.103543	0	-0.111592	-0.242373
chr9:37899950:37904068 SLC25A51,RP11-613M10.9	0	0	0	0.24219
chr8:73030395:73032042 TERF1	0	0	0	0.242182
chr20:41160153:41162452 PLCG1	0.064337	0	0	0.242119
chr12:72264621:72271823 TRHDE-AS1	0.0711992	0	0.0384561	0.242104
chr14:60092419:60114700 PCNX4	-0.11758	0	-0.129612	-0.241982
chr4:176139974:176148133 WDR17	-0.0523844	0	0	-0.241803
chr15:34147289:34148632 KATNBL1	-0.0322803	0	0	-0.241712
chr10:76877890:76887291 KCNMA1	0	0	0	-0.241692
chr14:60879835:60982508 MNAT1,RP11-193F5.1,SLC38A6	-0.0644994	0	-0.0933478	-0.24168
chr3:138476492:138476818 ESYT3	0	0	-0.112642	-0.241648
chr7:35667588:35694184 HERPUD2	-0.0816364	0	-0.0866911	-0.241576
chr9:97675587:97684923 XPA	0.128975	0	0.133012	0.241503
chr1:85259061:85259358 C1orf52	0.123003	0	0.103507	0.241474
chr19:1422396:1428842 DAZAP1	-0.119673	0	0	-0.241467
chr1:151442205:151459152 POGZ	0	0	0	-0.241276
chr2:38848402:38854054 DHX57	0.0552651	0	0.0359295	0.241258
chr2:86132424:86133346 PTCD3	-0.00813454	0	-0.0301081	-0.241248
chr17:78171054:78171739 SYNGR2	-0.0668488	0	0	-0.241164
chr3:15573242:15582877 HACL1	-0.0355407	0	-0.0406595	-0.24104
chr17:17216503:17217069 RP11-45M22.4,FLCN	0.0643649	0	0.0751425	0.241011
chr3:43090609:43105836 POMGNT2	0.0996026	0	0.0840939	0.240892
chr14:52536793:52542371 TXNDC16	-0.0884176	0	-0.0929735	-0.240847
chr11:94972193:94973498 CWC15	0.0593467	0	0.0526639	0.24076
chr5:72314158:72320000 MRPS27	0	0	0	-0.240737
chr19:39827425:39828297 DYRK1B	0	0	0	-0.24067
chrX:55722285:55727307 RRAGB	0.0662259	0	0.0680928	0.240635
chr5:113534407:113539074 YTHDC2	0	0	-0.089428	-0.240451
chr9:78265543:78266442 CEP78	0	0	0	-0.240367
chr11:64361745:64361852 RPS6KA4	0.144411	0	0	0.240282
chr11:64361745:64361907 RPS6KA4	-0.144411	0	0	-0.240282
chr3:184290358:184290557 ECE2	0	0	0	0.240212
chr20:34860363:34861445 GGT7	0	0	0	-0.24018
chr9:100240240:100242570 INVS	0	0	0	-0.239932
chr7:78178102:78194874 MAGI2	-0.0878714	0	-0.145164	-0.239772
chr9:125332629:125337018 GAPVD1	-0.134693	0	-0.143307	-0.239761
chr10:34360259:34374874 PARD3	-0.0858523	0	0	-0.239689
chr2:50506617:50531227 NRXN1	-0.0503839	0	-0.09422	-0.23956
chr8:42306432:42314322 IKBKB	-0.0391854	0	-0.0860291	-0.239508
chr16:31091342:31094557 RP11-196G11.1,VKORC1	-0.0995715	0	0	-0.239166
chr2:69374113:69387065 GFPT1,NFU1	-0.109964	0	-0.107	-0.239137
chr10:73817554:73821682 CAMK2G	0	0	0	-0.239095
chr13:46148447:46150936 LCP1	0	0	0	-0.23908
chr2:134939062:134946101 CCNT2	-0.0739476	0	0	-0.239077
chr9:137023052:137024143 ABCA2	-0.221301	0	0	-0.239043
chr10:49738262:49742828 OGDHL	-0.0411641	0	-0.0467248	-0.239041
chr10:38010783:38016871 ZNF33A	-0.0532284	0	-0.0433119	-0.238975
chr10:110890670:110894412 PDCD4	-0.0344767	0	-0.0928198	-0.238928
chr19:12679922:12680161 DHPS	0.0901254	0	0.0638689	0.238882
chr22:23695517:23705429 GUSBP11,KB-1572G7.2,AP000347.2	0.129838	0	0.154188	0.238872
chr12:6549484:6549756 IFFO1	0	0	0	-0.238566
chr6:30289494:30296132 HCG18	-0.115277	0	-0.126184	-0.238561
chr6:34835464:34855617 UHRF1BP1	-0.0510706	0	0	-0.238448
chrX:140716289:140733878 LINC00632	0	0	0.107348	0.238426
chr2:3465695:3478846 TRAPPC12	0	0	0	-0.238395
chr10:16782084:16817315 RSU1	0	0	-0.0723255	-0.238386
chr20:63941208:63942470 UCKL1	0	0	0.104163	0.238244
chr17:55043325:55047089 STXBP4	0	0	0	-0.238129
chr10:440996:472439 DIP2C	0.0460896	0	0.0410826	0.238102
chr16:3532841:3533099 CLUAP1	0	0	0.0925076	0.238045
chr8:81715114:81718182 ZFAND1	-0.121427	0	-0.154664	-0.238021
chr4:36229645:36255652 ARAP2	0	0	0	-0.23798
chr8:78678679:78689222 ZC2HC1A	-0.051943	0	-0.0903273	-0.23795
chr17:73203793:73205553 COG1	0.0334457	0	0.0461479	0.237857
chr1:46575020:46576575 MKNK1	0.0473842	0	0.0715956	0.237675
chr3:33560971:33570727 CLASP2	0	0	0.106915	0.23767
chr13:19852190:19863450 ZMYM5	0	0	0	-0.237588
chr8:132638107:132656830 LRRC6	0	0	0	-0.237567
chr2:215349249:215349536 ATIC	0.119304	0	0.0969714	0.237564
chr2:215349249:215362646 ATIC	-0.119304	0	-0.0969714	-0.237564
chr4:70950811:70958874 MOB1B	-0.0732786	0	-0.104643	-0.237434
chr13:25249492:25251853 MTMR6	-0.0399847	0	-0.0409835	-0.237401
chr2:113715195:113719154 SLC35F5	0	0	0	-0.237323
chr1:215577728:215579000 KCTD3	-0.0463664	0	-0.038051	-0.237234
chr19:58086266:58087316 ZSCAN18	-0.013853	0	-0.0273758	-0.237227
chr14:20460845:20461163 TMEM55B	0	0	0	-0.237099
chr14:20460845:20461184 TMEM55B	0	0	0	0.237099
chr8:47702015:47712662 SPIDR	0.104345	0	0.0870793	0.237066
chr12:132822311:132828327 GOLGA3,CHFR	-0.0764316	0	-0.0783191	-0.236824
chr2:200987532:200988262 FAM126B	0.104289	0	0.0963211	0.236803
chr6:89618031:89623410 ANKRD6	-0.0805423	0	-0.0698915	-0.236753
chr12:6678710:6678946 ZNF384	0.0892826	0	0.0886446	0.236681
chr16:11768501:11769031 ZC3H7A	0.101949	0	0.097144	0.236628
chr12:111464715:111470108 ATXN2	0.0835578	0	0.0930377	0.236585
chrX:10567603:10677465 MID1	0	0	0	0.236535
chr22:48576571:48646597 FAM19A5	-0.112974	0	-0.140473	-0.236521
chr10:123034515:123040466 ACADSB	-0.107059	0	-0.118435	-0.236514
chr1:155268359:155269488 CLK2	0	0	0	-0.236103
chr6:151423631:151430138 RMND1	0	0	0	-0.236033
chr7:72830813:72831602 SBDSP1	0.10145	0	0.10137	0.235999
chr4:113547716:113552031 CAMK2D	-0.0940857	0	-0.102722	-0.235867
chr22:26470922:26472302 HPS4	-0.0548834	0	-0.0838225	-0.235837
chr19:54451382:54452093 LENG8	0	0	0	0.235646
chr3:12542022:12560757 MKRN2OS	0	0	0	-0.235559
chr15:22839174:22839655 NIPA2	-0.109503	0	-0.065966	-0.235423
chr9:14801874:14806661 FREM1	-0.0257903	0	-0.0311343	-0.235355
chr6:43026141:43027130 RRP36	0	0	0	-0.235309
chr6:43026141:43027178 RRP36	0	0	0	0.235309
chr11:68892993:68893322 MRPL21	0	0	0	-0.235212
chr11:68892993:68893403 MRPL21	0	0	0	0.235212
chr12:95296258:95299094 VEZT	0.0816662	0	0.119053	0.235188
chr11:2972243:2976024 NAP1L4	0	0	0.0626511	0.235181
chr11:2972279:2976024 NAP1L4	0	0	-0.0626511	-0.235181
chr8:89946295:89953244 NBN	0	0	-0.0308481	-0.23502
chr12:113244743:113260368 TPCN1	0	0	0	-0.235003
chr15:77286504:77365163 PEAK1	0.0938477	0	0.112771	0.234986
chr13:98824504:98826830 DOCK9	-0.142184	0	-0.144657	-0.234959
chr7:75441647:75474704 POM121C	0	0	0	-0.234854
chr11:502249:507113 RNH1	-0.0528332	0	-0.0511549	-0.234796
chr10:120890009:120900029 WDR11	-0.100221	0	-0.10611	-0.234772
chr22:22307021:22309736 LL22NC03-80A10.6,BMS1P20	0	0	-0.0468764	-0.234722
chr1:70231975:70232268 SRSF11	0.0698847	0	0.0798542	0.234678
chr10:69495689:69498280 TSPAN15	0.064538	0	0.0736345	0.234664
chr11:71448885:71455110 RP11-660L16.2,NADSYN1	-0.108897	0	0	-0.23445
chr16:57173869:57185821 FAM192A	0.0411919	0	0.0360077	0.234409
chr9:121095018:121096422 CNTRL	0.104973	0	0.141148	0.234321
chr14:51701135:51702512 FRMD6	0	0	-0.157628	-0.234249
chr16:88892485:88901504 CBFA2T3	-0.11625	0	-0.113945	-0.234062
chr12:110019328:110025742 ANKRD13A	-0.157719	0	-0.0331754	-0.233984
chr17:44322528:44323284 SLC25A39	0	0	0	-0.233978
chr7:105638609:105642838 ATXN7L1	-0.128119	0	-0.0982751	-0.233894
chr2:39035310:39035390 SOS1	-0.00149742	0	0.0470353	0.233786
chr16:74349015:74350617 RP11-252A24.2	0	0	-0.0894604	-0.233783
chr8:123267386:123274217 ZHX1,ZHX1-C8orf76	0.114296	0	0.11395	0.233675
chr15:63259692:63263527 RAB8B	-0.0691476	0	0	-0.233663
chr17:54961312:54963306 COX11	-0.141091	0	-0.159228	-0.23356
chr9:130695593:130697582 EXOSC2	0	0	0	0.233516
chr9:130695606:130697582 EXOSC2	0	0	0	-0.233516
chr10:101035667:101036003 SFXN3	0.114905	0	0	0.233478
chr16:57216173:57216904 RSPRY1	0.089118	0	0	0.233474
chr4:150321368:150325809 LRBA	0	0	0	0.23343
chr4:150321383:150325809 LRBA	0	0	0	-0.23343
chr18:35241109:35242391 ZNF397	0	0	-0.0926518	-0.233382
chr3:32530328:32530461 DYNC1LI1	0.0582804	0	0.0186347	0.23329
chr7:128626530:128629372 NA	0	0	0	-0.233235
chr14:24158199:24160239 RNF31,RP11-468E2.4	0	0	0	-0.233152
chr11:115178775:115214608 CADM1	-0.068531	0	-0.0881573	-0.233129
chr4:75490701:75491724 RCHY1	-0.107352	0	-0.0926741	-0.233125
chr15:74904712:74905154 FAM219B	-0.120201	0	0	-0.232922
chr6:135300558:135318519 AHI1	0	0	0	-0.232851
chr15:73563245:73570150 NPTN	0.0801668	0	0.102551	0.232824
chr4:176111703:176119867 WDR17	-0.0598323	0	-0.0775249	-0.232776
chr9:85975157:85977363 NAA35	-0.041925	0	-0.0450438	-0.232739
chr12:122489463:122490462 ZCCHC8	0.113973	0	0.0521856	0.232621
chr14:72629736:72674240 DPF3	0.0940731	0	0.114762	0.232506
chr4:25394374:25394671 ANAPC4	0.111781	0	0	0.232473
chr20:9711435:9838762 PAK5	0	0	0	-0.232377
chr4:17962032:17972820 LCORL	-0.0487209	0	-0.0553117	-0.232268
chr16:4673657:4681550 MGRN1	-0.0418766	0	-0.0578927	-0.232177
chr12:113226964:113260368 TPCN1	0	0	0	0.232128
chr9:106930689:106932446 ZNF462	0.0453206	0	0	0.232126
chr6:150926295:150936804 MTHFD1L	0	0	0	0.232095
chr17:32369745:32373399 ZNF207	-0.085222	0	0	-0.231993
chr22:50782351:50783039 RABL2B	0	0	0	-0.231869
chr17:54905567:54912666 TOM1L1	0	0	0	-0.231869
chr9:127212719:127214751 RALGPS1	0	0	0	-0.231855
chr6:158982688:158986280 RSPH3	-0.076164	0	0	-0.231812
chr15:81265801:81269538 IL16	0	0	-0.0801963	-0.231801
chr5:32243599:32248772 MTMR12	0	0	0	-0.231797
chr10:29409658:29415357 SVIL-AS1	0.110575	0	0.110296	0.231748
chr10:29409683:29415357 SVIL-AS1	-0.110575	0	-0.110296	-0.231748
chr21:31339422:31463916 TIAM1	-0.0543165	0	-0.0980553	-0.231741
chr4:102726683:102727268 MANBA	0	0	0	-0.231726
chr1:85258722:85258935 C1orf52	0.0775765	0	0.0737011	0.2316
chr6:56464756:56466078 DST	0.0782615	0	0.0796713	0.231563
chr3:47396217:47405005 PTPN23	0	0	0	-0.231554
chr17:64514358:64519321 CEP95	0	0	0	-0.231472
chr7:158926463:158930455 WDR60	-0.0409498	0	0	-0.231452
chr1:93079531:93114688 MTF2	0	0	-0.0493886	-0.231422
chr22:41910719:41911216 SHISA8	0	0	0	-0.23131
chr5:178618778:178619838 CLK4	0	0	0.0885295	0.231299
chr2:87013119:87016302 PLGLB1	0	0	-0.20515	-0.230984
chr5:162149313:162153093 GABRG2	-0.118672	0	-0.0840623	-0.230866
chr10:119580010:119581922 TIAL1	0	0	0	-0.230846
chr7:74046767:74048142 ELN	0	0	0	-0.230712
chr7:100882241:100884070 SRRT	0	0	0	-0.2305
chr17:44212006:44212819 UBTF	0.084147	0	0.0846299	0.230421
chr10:91491307:91492352 HECTD2	0.0641092	0	0.10029	0.230351
chrX:20234814:20266564 RPS6KA3	0	0	0	-0.2302
chr3:183840640:183844231 PARL	-0.0471848	0	0	-0.230103
chr8:89909721:89914555 OSGIN2	0	0	-0.0408179	-0.230078
chr4:83458429:83459740 MRPS18C	0	0	0	0.230017
chr11:17430959:17432204 ABCC8	0.0980819	0	0.0666041	0.229903
chr9:92310675:92314267 NOL8	0	0	0	-0.229722
chr6:83118987:83119775 DOPEY1	0	0	0.10923	0.229585
chr3:113008430:113010643 NEPRO	0.0793373	0	0.0778665	0.229542
chr18:62139075:62143306 PIGN	0	0	0	-0.229534
chr11:112075643:112078215 C11orf57	0.136926	0	0	0.229374
chr14:35091207:35096558 PPP2R3C	0	0	0	-0.229327
chr3:42219390:42219494 TRAK1	-0.119897	0	0	-0.229194
chr16:87984259:88006090 BANP	0	0	-0.069253	-0.228912
chr15:74837798:74838266 ULK3	-0.0533351	0	0	-0.228846
chr15:52584944:52587056 FAM214A	-0.109184	0	-0.124954	-0.228813
chr13:77099013:77121373 MYCBP2	0	0	0	-0.228572
chr1:51750195:51760690 OSBPL9	0	0	0.096073	0.22852
chrX:48575667:48575815 RBM3	-0.120778	0	-0.14988	-0.228473
chr1:36293935:36296583 THRAP3	0.128918	0	0.0839431	0.22824
chr1:27330804:27330985 TMEM222	-0.0223162	0	-0.0644062	-0.228142
chr1:234607852:234608447 IRF2BP2	-0.125169	0	-0.130769	-0.228095
chr1:234607852:234608495 IRF2BP2	0.125169	0	0.130769	0.228095
chr2:172568817:172570726 PDK1	0.0495674	0	0.0538916	0.227995
chr6:43253708:43255049 TTBK1	0	0	0	-0.227991
chr20:64255870:64259942 PCMTD2	0	0	0.118774	0.227978
chr9:127684493:127690775 STXBP1	0.0756905	0	0.0750078	0.227901
chr22:26470813:26472302 HPS4	0.0764826	0	0.0757139	0.227793
chr5:32077606:32087131 PDZD2	0	0	0.052814	0.227705
chr5:32077606:32087167 PDZD2	0	0	-0.052814	-0.227705
chr21:28878333:28882160 N6AMT1	0	0	0	-0.227703
chr3:197538952:197546361 BDH1	0.115255	0	0.128213	0.227651
chr4:25748564:25757534 SEL1L3	0	0	0	0.227581
chr19:39457740:39458818 SUPT5H	-0.0957401	0	0	-0.227284
chr16:227336:229279 LUC7L	0	0	0	-0.227283
chr1:16367308:16393231 SZRD1	0	0	0	-0.227233
chr2:61295290:61296800 USP34	0.0355835	0	0.074159	0.227193
chr2:61295322:61296800 USP34	-0.0355835	0	-0.074159	-0.227193
chr14:77244455:77245940 TMEM63C	0	0	0.0158047	0.2271
chr8:42339069:42344953 POLB	0	0	0	0.227069
chr19:48234543:48240962 CARD8	-0.163927	0	-0.125292	-0.22696
chr3:33826580:33828838 PDCD6IP	0	0	0	-0.226955
chr1:155727738:155729042 DAP3	0.0460618	0	0.0513934	0.226904
chr17:36933511:36936564 RP11-445F12.1	0	0	-0.108507	-0.226854
chr15:41813101:41813621 MAPKBP1	0	0	-0.104082	-0.226706
chr4:101026061:101029166 PPP3CA	0.0722731	0	0.0483895	0.226627
chr20:43596522:43604183 IFT52	-0.0493338	0	0	-0.226499
chr14:100137644:100137740 EVL	0.0374624	0	0.0460134	0.226443
chr16:68316074:68324683 PRMT7	0	0	0	-0.226437
chr14:77116842:77196071 TMEM63C,RP11-463C8.4	0.117675	0	0.090608	0.226368
chr20:13794941:13798461 NDUFAF5	0.0606366	0	0.0954118	0.226339
chr2:24284843:24286212 ITSN2	0.0817539	0	0.122124	0.226335
chr12:70540957:70544557 PTPRB	-0.126064	0	-0.138553	-0.226266
chr1:70184914:70189092 LRRC40	-0.0781806	0	-0.0487374	-0.226149
chr16:24556447:24559505 RBBP6	0	0	0	-0.226115
chrY:18872834:18877068 TTTY14,USP9YP28	0	0	-0.15386	-0.226003
chr7:99909660:99917772 TRIM4	0.106422	0	0.0939844	0.2259
chr20:5109445:5112730 TMEM230	-0.108186	0	-0.069479	-0.225842
chr15:52584944:52587151 FAM214A	0.123055	0	0.117906	0.225636
chr1:111161296:111174879 CEPT1	0	0	-0.137781	-0.225636
chr6:17834071:17836878 KIF13A	0.0716247	0	0.11076	0.225506
chr6:17834168:17836878 KIF13A	-0.0716247	0	-0.11076	-0.225506
chr12:111452840:111456029 ATXN2	-0.0828043	0	0	-0.225502
chr13:49661208:49691254 EBPL	0	0	0	-0.225468
chr10:72216138:72230366 ANAPC16	-0.0626042	0	-0.056081	-0.225455
chrY:2976822:2977940 ZFY	0.132779	0	0.117701	0.225434
chr1:22086866:22089943 CDC42	0.10114	0	0.114413	0.225428
chr1:22086866:22091428 CDC42	-0.10114	0	-0.114413	-0.225428
chr13:51379572:51382029 INTS6	0.112345	0	0.129023	0.22537
chr18:13218094:13278105 LDLRAD4	0	0	-0.0465631	-0.225347
chr16:70316104:70324585 DDX19B,RP11-529K1.3	-0.0935876	0	-0.128932	-0.225269
chr13:110642521:110644065 CARS2	0.0960222	0	0.0929633	0.225255
chrX:6151771:6228541 NLGN4X	0	0	0	-0.225221
chr9:137145902:137149009 GRIN1	-0.0789004	0	0	-0.225207
chr12:122981266:122981595 ARL6IP4	0.0995371	0	0	0.225206
chr9:128755659:128771581 ZER1	-0.127485	0	-0.0935514	-0.225197
chr11:96358661:96358993 CCDC82	-0.0742146	0	-0.0737139	-0.22516
chr15:40389929:40391493 KNSTRN	0	0	0	0.225066
chr17:82658134:82659580 RAB40B	0	0	-0.0857112	-0.225065
chr2:228132085:228181567 SPHKAP	0.0834602	0	0.109917	0.225062
chr13:32031865:32078834 EEF1DP3,FRY	0.0112081	0	-0.0660641	-0.224989
chr7:128626530:128629394 NA	0	0	0	0.224868
chr6:13182686:13184799 PHACTR1	0	0	0	0.224851
chr7:102197305:102200071 CUX1	0	0	0	-0.224786
chr3:38242617:38242743 OXSR1	0	0	-0.0446724	-0.224752
chr17:44770048:44771584 ADAM11	0	0	0	0.224536
chrY:13366393:13369256 UTY	0	0	0.0937047	0.224502
chr6:25612886:25619447 LRRC16A	0	0	0.104871	0.22445
chr7:44013679:44016434 POLR2J4,RP5-1165K10.2	0	0	0	-0.224319
chr20:3787139:3797622 CDC25B	0	0	0	-0.224131
chr15:42559408:42561270 HAUS2	0.123856	0	0.184254	0.224119
chr1:41028726:41037362 SCMH1	0	0	-0.224006	0
chr18:37485607:37565356 CELF4	0.067547	0	0.0668121	0.22399
chr20:38518000:38521497 RALGAPB	0	0	0	-0.223985
chr1:19890533:19897540 OTUD3	0	0	0	-0.223903
chr7:92102826:92107293 AKAP9	-0.0400041	0	-0.0760139	-0.223899
chr10:124706887:124760386 FAM53B,METTL10,RP11-12J10.3	-0.0867536	0	0	-0.223863
chr1:77721901:77722024 USP33	0	0	-0.0766522	-0.223833
chr1:77721925:77722024 USP33	0	0	0.0766522	0.223833
chr3:157151930:157152177 CCNL1	0	0	0	0.223768
chr12:56475682:56477933 GLS2	-0.00781574	0	-0.0189172	-0.223764
chr3:33402904:33408690 UBP1	0	0	0.0741054	0.22374
chr22:19975757:19976706 ARVCF	0.0348992	0	0.0568868	0.22373
chr2:121410969:121425139 CLASP1	0	0	-0.0637948	-0.223644
chr7:141621801:141636960 AGK	-0.0292671	0	-0.0464457	-0.223508
chr1:88984066:88992585 KYAT3,RBMXL1	0	0	-0.0996634	-0.223493
chr19:1269410:1270867 CIRBP	-0.0640718	0	-0.0465512	-0.223484
chr22:32493281:32498144 FBXO7	-0.0235156	0	-0.0373679	-0.223417
chr5:180564578:180564675 CNOT6	-0.0961821	0	-0.112376	-0.22321
chr5:180564593:180564675 CNOT6	0.0961821	0	0.112376	0.22321
chr22:29549158:29553671 THOC5	0	0	0	-0.223185
chr3:191375589:191380159 CCDC50	0	0	-0.0592765	-0.223145
chr6:36102649:36107455 MAPK14	0.130655	0	0.0825377	0.222957
chr14:30559272:30581076 G2E3	0.0789418	0	0.0848871	0.222742
chr5:146130158:146132898 LARS	-0.0534192	0	0	-0.222669
chr9:41011730:41032834 FRG1HP	0.115669	0	0.0956209	0.222611
chr6:167010893:167022409 FGFR1OP,RP11-517H2.6	0	0	0	-0.222595
chr14:89971271:89984516 TDP1	0	0	0	-0.222564
chr16:15599024:15600428 KIAA0430	0.0432442	0	0.0669134	0.222552
chr16:15599117:15600428 KIAA0430	-0.0432442	0	-0.0669134	-0.222552
chr18:76984894:76988877 MBP	0	0	0	-0.222521
chr1:183542364:183544353 SMG7	0.0704688	0	0.0921318	0.222466
chr1:183542502:183544353 SMG7	-0.0704688	0	-0.0921318	-0.222466
chr17:29081000:29082316 MYO18A	-0.087677	0	-0.0783261	-0.222437
chrX:45060764:45061324 KDM6A	0.0814738	0	0.0551743	0.222433
chr20:44257345:44263230 GDAP1L1	0	0	0	-0.222398
chr12:124335632:124336639 NCOR2	0	0	0	-0.222247
chr12:124335632:124336753 NCOR2	0	0	0	0.222247
chr12:8698297:8713811 RIMKLB	0	0	-0.0913574	-0.222235
chr20:9473365:9478921 PLCB4	0	0	0	-0.222164
chr8:52658976:52660926 RB1CC1	0	0	-0.0724355	-0.222105
chr12:122482087:122482635 ZCCHC8	0.0727312	0	0	0.222095
chr5:80408153:80434109 ZFYVE16	0	0	0.0289831	-0.222084
chr12:88035738:88042825 C12orf29	0	0	0	-0.222077
chr1:20749882:20757166 HP1BP3	0.0755655	0	0	0.222048
chr1:20749975:20757166 HP1BP3	-0.0755655	0	0	-0.222048
chr5:171910797:172006458 FBXW11	-0.0803346	0	-0.0642905	-0.222029
chr8:42319421:42319585 IKBKB	0	0	0.0716642	0.222028
chr10:97437750:97441171 EXOSC1	-0.050992	0	0	-0.222015
chr9:125056007:125142633 SCAI	-0.217423	0	-0.221967	0
chr6:70156369:70161900 COL19A1	0	0	0	-0.221917
chr22:30022697:30025630 MTMR3	-0.134428	0	-0.139283	-0.221898
chr16:2498396:2499835 TBC1D24	-0.0471085	0	0	-0.221881
chr1:84670815:84690154 SSX2IP	-0.0471569	0	-0.0382361	-0.22188
chr5:32239173:32243521 MTMR12	-0.0670623	0	-0.0984435	-0.221877
chr10:13441750:13447266 BEND7	0	0	-0.221746	0
chr2:218650526:218651701 ZNF142	0	0	0	0.221719
chr16:57186785:57204504 RSPRY1	-0.191071	0	-0.221699	0
chr2:169563350:169571653 FASTKD1	0	0	0	-0.221698
chr6:93260779:93263860 EPHA7	0	0	0.158093	0.221683
chr3:141902227:141903620 ATP1B3	0.0700215	0	0.0929104	0.221655
chr2:99171429:99171510 MITD1	0	0	0	0.221627
chr7:36415884:36419244 ANLN	-0.0720061	0	-0.0939393	-0.221615
chr19:54449310:54452093 LENG8	0	0	0	-0.221576
chr5:72314158:72320149 MRPS27	0	0	0	0.221552
chr5:87405007:87407976 CCNH	0.0561194	0	0.0746673	0.22154
chr2:38881578:38882413 MORN2	0.157659	0	0	0.221534
chr2:38881578:38889882 MORN2	-0.157659	0	0	-0.221534
chr9:23762249:23765009 ELAVL2	0.107768	0	0.117795	0.221459
chr22:27919545:27922018 TTC28-AS1,TTC28-AS1_1,TTC28-AS1_2	0	0	0	0.221429
chr8:58637389:58642984 NSMAF	-0.0523022	0	0	-0.2214
chr3:143023064:143027149 U2SURP	0	0	0	-0.221371
chr6:37649266:37650109 MDGA1	0.0584012	0	0.047238	0.221366
chr6:37649893:37650109 MDGA1	-0.0584012	0	-0.047238	-0.221366
chr10:35530243:35553019 CCNY	0	0	0	0.221318
chr10:35530510:35553019 CCNY	0	0	0	-0.221318
chr22:50286287:50287111 PLXNB2	0.0342462	0	0.0567456	0.221216
chr5:131427291:131430859 RAPGEF6,CTC-432M15.3	0	0	0	0.221142
chr1:1402256:1402462 MRPL20	0	0	-0.0520009	-0.221117
chr14:24065273:24066398 CARMIL3	0.139031	0	0.156523	0.221092
chr18:50273863:50275129 MBD1	-0.0381282	0	-0.070914	-0.22106
chr2:61236073:61236325 USP34	-0.0448159	0	-0.0609089	-0.220917
chr5:113515362:113532879 YTHDC2	-0.0794169	0	0	-0.220779
chr6:41871637:41891794 USP49,MED20	0	0	0.116538	0.220729
chr9:23765099:23825806 ELAVL2	0.0773984	0	0.117331	0.220613
chr13:99200939:99238427 UBAC2	0	0	0.220599	0
chr6:80128842:80129161 BCKDHB	0	0	0	-0.220461
chr14:49626048:49633287 DNAAF2	0	0	0.15219	0.220457
chr2:206765654:206766644 FASTKD2	0	0	0	-0.22045
chr16:2304150:2308450 ABCA3	0.103272	0	0	0.220415
chr6:41789336:41789531 PRICKLE4,TOMM6	-0.115631	0	0	-0.220365
chr6:41789336:41789568 PRICKLE4,TOMM6	0.115631	0	0	0.220365
chr6:46662498:46664774 SLC25A27	0.0455494	0	0.0649742	0.220309
chr19:17267527:17268756 BABAM1,CTD-2278I10.6	0	0	0	-0.220287
chr19:17267527:17268794 BABAM1,CTD-2278I10.6	0	0	0	0.220287
chr3:11829864:11839222 TAMM41	0	0	0	-0.220235
chr9:65692608:65698515 CBWD5	0	0	0	-0.220198
chr17:47122600:47129393 CDC27	-0.0854677	0	-0.0689915	-0.220159
chr8:10474162:10474455 NA	0	0	0	-0.220148
chr15:41822422:41822593 MAPKBP1	0	0	0	0.220125
chr15:41822422:41822607 MAPKBP1	0	0	0	-0.220125
chr5:38947441:38949712 RICTOR	-0.106473	0	-0.134784	-0.220124
chr13:110644182:110644385 CARS2	0.120497	0	0.123684	0.220112
chr3:40210093:40233859 MYRIP	0.0670504	0	0.0586813	0.220108
chr19:36322030:36330253 LINC00665	0	0	0	0.220098
chr12:32737161:32737865 DNM1L	0.0314017	0	0.040579	0.220014
chrX:45060156:45061324 KDM6A	-0.0557583	0	-0.0458786	-0.219795
chr18:58195733:58245427 NEDD4L	0	0	0.1095	0.219794
chr15:61945882:61946307 VPS13C	0.0496999	0	0.0487054	0.219665
chr20:63945975:63946161 UCKL1	0	0	0	0.219639
chr1:46652628:46658127 ATPAF1	0	0	0	-0.219558
chr5:151447813:151458788 SLC36A1	0.100486	0	0.133604	0.219539
chr8:67137603:67154024 CSPP1	-0.075247	0	-0.07671	-0.219536
chr8:22591668:22593733 PDLIM2,AC037459.4,C8orf58	0	0	0	0.219511
chr12:50412453:50427762 LARP4	-0.136424	0	-0.0869961	-0.219394
chr5:94074769:94111511 FAM172A	0.0611964	0	0.0755659	0.21939
chr17:45996664:46014243 MAPT	0.0967241	0	0.113699	0.219378
chrX:109683666:109733139 ACSL4	-0.118888	0	0	-0.21913
chr3:157150381:157152177 CCNL1	0	0	0	-0.218935
chr11:73878819:73887354 PAAF1	-0.218902	0	0	0
chr19:36551977:36554670 ZNF529	0.116022	0	0.143735	0.218707
chr9:128941571:128949189 PHYHD1,RP11-101E3.5,NUP188	0	0	0	-0.218689
chr8:78675863:78678563 ZC2HC1A	0.0314902	0	0.0452678	0.218685
chr1:204261448:204264942 PLEKHA6	0.118888	0	0.109293	0.218594
chr15:64075537:64088687 FAM96A	0.116132	0	0.133608	0.218577
chr2:209926986:209930968 UNC80	-0.0393064	0	-0.0609714	-0.218527
chr22:31097060:31097269 SMTN	0.187818	0	0	0.218526
chr2:43947370:43948122 LRPPRC	-0.0247861	0	-0.0416832	-0.218374
chr9:87646559:87647305 DAPK1	0	0	0.105738	0.218373
chr1:88786213:88804846 PKN2	-0.0879093	0	0	-0.218332
chr16:2672570:2673283 CTD-2270P14.1	0	0	0	0.218261
chr4:78878891:78910610 BMP2K	-0.125145	0	0	-0.218242
chr6:31835451:31837236 C6orf48	0.136606	0	0.144945	0.218225
chr12:88111858:88115098 CEP290	0	0	-0.0422541	-0.218149
chr7:64882785:64888573 ZNF273	0	0	-0.130826	-0.218117
chr3:142185989:142186194 GK5	0	0	0	0.218083
chr1:110668344:110669770 NA	0	0	0	-0.218009
chr1:237617486:237623765 RYR2	0	0	0	0.217947
chr16:2077726:2079032 TSC2	-0.0734822	0	-0.0243569	-0.217906
chr1:169829449:169830696 C1orf112	-0.0480883	0	-0.0901206	-0.217856
chr3:37947211:37964571 CTDSPL	-0.217794	0	0	0
chr17:81123343:81124727 AATK	0.0432864	0	0.0216887	0.217699
chr3:33408797:33409236 UBP1	0	0	0.0932558	0.217691
chr19:58090386:58098174 ZSCAN18	0	0	0	0.217673
chr5:119203436:119216901 DMXL1	0	0	0	-0.217629
chr3:142186267:142186452 GK5	0	0	0	0.217613
chr1:36461312:36463806 MRPS15	0	0	0	-0.217579
chr14:55650418:55651890 KTN1	-0.12388	0	0	-0.217499
chr6:71293611:71296672 OGFRL1	-0.0492457	0	-0.0494806	-0.217465
chr11:113829345:113833420 USP28	0	0	0	-0.21744
chr19:27730052:27732796 LINC00662	-0.12216	0	0	-0.21735
chr1:92299146:92303977 RPAP2	-0.0248291	0	-0.0299131	-0.217267
chrX:56978421:56978580 SPIN3	0	0	0	-0.217126
chr4:119214222:119217550 USP53	0	0	0.0851026	0.217024
chr5:150731489:150733368 DCTN4	0	0	0	0.217013
chr6:127314896:127327002 ECHDC1	0	0	0	-0.216992
chrX:11760937:11761500 MSL3	0.0485873	0	0.0590943	0.21691
chr9:4622510:4625217 SPATA6L	0	0	0	-0.216884
chr9:4622510:4625327 SPATA6L	0	0	0	0.216884
chr5:75705787:75712854 POC5	-0.20149	0	-0.216816	0
chr12:57784170:57786163 RP11-571M6.15,TSFM	0	0	-0.00209647	-0.216795
chr2:210028969:210040420 KANSL1L	-0.0200171	0	-0.0527782	-0.216784
chr4:75521861:75526960 THAP6	0	0	-0.0764809	-0.216759
chr4:113311399:113317707 ANK2	-0.0601881	0	-0.0741709	-0.216731
chr10:69930552:69936756 COL13A1	0.0025232	0	0	-0.216602
chr12:77968702:77998337 NAV3	0	0	-0.216568	0
chr1:160224549:160225062 DCAF8,RP11-574F21.3	0.0657155	0	0	0.216301
chr2:208345194:208346050 PIKFYVE	0.0195878	0	0.0757587	0.216299
chr2:25235825:25239130 DNMT3A	-0.0439359	0	-0.0644475	-0.216292
chr19:40198555:40205121 MAP3K10	0	0	0	-0.216272
chr3:52617538:52624897 PBRM1	0	0	0	0.216204
chr3:121809009:121826051 IQCB1	0.0518383	0	0.0402692	0.216171
chr17:64506262:64506755 DDX5	0	0	0	0.216085
chrX:70495453:70498520 DLG3	0	0	0	-0.216062
chr12:112125618:112130511 TRAFD1	0	0	0.21606	0
chr12:112126149:112130511 TRAFD1	0	0	-0.21606	0
chr9:27556796:27561585 C9orf72	0	0	-0.0269252	-0.216001
chr17:58305643:58305833 TSPOAP1	0	0	0.0461367	0.215986
chr20:62860308:62860830 TCFL5	0	0	-0.21595	0
chr20:62860308:62861024 TCFL5	0	0	0.21595	0
chr18:46815349:46820933 PIAS2	-0.120651	0	-0.158664	-0.215878
chr3:141580451:141586025 RASA2	-0.0359583	0	-0.0612567	-0.215864
chr10:97468406:97469646 MMS19	0	0	0	-0.215859
chr9:128941571:128941668 PHYHD1,RP11-101E3.5,NUP188	0	0	0	0.215834
chr13:95606059:95611445 DZIP1	0	0	0	-0.215804
chr3:125480319:125497341 SNX4	-0.0535501	0	0	-0.215715
chr3:53718388:53719755 CACNA1D	-0.0671883	0	-0.0967813	-0.215689
chr4:113537443:113548657 CAMK2D	0.0796686	0	0.0909233	0.215663
chr11:65344069:65345666 DPF2	0	0	0	-0.215611
chr7:137678652:137846462 DGKI	-0.0778684	0	-0.106373	-0.215596
chr7:100223698:100223882 GATS	-0.0820461	0	-0.0313506	-0.215569
chr10:27060540:27063988 ANKRD26	0	0	0	-0.215516
chr2:151468756:151469054 RIF1	0.0971921	0	0.116256	0.215336
chr12:43802464:43804495 TWF1	-0.130613	0	0	-0.215291
chr7:151240522:151241164 SMARCD3	-0.0493395	0	-0.0486794	-0.21529
chr15:99566104:99598430 MEF2A	0.0528948	0	0.0500153	0.215288
chr11:14498985:14499742 COPB1,RP11-140L24.4	0.105688	0	0.133024	0.215149
chr10:130175089:130179342 GLRX3	0.104384	0	0.0913992	0.215114
chr1:220011056:220018449 EPRS	0	0	-0.105096	-0.215093
chrX:57287017:57292498 FAAH2	0	0	-0.114982	-0.215087
chr14:71702505:71705222 SIPA1L1	0	0	0	-0.215081
chr12:123707073:123718623 TCTN2,ATP6V0A2	0	0	0	-0.215063
chr1:160083235:160083917 KCNJ9	-0.122028	0	-0.114205	-0.215008
chr15:67202898:67203548 AAGAB	-0.0058292	0	0.0299507	0.214999
chr3:42619708:42621429 NKTR	-0.14431	0	0	-0.214995
chr6:47603832:47606165 CD2AP	0	0	0	0.21495
chr19:49697465:49704710 CPT1C	-0.00571702	0	-0.0150719	-0.214822
chr9:34616113:34617885 DCTN3	0	0	0	0.214817
chr2:178306286:178328256 OSBPL6	0	0	0	-0.214784
chr15:50999262:51001026 AP4E1	0	0	0	0.214685
chr8:131905330:131909167 EFR3A	-0.0233804	0	-0.0290934	-0.214549
chr14:23306947:23307192 BCL2L2,BCL2L2-PABPN1	-0.0411153	0	-0.0617422	-0.214446
chr14:61744813:61746934 HIF1A	-0.052038	0	-0.0704867	-0.214443
chr16:2076585:2079032 TSC2	0.0996365	0	0.0935888	0.214399
chr12:100315734:100317803 SCYL2	0	0	-0.0744287	-0.214397
chr9:113206578:113207212 FKBP15	0.0804701	0	0	0.214356
chr7:87181341:87182056 DMTF1	0	0	0.10055	0.214354
chr18:42029441:42037692 PIK3C3	-0.0346234	0	-0.0563591	-0.214198
chr13:31143923:31145563 HSPH1	0.0344452	0	0.0783039	0.21419
chr15:50592626:50592783 TRPM7	0	0	-0.0460383	-0.21415
chr8:28106783:28110370 ELP3	-0.0631114	0	-0.0716649	-0.214125
chr2:74458671:74459643 WBP1,INO80B-WBP1	0	0	-0.214036	0
chr10:94562727:94562812 HELLS	0	0	0.214006	0
chr1:114397990:114399457 TRIM33	0.106897	0	0.0963768	0.213995
chr2:97841937:97859304 TMEM131	-0.077298	0	-0.0785792	-0.213971
chr20:13788652:13798461 NDUFAF5	-0.0458207	0	-0.0461706	-0.213857
chr15:49156016:49201162 GALK2	0	0	0	-0.213847
chr14:23347731:23348161 SLC22A17,AL049829.1	-0.044069	0	-0.0526623	-0.213765
chr15:101430063:101431320 PCSK6	0	0	0.0336047	0.213717
chr18:57571540:57573246 FECH	0	0	0.213686	0
chr18:57571603:57573246 FECH	0	0	-0.213686	0
chr15:64409828:64418541 TRIP4	0	0	0	-0.213566
chr1:30966197:30967167 PUM1	0.122519	0	0.125304	0.213463
chr1:30966278:30967167 PUM1	-0.122519	0	-0.125304	-0.213463
chr12:56348851:56349345 STAT2	0	0	0	-0.213421
chr15:78971934:78973303 RASGRF1	0	0	0	0.213395
chr6:83113421:83118888 DOPEY1	0	0	0	0.213131
chr12:67649182:67649797 DYRK2	0	0	0	0.213034
chr3:56773816:56801703 ARHGEF3	0	0	0	-0.213028
chr20:34860321:34861445 GGT7	0	0	0	0.212974
chr4:83446086:83448783 HELQ	-0.119698	0	-0.0914838	-0.212887
chr1:154268954:154269362 UBAP2L	-0.0682979	0	-0.0593948	-0.212731
chr15:61882736:61890165 VPS13C	-0.067824	0	-0.0814108	-0.212665
chr5:111735507:111757136 NREP	0	0	0	-0.21264
chr2:70227822:70229264 TIA1	-0.185132	0	-0.130461	-0.212616
chr15:25080079:25081091 SNHG14	0.0528807	0	0.0975425	0.212592
chr19:12866102:12866653 MAST1	0.0315639	0	0.0404561	0.212517
chr19:12866165:12866653 MAST1	-0.0315639	0	-0.0404561	-0.212517
chr15:40416362:40418130 IVD	0.0512577	0	0.0842322	0.212505
chr2:63912661:63914182 VPS54	-0.0210081	0	-0.0263175	-0.212471
chr19:1446341:1452984 APC2	0	0	0	-0.212447
chr16:3533155:3536122 CLUAP1	0	0	0.100529	0.212439
chr14:56618763:56625382 TMEM260	0	0	0	-0.212427
chr17:3818572:3821111 NCBP3	0	0	0	-0.212286
chr17:3818572:3821249 NCBP3	0	0	0	0.212286
chr3:49115938:49116047 USP19	0	0	-0.146626	-0.212208
chr3:49115944:49116047 USP19	0	0	0.146626	0.212208
chr14:24064346:24064958 CARMIL3	0	0	0.212177	0
chr7:92242137:92244902 KRIT1	0	0	0	-0.212103
chr12:56349261:56349426 STAT2	0	0	0	0.212085
chr13:114236896:114239350 CDC16	-0.0426669	0	-0.113451	-0.21207
chr3:33574496:33576169 CLASP2	0.0631924	0	0.0813419	0.21203
chr2:202892702:202896065 WDR12	0	0	0	-0.211891
chr5:147639760:147641708 JAKMIP2	-0.0330886	0	-0.0459121	-0.211867
chr8:22067682:22069419 DMTN	0	0	0	-0.211798
chr9:135030:154709 CBWD1	-0.0621126	0	0	-0.21166
chr12:49043998:49044191 KMT2D	0	0	-0.1186	-0.211636
chr12:49043998:49044200 KMT2D	0	0	0.1186	0.211636
chr10:119751156:119781061 INPP5F	-0.0331031	0	-0.0731312	-0.211626
chr4:25413742:25414466 ANAPC4	-0.0654331	0	0	-0.21162
chr4:26584292:26613169 TBC1D19	0	0	0	0.21157
chr20:62154465:62158672 SS18L1	-0.053216	0	-0.0933136	-0.211567
chr18:55229076:55232509 TCF4	-0.107377	0	-0.0923118	-0.21156
chr18:55229076:55232521 TCF4	0.107377	0	0.0923118	0.21156
chr12:43797833:43799398 TWF1	0	0	0	-0.211515
chr7:151052237:151052574 ASIC3	0.211471	0	0	0
chr11:74937068:74945018 XRRA1	0	0	0	-0.211401
chr4:51843267:51863437 DCUN1D4	0	0	0.10155	0.211323
chr18:12785844:12794384 PTPN2	0	0	0	-0.21124
chr7:74714916:74716894 GTF2I	0	0	0.0796857	0.21124
chr9:97328146:97330154 RP11-23J9.4,CCDC180	0.0470681	0	0.0239306	0.211047
chrX:40664489:40671861 MED14	-0.0585516	0	-0.0525548	-0.211028
chr19:44172952:44175498 ZNF226	0	0	-0.100197	-0.210957
chr10:68516843:68527246 SLC25A16	0	0	0	0.210931
chr17:32365487:32367772 ZNF207	-0.0140281	0	-0.0429202	-0.210918
chr2:73058596:73070460 SFXN5	0	0	0	-0.210905
chr13:39026387:39029281 PROSER1	-0.00509233	0	0	-0.210657
chr1:7786836:7788045 PER3	0.0468842	0	0.0574867	0.210635
chr2:48530216:48580587 STON1,STON1-GTF2A1L	0.0285268	0	0.0490427	0.210467
chr3:33576275:33577202 CLASP2	0.0817152	0	0.0695094	0.210451
chr7:99917885:99919009 TRIM4	0.0716698	0	0.0762585	0.21038
chr3:121826180:121828470 IQCB1	0.0822831	0	0.0707619	0.210364
chr11:59773294:59790519 STX3	-0.047697	0	-0.0546879	-0.210355
chr10:101829199:101839753 KCNIP2	0.21029	0	0.183221	0
chrX:123859905:123888619 XIAP	-0.0700184	0	-0.0547594	-0.210224
chr22:19976723:19977415 ARVCF	0.0454609	0	0.0461133	0.210217
chr10:12149961:12156907 SEC61A2	0	0	0	-0.21021
chrX:103685260:103686631 MORF4L2	0	0	0	-0.210177
chrX:103685260:103687989 MORF4L2	0	0	0	0.210177
chr5:95814389:95816507 GLRX	0.039606	0	0.113203	0.210121
chr6:30292599:30294471 HCG18	0.122631	0	0.0489937	0.210108
chr3:197613318:197615564 AC024560.3	0	0	0	0.210099
chr14:73099750:73103192 RBM25	0	0	0	-0.210096
chr6:56463764:56464685 DST	0.0493907	0	0.0768423	0.209929
chr13:99201567:99238427 UBAC2	0	0	-0.20991	0
chr14:77306441:77320434 POMT2	-0.0544465	0	-0.0954195	-0.209837
chr20:5951023:5952011 MCM8	0	0	0	0.209808
chr20:5951077:5952011 MCM8	0	0	0	-0.209808
chr14:100137802:100141180 EVL	0.0808865	0	0.0952324	0.209656
chrX:56977196:56978580 SPIN3	0	0	0	0.209638
chr6:41067437:41070076 OARD1	-0.0237836	0	-0.0296452	-0.209598
chr16:58167795:58174451 CSNK2A2	-0.0259034	0	-0.0329561	-0.209474
chr3:70988077:71015549 FOXP1	0	0	-0.0430777	-0.209318
chr1:25244498:25245150 RSRP1	0.146236	0	0.123517	0.209302
chr5:96740118:96741266 CAST	-0.209228	0	0	0
chr7:87152555:87154390 DMTF1	0	0	-0.0725086	-0.209179
chr11:57794081:57795577 CTNND1,RP11-691N7.6	0.101809	0	0.0429117	0.209132
chr9:114284777:114288455 COL27A1	0	0	0	0.209131
chr14:22830254:22834172 MRPL52	-0.0200032	0	-0.0658942	-0.209117
chr3:113401287:113403852 CFAP44,AC026348.1	0	0	-0.0682956	-0.209105
chr6:25652485:25661552 SCGN	0	0	0	-0.209046
chr14:96292098:96294960 ATG2B	0.0311914	0	0.0334181	0.209038
chr7:112287074:112296229 ZNF277	-0.0757662	0	-0.0764093	-0.209003
chr6:143462997:143468122 PEX3	0.0580524	0	0.0397262	0.208885
chr10:69495689:69498209 TSPAN15	-0.0422268	0	-0.0623798	-0.208846
chr14:34524807:34533444 EAPP	-0.0867756	0	-0.0522924	-0.208842
chr1:84501970:84506011 GNG5,CTBS	-0.108069	0	-0.117379	-0.20876
chr2:9388546:9393482 ASAP2	0	0	0	-0.208696
chr8:30104486:30105746 LEPROTL1	0	0	0	0.208677
chr8:115620060:115668545 TRPS1	0	0	0	-0.208628
chr8:84183578:84529299 RALYL	-0.111326	0	-0.0921828	-0.208624
chr4:102657900:102664685 MANBA	0	0	-0.208619	0
chr5:95516750:95516916 TTC37	0.111802	0	0	0.208612
chr11:47565986:47571471 PTPMT1,NDUFS3	0	0	0	-0.208608
chr2:127293718:127293857 ERCC3	-0.082975	0	-0.0627582	-0.208602
chr2:127293718:127294054 ERCC3	0.082975	0	0.0627582	0.208602
chr16:2183941:2184777 CASKIN1	0	0	0	0.208584
chr3:113585270:113601588 SIDT1	-0.0539258	0	-0.0678842	-0.208576
chr2:1917339:1922286 MYT1L	-0.0859761	0	-0.0963502	-0.208569
chr21:20778547:20781349 LINC00320	0	0	-0.208426	0
chr1:186391791:186406083 C1orf27	-0.0320667	0	-0.0310267	-0.208404
chr10:5903175:5906037 FBXO18	-0.139313	0	-0.0944238	-0.20836
chr3:195960086:195963300 SDHAP1	0.0589102	0	0.0999939	0.208339
chr20:3796731:3797622 CDC25B	0	0	0	0.208312
chr1:244686669:244691879 DESI2	0	0	0	-0.208312
chr4:168925078:168926213 PALLD	0	0	0	-0.208289
chr13:37024442:37026204 SUPT20H	0	0	0	-0.208274
chr1:160081697:160083917 KCNJ9	0.124656	0	0.121578	0.208226
chr6:52984605:52994157 GSTA4	-0.0283308	0	-0.0170651	-0.208207
chr5:124637906:124639133 ZNF608	-0.208085	0	-0.203546	0
chr17:32045818:32047761 LRRC37B	0.0769865	0	0	0.207938
chr1:16930594:16931291 CROCC	0.101705	0	0	0.207926
chr12:105107861:105111125 KIAA1033	0.0481924	0	0.0719853	0.207734
chr1:231561255:231564528 TSNAX,TSNAX-DISC1	0.0926397	0	0.0966843	0.207652
chr9:13121932:13122087 MPDZ	0.060712	0	0.0542678	0.20764
chr22:40360492:40361088 ADSL	-0.0827603	0	0	-0.207604
chr22:40360492:40361273 ADSL	0.0827603	0	0	0.207604
chr5:115269000:115271213 CCDC112	0	0	0	-0.207535
chr19:39391638:39393553 MED29	-0.044996	0	0	-0.207529
chr4:128061401:128074460 LARP1B	0.171472	0	0.207502	0
chr4:128062219:128074460 LARP1B	-0.171472	0	-0.207502	0
chr19:5215595:5218420 PTPRS	-0.0823086	0	-0.0721563	-0.207343
chr12:99214:138267 IQSEC3	0	0	0	-0.20731
chr3:10142187:10146514 VHL	0.0627988	0	0	0.207308
chr2:101282057:101286081 RNF149	0.0350825	0	0.0547603	0.207294
chr7:7673453:7801670 UMAD1,RP11-505D17.1	0	0	0	0.207244
chr7:7788864:7801670 UMAD1,RP11-505D17.1	0	0	0	-0.207244
chr5:36253789:36257454 RANBP3L	0	0	-0.0479158	-0.207217
chr4:112637239:112644668 LARP7	0	0	-0.0910691	-0.20719
chr7:2543962:2547324 BRAT1	-0.0471963	0	-0.0450561	-0.207185
chr5:90637948:90642636 ADGRV1	-0.120776	0	0	-0.20717
chr12:122940284:122940807 ABCB9	0.0629218	0	0.0336632	0.207121
chr19:53122743:53132856 ZNF415	0	0	0.0627226	0.206988
chr14:75902224:75906555 TTLL5,IFT43	-0.0321188	0	-0.0224158	-0.206968
chr2:96265489:96265869 TMEM127	-0.200417	0	-0.206799	0
chr2:96265512:96265869 TMEM127	0.200417	0	0.206799	0
chr18:51076776:51078256 SMAD4	0	0	0	-0.20676
chr10:119920984:119926036 SEC23IP	0	0	0	0.206729
chr1:147166939:147171989 PRKAB2	0	0	0	-0.20666
chr19:55485780:55486408 NAT14	0	0	0.20653	0
chr19:55485780:55487054 NAT14	0	0	-0.20653	0
chr9:83753359:83780382 GKAP1	0	0	0	-0.206491
chr17:37149974:37155683 ACACA	-0.0484668	0	-0.0712533	-0.206453
chr7:44219522:44220060 CAMK2B	-0.206443	0	-0.137834	-0.199941
chr4:48548793:48550592 FRYL	0	0	0	-0.206329
chr7:66921461:66941848 TMEM248	0.078198	0	0.107099	0.206324
chr7:66922246:66941848 TMEM248	-0.078198	0	-0.107099	-0.206324
chr19:57922629:57923192 ZNF418	0	0	0	0.206297
chr14:59359504:59363651 DAAM1	0	0	0	-0.206117
chr5:177713916:177714054 FAM153A	0.126182	0	0.1892	0.206101
chr7:135363186:135363854 CNOT4	-0.111785	0	-0.108791	-0.206085
chr6:111780635:111872968 FYN	-0.0374625	0	-0.0449003	-0.206077
chr12:6548825:6549756 IFFO1	0	0	0	0.206068
chr8:42338685:42339012 POLB	0	0	0	0.206057
chr1:70230618:70231095 SRSF11	0.122916	0	0.0867626	0.206055
chr19:44055191:44060749 AC084219.2,ZNF223	0	0	0	-0.206032
chr11:95779135:95779607 FAM76B	0	0	0	0.206029
chr6:127267095:127280231 RNF146	0	0	0	-0.205914
chr12:109477764:109481637 UBE3B	0	0	0	0.205849
chr12:109478109:109481637 UBE3B	0	0	0	-0.205849
chr5:98869277:98869754 CHD1	-0.122236	0	-0.115484	-0.205834
chr14:23566686:23567111 AP1G2	0	0	0.0758334	0.205698
chr18:63407499:63410290 VPS4B	0.0215456	0	0.057158	0.205696
chr1:243128300:243129360 CEP170	0.0236576	0	0.0658963	0.205671
chr6:127266925:127280231 RNF146	0	0	0	0.205622
chrX:75274640:75299735 UPRT	0	0	-0.0680633	-0.20557
chr15:99703385:99706729 MEF2A	0	0	0	0.205545
chr6:127998904:128005084 PTPRK	0	0	-0.205544	0
chr22:50456673:50459255 SBF1	0	0	0	-0.20551
chr7:2543962:2544909 BRAT1	0.0574478	0	0.0467173	0.205423
chr6:24412395:24415016 MRS2	0	0	0	-0.205413
chr6:24412395:24415033 MRS2	0	0	0	0.205413
chr17:75032724:75034033 KCTD2	0	0	0	-0.205404
chrX:19684028:19695612 SH3KBP1	0	0	0	-0.205375
chr13:48081731:48086282 MED4	-0.0778348	0	0	-0.205362
chr6:10910200:10912673 RP11-637O19.3,SYCP2L	0	0	0.205324	0
chr1:86354859:86356444 ODF2L	0.10663	0	0.102384	0.205155
chr22:26477136:26479265 HPS4	-0.10914	0	-0.0697987	-0.205128
chr11:12864900:12879708 TEAD1	0	0	0	0.205091
chr12:122920353:122932192 ABCB9	-0.191927	0	-0.205015	0
chr14:35110629:35121902 PPP2R3C	0	0	0	-0.20498
chr1:144448916:144450772 NBPF15	0.0769775	0	0.120423	0.204964
chr14:63993969:63996947 SYNE2	0	0	0	-0.204823
chr2:39035500:39051144 SOS1	0.0680358	0	0.0969478	0.20477
chr1:155729122:155729208 DAP3	0.0214836	0	0.0169475	0.204767
chr1:246193963:246327201 SMYD3	-0.0431337	0	-0.0378483	-0.204743
chr15:25078995:25079826 SNHG14	0.0662971	0	0.0535277	0.204737
chr10:68516843:68517084 SLC25A16	0	0	0	-0.204673
chr17:38498510:38500597 ARHGAP23	-0.0417237	0	-0.0640396	-0.204667
chr7:64882785:64893412 ZNF273	0	0	0.134006	0.204589
chr1:39459832:39460632 MACF1	0.1076	0	0.118302	0.204489
chr1:86356602:86358787 ODF2L	0.0100318	0	0.0774155	0.204475
chr14:94208566:94230587 PPP4R4	0.20442	0	0.197054	0
chr17:37284970:37330173 ACACA	-0.105157	0	-0.116869	-0.204386
chr13:51382123:51383329 INTS6	0.0351612	0	0.0482341	0.204305
chr13:110624279:110627439 NAXD	-0.0735686	0	0	-0.204293
chr13:75292271:75299330 TBC1D4	-0.0311492	0	-0.062966	-0.204275
chr20:2965202:2986765 PTPRA	0.122592	0	0.0933343	0.204252
chr1:144960398:144995008 SRGAP2B	0	0	0	0.20422
chr6:44135096:44136349 TMEM63B	0	0	0	-0.204203
chr1:28560732:28561346 TRNAU1AP	0.146936	0	0.10931	0.204112
chr1:234406099:234410445 TARBP1	0	0	-0.203957	0
chr1:234409573:234410445 TARBP1	0	0	0.203957	0
chr19:11033517:11034123 SMARCA4	0	0	0	-0.203919
chr1:186417654:186435225 C1orf27	0	0	0	-0.203913
chr17:29074914:29082316 MYO18A	0.0747862	0	0.074352	0.203903
chr17:19909978:19920036 AKAP10	0.0776758	0	0.109985	0.203901
chr3:52696040:52696542 GLT8D1	-0.0583585	0	-0.0685053	-0.203898
chr11:43889828:43892041 ALKBH3	0.119796	0	0	0.203892
chr3:15430007:15434348 EAF1	0	0	0	-0.203855
chr19:36556197:36572333 ZNF529	0	0	0.0682323	0.203805
chr3:38252392:38252817 OXSR1	0	0	0	0.203784
chr17:58305865:58306342 TSPOAP1	0	0	0.0373683	0.203702
chr6:41067437:41068841 OARD1	0.0911853	0	0.0236698	0.203608
chr18:2656261:2666157 SMCHD1	0.0720487	0	0.0774429	0.203572
chr14:23299541:23300758 PPP1R3E	-0.150237	0	-0.203488	0
chr1:150441023:150443231 RPRD2	-0.113809	0	0	-0.203463
chr8:106737600:106739458 OXR1	0	0	0	0.203436
chr9:112694233:112717987 INIP	0	0	0	-0.203432
chr5:177459268:177460432 DBN1	0	0	0	-0.203418
chr17:76744466:76744575 MFSD11	-0.10762	0	-0.110787	-0.203321
chr17:76744466:76754047 MFSD11	0.10762	0	0.110787	0.203321
chr16:56498568:56499778 BBS2	0	0	0	0.203272
chr2:63981887:63983864 VPS54	-0.119398	0	-0.110574	-0.203201
chr6:112081207:112084189 TUBE1	0.064282	0	0	0.203198
chrX:85265255:85268294 ZNF711	0	0	0	-0.20313
chr12:101726404:101728901 CHPT1	0	0	0	0.203123
chr14:66965325:66985682 GPHN	0.0373275	0	0.0641457	0.203101
chr2:206279592:206280550 ZDBF2	0.145677	0	0.107541	0.203086
chr5:88270585:88282042 TMEM161B-AS1	0	0	0	0.203052
chr6:83159960:83162790 DOPEY1	0.0713752	0	0	0.203007
chr13:52659249:52662649 SUGT1	0.109433	0	0.125009	0.202979
chr2:226839627:226864604 RP11-395N3.2,RHBDD1	-0.128046	0	0	-0.202892
chr7:75425708:75437515 POM121C	0	0	0	-0.202885
chr1:155853806:155857159 GON4L	0	0	0	0.202835
chr5:112864528:112864621 CTC-554D6.1,CTC-487M23.8,SRP19	0.00749809	0	0.0424898	0.202781
chr4:893489:893874 GAK	0	0	0	0.202628
chr4:893587:893874 GAK	0	0	0	-0.202628
chr12:113372807:113374793 PLBD2	0	0	0	-0.202598
chr10:97751462:97753038 ZFYVE27	-0.139563	0	-0.202574	0
chr7:100345968:100349717 STAG3L5P,STAG3L5P-PVRIG2P-PILRB	-0.0264394	0	-0.118265	-0.202574
chr18:46818447:46820933 PIAS2	0.127266	0	0.147722	0.202526
chr9:121090405:121094888 CNTRL	0.0816063	0	0.0911711	0.202461
chr19:3452666:3462752 NFIC	0	0	-0.0257836	-0.202418
chr11:83633325:83682158 DLG2	0	0	0	-0.202397
chr11:83633325:83786690 DLG2	0	0	0	0.202397
chr3:58132019:58132808 FLNB	0.0657714	0	0	0.202366
chr17:68101959:68114422 LINC00674	0.0923743	0	0.121788	0.202341
chr5:149509953:149513070 CSNK1A1	-0.0431263	0	-0.0373057	-0.202321
chr5:103104846:103106716 GIN1	0.0591433	0	0.0350893	0.202314
chr3:121781874:121788284 IQCB1	0	0	0	0.202273
chr9:97685040:97687096 XPA	0.0425001	0	0.0526849	0.202243
chr4:20713539:20727285 PACRGL	-0.106034	0	-0.120369	-0.202188
chr16:30654339:30655351 PRR14	-0.0642985	0	-0.0421404	-0.202179
chr15:50999262:51000168 AP4E1	0	0	0	-0.202139
chr1:43920928:43921443 ST3GAL3	0	0	0	-0.202138
chr1:45332834:45334391 MUTYH	0	0	-0.0281896	-0.202089
chr17:12952581:12955749 ARHGAP44	0	0	-0.0420611	-0.201991
chr17:12952581:12955867 ARHGAP44	0	0	0.0420611	0.201991
chr7:66554837:66573385 GS1-124K5.12	0	0	0	-0.20198
chr11:31801776:31802704 PAX6	-0.0457188	0	-0.101621	-0.201889
chr22:21968775:21971877 TOP3B	0	0	0	-0.201833
chr11:95790743:95799232 CEP57	0.0414389	0	0.0513772	0.201774
chr6:33438919:33440553 SYNGAP1	-0.0610729	0	-0.068316	-0.201753
chr6:33438919:33440729 SYNGAP1	0.0610729	0	0.068316	0.201753
chr10:42523738:42525540 ZNF37BP	-0.126094	0	0	-0.201701
[truncated: 6,664 more rows]

## Sheet: SuppTable3
junction	Gene	correlation with insolubility
chr16:56498568:56499778	BBS2	-0.830339
chr5:162149313:162153093	GABRG2	0.819207
chr5:162151753:162153093	GABRG2	-0.812165
chr7:128817864:128821799	CCDC136	-0.808665
chr18:23466276:23473429	RIOK3	0.804236
chr5:98868635:98869754	CHD1	-0.796755
chr5:162149313:162151730	GABRG2	-0.793948
chr15:56658486:56666395	ZNF280D	0.793708
chr15:76947517:76948338	RCN2	0.790833
chr15:76947517:76948410	RCN2	-0.790833
chr3:127576893:127579740	TPRA1	0.790021
chr12:88053746:88054340	CEP290	-0.789813
chr1:36293935:36296583	THRAP3	-0.786651
chrX:53083305:53084532	TSPYL2	0.78664
chrX:53083305:53084545	TSPYL2	-0.78664
chr22:40267036:40273425	TNRC6B	0.785517
chr7:6026961:6028918	EIF2AK1	0.785052
chr12:21515270:21515669	GOLT1B	-0.780152
chr17:17215316:17217069	RP11-45M22.4,FLCN	0.777704
chr10:60076454:60080537	ANK3	0.777333
chr8:102836390:102838744	AZIN1	-0.775374
chr8:102836541:102838744	AZIN1	0.775374
chr22:21568377:21592861	UBE2L3	0.774526
chr4:139072003:139073454	ELF2	-0.773741
chr4:139072039:139073454	ELF2	0.773741
chr17:47154864:47156913	CDC27	0.772893
chr15:56642997:56654198	ZNF280D	-0.772683
chr20:58343799:58353432	RAB22A	0.771904
chr12:111513539:111518249	ATXN2	0.771617
chr15:56654234:56654385	ZNF280D	-0.77126
chr12:130872126:130872836	RAN	0.770954
chr1:9735615:9735885	CLSTN1	-0.769953
chr6:143462997:143470961	PEX3	0.769734
chr6:53076543:53080968	FBXO9	0.769368
chr5:179614959:179616126	HNRNPH1	0.768893
chr14:23347731:23348161	SLC22A17,AL049829.1	0.767657
chr8:61644001:61644600	ASPH,AC090094.1	-0.76751
chr4:145110444:145112239	ABCE1	0.767307
chr6:145945637:145946233	SHPRH	-0.767256
chr3:20122804:20125905	KAT2B	-0.766719
chr3:20122973:20125905	KAT2B	0.766719
chr7:11062085:11102486	PHF14	-0.764269
chr10:91953873:91957225	BTAF1	0.764222
chr15:41475819:41476181	RTF1	0.763361
chr15:41475819:41476446	RTF1	-0.763361
chr9:36204179:36209267	CLTA	-0.762789
chr1:215577728:215579000	KCTD3	0.76226
chr12:112247076:112248067	HECTD4	0.762214
chr16:89873859:89883351	TCF25	-0.762196
chr1:39459832:39460632	MACF1	-0.762004
chr12:21512376:21515669	GOLT1B	0.761929
chr3:179375341:179377344	MFN1	0.761765
chr6:17834071:17836878	KIF13A	-0.760895
chr6:17834168:17836878	KIF13A	0.760895
chr11:11842224:11884467	USP47	0.760238
chr7:128805901:128817758	CCDC136	-0.760238
chr12:96297721:96300304	CDK17	0.76021
chr2:177212805:177215539	HNRNPA3	-0.75981
chr2:177212871:177215539	HNRNPA3	0.75981
chr18:55229076:55232509	TCF4	0.759633
chr18:55229076:55232521	TCF4	-0.759633
chr2:206279592:206280550	ZDBF2	-0.759601
chr12:32722633:32730988	DNM1L	0.759405
chr12:69370975:69390147	YEATS4	-0.758644
chr12:69370975:69407160	YEATS4	0.758644
chr7:128809644:128810139	CCDC136	0.757176
chr17:76744466:76744575	MFSD11	0.756986
chr17:76744466:76754047	MFSD11	-0.756986
chr7:143854142:143857074	TCAF1	0.756646
chr7:143854142:143857100	TCAF1	-0.756646
chr13:40749281:40754019	MRPS31	-0.756208
chr5:98868635:98869014	CHD1	0.756034
chr12:69362907:69365633	YEATS4	-0.755984
chr18:2656261:2666870	SMCHD1	0.755237
chr16:58560362:58574609	CNOT1	-0.754868
chr16:56498693:56499778	BBS2	0.754459
chr1:39459249:39460632	MACF1	0.75435
chr11:85974812:85981129	PICALM	0.754318
chr9:85976735:85977363	NAA35	-0.754223
chr13:31946181:31952495	EEF1DP3,FRY	0.753927
chr15:65155856:65157746	CLPX	0.753745
chr16:21810838:21811778	RRN3P1	-0.75347
chr8:124508688:124515887	TATDN1	0.75299
chr2:219228485:219229535	ATG9A	-0.752329
chr7:11062085:11111350	PHF14	0.75199
chr12:32722633:32731014	DNM1L	-0.751052
chr14:69767251:69768138	SRSF5	-0.748858
chr7:17834184:17839807	SNX13	0.748786
chr5:128184501:128184723	SLC12A2	0.748299
chr5:128184501:128184789	SLC12A2	-0.748299
chr4:113318620:113330246	ANK2	0.747972
chr8:61643433:61644600	ASPH,AC090094.1	0.747768
chr2:73844888:73845167	STAMBP	-0.747761
chr2:73845036:73845167	STAMBP	0.747761
chr1:58685251:58690340	MYSM1	0.747257
chr3:161221724:161221994	NMD3	0.747123
chr1:227048010:227069777	CDC42BPA	0.747104
chr20:35729365:35731941	RBM39	0.746562
chr13:110624279:110625190	NAXD	-0.746224
chr2:151458910:151461138	RIF1	0.745586

## Sheet: SuppTable4
	Leafcutter:delta_psi	Leafcutter:delta_psi	Leafcutter:delta_psi	Leafcutter:delta_psi
Junction	ALShigh_vs_Control	ALSlow_vs_Control	C9_vs_Control	FTD_vs_Control
chr12:54282874:54283079 HNRNPA1	-0.0446483	0	-0.045139	-0.140054
chr12:54282874:54283812 HNRNPA1	0.0641283	0	0.0674213	0.182886
chr12:54283234:54283812 HNRNPA1	-0.01948	0	-0.0222823	-0.0428317
chr12:54284317:54284549 HNRNPA1	0	0	0	0.0683341
chr12:54284317:54286662 HNRNPA1	0	0	0	-0.0683341
chr10:68332197:68337199 HNRNPH3	0	0	0	0.000903326
chr10:68332216:68337199 HNRNPH3	0	0	0	0.108741
chr10:68332235:68337199 HNRNPH3	0	0	0	-0.104558
chr10:68333102:68337199 HNRNPH3	0	0	0	-0.00508603
chr10:68338642:68339140 HNRNPH3	0.069936	0	0.0749795	0.111634
chr10:68338669:68339140 HNRNPH3	-0.000592127	0	0.00275008	-0.000942758
chr10:68338687:68339140 HNRNPH3	-0.0693438	0	-0.0777296	-0.110691
chr10:68341680:68341759 HNRNPH3	0	0	0	0.00900752
chr10:68341680:68341783 HNRNPH3	0	0	0	-0.00900752
chr14:21234229:21262594 HNRNPC	0	0	0.00100441	0.00196656
chr14:21234229:21262601 HNRNPC	0	0	0.0068303	0.0155817
chr14:21234229:21263311 HNRNPC	0	0	-0.0156292	-0.00992176
chr14:21234229:21269298 HNRNPC	0	0	0.0198314	0.0371668
chr14:21263336:21269298 HNRNPC	0	0	-0.0291952	-0.0504508
chr14:21263829:21269298 HNRNPC	0	0	0.0215427	0.0196183
chr14:21268668:21269298 HNRNPC	0	0	-0.00272841	-0.0085053
chr19:8471427:8473664 HNRNPM	0	0	0	0.0247285
chr19:8471427:8474167 HNRNPM	0	0	0	-0.0583353
chr19:8473708:8474167 HNRNPM	0	0	0	0.0336068
chr19:8474244:8483158 HNRNPM	0	0	0	0.0505067
chr19:8474244:8485603 HNRNPM	0	0	0	-0.0867551
chr19:8483211:8485603 HNRNPM	0	0	0	0.0362484
chr19:38840559:38841613 HNRNPL	0.00307811	0	0	0.00344637
chr19:38840559:38843842 HNRNPL	-0.0116096	0	0	-0.0142823
chr19:38841682:38843842 HNRNPL	0.0085315	0	0	0.0108359
chr19:41262582:41268223 HNRNPUL1	0	0	-0.0198885	0
chr19:41264692:41268223 HNRNPUL1	0	0	-0.0456582	0
chr19:41264798:41268223 HNRNPUL1	0	0	0.0655467	0
chr19:41279176:41281163 HNRNPUL1	0	0	0	-0.00314308
chr19:41279176:41292245 HNRNPUL1	0	0	0	-0.0371286
chr19:41281275:41292245 HNRNPUL1	0	0	0	0.0402716
chr7:26174782:26185199 HNRNPA2B1	0.00225761	0	0.00128598	0.00320105
chr7:26174782:26190993 HNRNPA2B1	0.000389151	0	0.00111101	0.00138302
chr7:26174782:26192495 HNRNPA2B1	0.00613876	0	0.00619904	0.00954515
chr7:26190460:26190993 HNRNPA2B1	-0.0373926	0	-0.0194353	0.00185333
chr7:26190460:26191056 HNRNPA2B1	0.00961666	0	0.0101385	0.0176952
chr7:26191128:26191422 HNRNPA2B1	-0.001992	0	-0.00539554	0.00207072
chr7:26191128:26192495 HNRNPA2B1	0.0141008	0	0.00350952	0.0113661
chr7:26191650:26192495 HNRNPA2B1	-0.00141568	0	-0.00106233	0.00440263
chr7:26192338:26192495 HNRNPA2B1	0.00829733	0	0.00364914	-0.0515173
chr7:26197732:26197831 HNRNPA2B1	0	0	0	-0.0464711
chr7:26197732:26200572 HNRNPA2B1	0	0	0	0.0686027
chr7:26197866:26200572 HNRNPA2B1	0	0	0	-0.0221316
chr5:178209447:178210132 HNRNPAB	0	0	0	-0.106154
chr5:178209447:178210553 HNRNPAB	0	0	0	0.0511404
chr5:178210272:178210553 HNRNPAB	0	0	0	0.0550135
chr5:179614959:179615546 HNRNPH1	0.0241188	0	0.0289254	0.135561
chr5:179614959:179616126 HNRNPH1	-0.0486103	0	-0.0545284	-0.245873
chr5:179615595:179616126 HNRNPH1	0.0244916	0	0.025603	0.110312
chr5:179616218:179616869 HNRNPH1	0.110279	0	0.130845	0.34907
chr5:179616218:179617021 HNRNPH1	-0.110279	0	-0.130845	-0.34907
chr5:179618323:179619269 HNRNPH1	-0.015626	0	-0.0120629	0.0109037
chr5:179618323:179620892 HNRNPH1	-0.0269971	0	-0.0269927	-0.0751397
chr5:179619407:179620892 HNRNPH1	0.0426231	0	0.0390556	0.0642361
chr5:179621397:179621843 HNRNPH1	-0.0117055	0	-0.0187628	-0.0351036
chr5:179621397:179623037 HNRNPH1	0.0258701	0	0.0342435	0.0740072
chr5:179621976:179623037 HNRNPH1	-0.0141645	0	-0.0154807	-0.0389036
chr4:82357444:82358659 HNRNPD	-0.0134401	0	0	-0.022947
chr4:82357444:82373446 HNRNPD	-0.00384306	0	0	-0.0109026
chr4:82358820:82359471 HNRNPD	-0.000473315	0	0	0.0215478
chr4:82358820:82373446 HNRNPD	-0.00839902	0	0	-0.0277862
chr4:82359639:82371528 HNRNPD	0.0124705	0	0	0.0399034
chr4:82359639:82373446 HNRNPD	-0.00930997	0	0	-0.0371209
chr4:82371584:82373446 HNRNPD	0.0234886	0	0	0.0376974
chr4:82354154:82354895 HNRNPD	0	0	-0.0333013	-0.055652
chr4:82354154:82355304 HNRNPD	0	0	0.0673578	0.162062
chr4:82355001:82355304 HNRNPD	0	0	-0.0340565	-0.10641
chr4:82355401:82356537 HNRNPD	0	0	0	0.0691335
chr4:82355401:82356796 HNRNPD	0	0	0	-0.103665
chr4:82356683:82356796 HNRNPD	0	0	0	0.0345311
chr4:82424883:82425563 HNRNPDL	-0.0499847	0	-0.0480543	-0.122547
chr4:82424883:82426037 HNRNPDL	0.216031	0	0.195265	0.477301
chr4:82425667:82426037 HNRNPDL	-0.166047	0	-0.147211	-0.354755
chr4:82428179:82428278 HNRNPDL	0	0	0	0.0104638
chr4:82428201:82428278 HNRNPDL	0	0	0	-0.0104638
chr2:177212805:177215539 HNRNPA3	0.0586887	0	0.0602248	0.104299
chr2:177212871:177215539 HNRNPA3	-0.0586887	0	-0.0602248	-0.104299
chr2:177219314:177219408 HNRNPA3	0	0	0.0666589	0.0722627
chr2:177219314:177222060 HNRNPA3	0	0	-0.0670571	-0.104648
chr2:177221976:177222060 HNRNPA3	0	0	0.000398152	0.0323853
chr1:23321663:23323556 HNRNPR	0	0	0	-0.000130248
chr1:23321663:23333518 HNRNPR	0	0	0	-0.0192606
chr1:23323732:23333518 HNRNPR	0	0	0	0.010465
chr1:23323732:23337754 HNRNPR	0	0	0	0.000547867
chr1:23333631:23337754 HNRNPR	0	0	0	0.00837792
chr1:23338608:23340852 HNRNPR	0	0	0	0.0427875
chr1:23338608:23344211 HNRNPR	0	0	0	-0.0555529
chr1:23341017:23344211 HNRNPR	0	0	0	0.0179052
chr1:23341020:23344211 HNRNPR	0	0	0	-0.00513979
chr1:244846706:244847002 HNRNPU	0	0	0	-0.00798023
chr1:244846706:244848788 HNRNPU	0	0	0	-0.00414307
chr1:244846706:244854382 HNRNPU	0	0	0	0.00123713
chr1:244847101:244848788 HNRNPU	0	0	0	-0.00861258
chr1:244848856:244854219 HNRNPU	0	0	0	0.00183554
chr1:244848856:244854318 HNRNPU	0	0	0	-0.00214505
chr1:244848856:244854382 HNRNPU	0	0	0	0.0062707
chr1:244848856:244854973 HNRNPU	0	0	0	0.00486098
chr1:244854503:244854973 HNRNPU	0	0	0	0.00867657
chr1:244862730:244863617 HNRNPU	0	0	0	-0.102413
chr1:244862730:244863674 HNRNPU	0	0	0	0.102413
chr9:83970804:83970897 HNRNPK	0.0108911	0	0	0.0177387
chr9:83970819:83970897 HNRNPK	-0.0108911	0	0	-0.0177387
chr9:83971356:83971672 HNRNPK	-0.00586608	0	0	-0.0115365
chr9:83971356:83971882 HNRNPK	-0.00208548	0	0	-0.001967
chr9:83971726:83971882 HNRNPK	0.00795156	0	0	0.0135035
chr9:83973399:83973902 HNRNPK	0.0220608	0	0.0258338	0.0784609
chr9:83973399:83974517 HNRNPK	-0.0512279	0	-0.0363434	-0.19021
chr9:83973973:83974517 HNRNPK	0.0291671	0	0.0105096	0.111749
chr9:83974589:83975462 HNRNPK	0	0	0	-0.00597938
chr9:83974589:83976995 HNRNPK	0	0	0	-0.0121319
chr9:83975505:83976995 HNRNPK	0	0	0	0.0181113
chr9:83978327:83980503 HNRNPK	0	0	0	-0.0433993
chr9:83978452:83979601 HNRNPK	0	0	0	0.000942393
chr9:83978452:83980119 HNRNPK	0	0	0	-0.0761998
chr9:83978452:83980153 HNRNPK	0	0	0	0.139078
chr9:83978452:83980503 HNRNPK	0	0	0	-0.0204215
chr12:120464122:120464733 SRSF9	-0.0359809	0	-0.03753	-0.0345923
chr12:120464122:120465627 SRSF9	0.0412825	0	0.058606	0.0559981
chr12:120464822:120465627 SRSF9	-0.00530159	0	-0.021076	-0.0214059
chr17:58005041:58005398 SRSF1	0	0	0.00072668	0.00602414
chr17:58005041:58005414 SRSF1	0	0	0.0628871	0.12881
chr17:58005041:58005801 SRSF1	0	0	0.0027452	0.00940507
chr17:58005600:58005732 SRSF1	0	0	-0.00652936	0.00160339
chr17:58005600:58005801 SRSF1	0	0	-0.0598296	-0.145843
chr17:76735158:76735772 SRSF2	0	0	0.0837777	0.158027
chr17:76735158:76736154 SRSF2	0	0	-0.117418	-0.287896
chr17:76735875:76736154 SRSF2	0	0	0.0336401	0.129869
chr14:69767251:69768138 SRSF5	0.058003	0	0.0667326	0.16503
chr14:69767255:69768138 SRSF5	0.00220405	0	0.00554229	0.0375932
chr14:69767380:69768138 SRSF5	-0.0544213	0	-0.0629106	-0.186351
chr14:69767987:69768138 SRSF5	-0.00578574	0	-0.00936428	-0.0162726
chr14:69769251:69769511 SRSF5	-0.144225	0	-0.127691	-0.407361
chr14:69769251:69770467 SRSF5	0.292486	0	0.199317	0.736878
chr14:69770042:69770467 SRSF5	-0.148261	0	-0.0716254	-0.329517
chr14:69771105:69771194 SRSF5	0.0346692	0	0.0357595	0.079621
chr14:69771105:69771197 SRSF5	-0.0346692	0	-0.0357595	-0.079621
chr20:43458509:43459153 SRSF6	-0.0132884	0	0	-0.0214442
chr20:43458509:43459771 SRSF6	0.17055	0	0	0.275081
chr20:43459420:43459771 SRSF6	-0.157262	0	0	-0.253637
chr2:38733616:38746144 SRSF7	-0.010083	0	0	-0.0320069
chr2:38745187:38746144 SRSF7	0.0142244	0	0	0.03128
chr2:38745187:38746694 SRSF7	0.0134631	0	0	0.0280257
chr2:38746179:38746694 SRSF7	-0.0176045	0	0	-0.0272988
chr1:23967723:23971338 SRSF10	0.00486065	0	0.00377785	0.0127912
chr1:23967723:23971573 SRSF10	-0.0153432	0	-0.0256208	-0.0336238
chr1:23967723:23971850 SRSF10	-0.00855669	0	-0.00370824	-0.0417914
chr1:23967956:23971573 SRSF10	-0.0309742	0	-0.0393061	-0.11033
chr1:23967956:23971850 SRSF10	0	0	0	-0.0123158
chr1:23971439:23971573 SRSF10	0.0691503	0	0.0974703	0.162094
chr1:23971623:23971850 SRSF10	-0.0160908	0	-0.0033489	-0.00289987
chr1:23971626:23971850 SRSF10	-0.00304609	0	-0.0292641	0.0260755
chr1:29149226:29150103 SRSF4	0	0	0	0.0343119
chr1:29149226:29154696 SRSF4	0	0	0	-0.0274252
chr1:29150192:29154696 SRSF4	0	0	0	-0.00688677
chr1:29160517:29165890 SRSF4	0	0	0	0.0800299
chr1:29160517:29181646 SRSF4	0	0	0	-0.0939477
chr1:29168638:29181646 SRSF4	0	0	0	0.0139177
chr1:70221839:70228422 SRSF11	0	0	0	-0.0101173
chr1:70222798:70228422 SRSF11	0	0	0	0.0101173
chr1:70228555:70229210 SRSF11	0.000160739	0	-0.001948	0.00873077
chr1:70228555:70230557 SRSF11	-0.000650996	0	-0.0041268	0.00266223
chr1:70228555:70231095 SRSF11	-0.0021309	0	-0.00379886	0.00302487
chr1:70228555:70231859 SRSF11	-0.00962692	0	-0.0194823	0.00135757
chr1:70228555:70232268 SRSF11	-0.175071	0	-0.16516	-0.512832
chr1:70230618:70231095 SRSF11	0.122916	0	0.0867626	0.206055
chr1:70231194:70231859 SRSF11	0.00588606	0	0.00794752	0.00955872
chr1:70231203:70231859 SRSF11	-0.0113676	0	0.0199515	0.046765
chr1:70231975:70232268 SRSF11	0.0698847	0	0.0798542	0.234678
chr1:70246907:70247117 SRSF11	0.0149778	0	0.0129576	0.0205625
chr1:70246907:70249931 SRSF11	0.00735511	0	0.00460389	0.00563589
chr1:70246907:70249952 SRSF11	-0.0418156	0	-0.0324893	-0.0479412
chr1:70247149:70249952 SRSF11	0.0194827	0	0.0149278	0.0217427
chr1:70250503:70250608 SRSF11	0.0482894	0	0.0602045	0.116739
chr1:70250503:70250611 SRSF11	-0.0482894	0	-0.0602045	-0.116739
chr16:31185179:31186802 FUS	0.0224139	0	0.00642619	0.0554338
chr16:31185179:31188325 FUS	-0.0554923	0	-0.0255222	-0.108237
chr16:31186836:31188325 FUS	0.0330784	0	0.019096	0.0528031
chr17:35809576:35817716 TAF15	0	0	0	0.0436236
chr17:35809576:35820024 TAF15	0	0	0	-0.0174491
chr17:35810063:35817716 TAF15	0	0	0	2.65723e-05
chr17:35817755:35820024 TAF15	0	0	0	-0.0262011
chr17:35820075:35820164 TAF15	0	0	0.0301249	0.05677
chr17:35820075:35820332 TAF15	0	0	-0.0270243	-0.104549
chr17:35820239:35820332 TAF15	0	0	-0.0110094	-0.0364861
chr17:35820248:35820332 TAF15	0	0	0.0079088	0.0842646
chr17:35824198:35833907 TAF15	0.0310235	0	0	0.0804807
chr17:35824198:35834566 TAF15	-0.0413612	0	0	-0.154136
chr17:35833941:35834566 TAF15	0.0103377	0	0	0.0736557
chr22:29273864:29274265 EWSR1	0.0276785	0	0.0282283	0.0632803
chr22:29273864:29274268 EWSR1	-0.0114363	0	-0.0100187	-0.0197311
chr22:29273864:29278030 EWSR1	-0.0607007	0	-0.0731041	-0.127054
chr22:29274282:29278030 EWSR1	0.0444585	0	0.0548945	0.0835049
chr22:29278216:29282390 EWSR1	0	0	0	-0.03841
chr22:29278216:29286923 EWSR1	0	0	0	0.00975267
chr22:29282557:29286923 EWSR1	0	0	0	0.0286573
chr22:29288786:29291562 EWSR1	0.0193737	0	0.0193972	0.0594604
chr22:29288786:29291565 EWSR1	-0.00891127	0	-0.0194307	0.0204377
chr22:29288786:29292137 EWSR1	-0.0223133	0	-0.0227986	-0.100733
chr22:29291599:29292137 EWSR1	0.0118508	0	0.022832	0.0208351
chr22:29298895:29299195 EWSR1	0	0	0	-0.0275713
chr22:29298895:29299234 EWSR1	0	0	0	0.0275713
chr22:29299280:29299599 EWSR1	0	0	0	0.0161756
chr22:29299331:29299599 EWSR1	0	0	0	-0.0161756
chr2:70215494:70216208 TIA1	0	0	0.00603903	0.069584
chr2:70215494:70216404 TIA1	0	0	-0.0137834	-0.133018
chr2:70216292:70216404 TIA1	0	0	0.00774442	0.0634342
chr2:70227822:70228344 TIA1	0.0314657	0	0.0208858	0.0437342
chr2:70227822:70229059 TIA1	0.0482967	0	0.0166825	0.0369139
chr2:70227822:70229264 TIA1	-0.185132	0	-0.130461	-0.212616
chr2:70228462:70229059 TIA1	0.00507277	0	0.0143095	-0.00302488
chr2:70228462:70229264 TIA1	-0.00574333	0	0.00435312	-0.00238827
chr2:70229091:70229264 TIA1	0.10604	0	0.0742295	0.137381
chr10:110297728:110298648 SMNDC1	0	0	0.0293972	0.0609783
chr10:110297745:110298648 SMNDC1	0	0	-0.0293972	-0.0609783

## Sheet: SuppTable5
#	Site/Affiliations	PI Name	Preferred Email
1	Center for Genomics of Neurodegenerative Diseases (CGND), New York Genome Center, New York, NY	Hemali Phatnani, PhD	hphatnani@nygenome.org
2	Department of Neurology, University of Maryland School of Medicine, University of Maryland ALS Clinic, Baltimore, MD	Justin Kwan, MD	jkwan@som.umaryland.edu
3	Cedars-Sinai Department of Biomedical Sciences, Board of Governors Regenerative Medicine Institute and Brain Program, Cedars-Sinai Medical Center, and Department of Medicine, University of California, Los Angeles, CA	Dhruv Sareen, PhD	Dhruv.Sareen@cshs.org
4	Department of Biochemistry and Molecular Biology, Penn State Institute for Personalized Medicine, The Pennsylvania State University, Hershey, PA	James R. Broach, PhD	jbroach@hmc.psu.edu
5	Department of Neurology, The Pennsylvania State University, Hershey, PA	Zachary Simmons, MD	zsimmons@psu.edu
6	Department of Neurology, Henry Ford Health System, Detroit, MI	Ximena Arcila-Londono, MD	Xarcila1@hfhs.org
7	Department of Pathology and Laboratory Medicine, Perelman School of Medicine, University of Pennsylvania, Philadelphia, PA	Edward B. Lee, MD, PhD	edward.lee@uphs.upenn.edu
8	Department of Pathology and Laboratory Medicine, Perelman School of Medicine, University of Pennsylvania, Philadelphia, PA	Vivianna M. Van Deerlin, MD, PhD	vivianna@upenn.edu
9	Department of Neurology, Center for Motor Neuron Biology and Disease, Institute for Genomic Medicine, Columbia University, New York, NY	Neil A. Shneider, MD, PhD	ns327@cumc.columbia.edu
10	Department of Biological Engineering, Massachusetts Institute of Technology, Cambridge, MA	Ernest Fraenkel, PhD	fraenkel-admin@mit.edu
11	Department of Neurology, Johns Hopkins School of Medicine, Baltimore, MD	Lyle W. Ostrow, MD, PhD	lostrow1@jhmi.edu
12	Department of Neurogenetics, Academic Medical Centre, Amsterdam and Leiden University Medical Center, Leiden, The Netherlands	Frank Baas, MD, PhD	F.Baas@lumc.nl
13	Department of Medicine, Lung Biology Center, University of California, San Francisco, CA	Noah Zaitlen, PhD	Noah.zaitlen@ucsf.edu
14	ALS Multidisciplinary Clinic, Neuromuscular Division, Department of Neurology, Harvard Medical School, and Neurological Clinical Research Institute, Massachusetts General Hospital, Boston, MA	James D. Berry, MD, MPH	jdberry@mgh.harvard.edu
15	Centre for Neuroscience and Trauma, Blizard Institute, Barts and The London School of Medicine and Dentistry, Queen Mary University of London, London, and Department of Neurology, Basildon University Hospital, Basildon, United Kingdom	Andrea Malaspina, MD, PhD	a.malaspina@qmul.ac.uk
16	Institute of Neurology, National Hospital for Neurology and Neurosurgery, University College London, London, United Kingdom	Pietro Fratta, MD, PhD	p.fratta@ucl.ac.uk
17	The Jackson Laboratory, Bar Harbor, ME	Gregory A. Cox, PhD	greg.cox@jax.org
18	Department of Psychiatry & Human Behavior, Department of Biological Chemistry, School of Medicine, and Department of Neurobiology and Behavior, School of Biological Sciences, University California, Irvine, CA	Leslie M. Thompson, PhD	lmthomps@uci.edu
19	Taube/Koret Center for Neurodegenerative Disease Research, Roddenberry Center for Stem Cell Biology and Medicine, Gladstone Institute	Steve Finkbeiner, MD, PhD	steve.finkbeiner@gladstone.ucsf.edu
20	Department of Neurology & Sensory Organs, University of Thessaly, Thessaly, Greece	Efthimios Dardiotis, MD, PhD	edar@med.uth.gr
21	Department of Neurology ,Washington University in St. Louis, St. Louis, MO	Timothy M. Miller, MD, PhD	millert@neuro.wustl.edu
22	Centre for Clinical Brain Sciences, Anne Rowling Regenerative Neurology Clinic, Euan MacDonald Centre for Motor Neurone Disease Research, University of Edinburgh, Edinburgh, United Kingdom	Siddharthan Chandran, PhD	siddharthan.chandran@ed.ac.uk
23	Centre for Clinical Brain Sciences, Anne Rowling Regenerative Neurology Clinic, Euan MacDonald Centre for Motor Neurone Disease Research, University of Edinburgh, Edinburgh, United Kingdom	Suvankar Pal, MD	Suvankar.Pal@ed.ac.uk
24	Department of Molecular Genetics, Weizmann Institute of Science, Rehovot, Israel	Eran Hornstein, MD, PhD	eran.hornstein@weizmann.ac.il
25	Department of Neurology, Icahn School of Medicine at Mount Sinai, New York, NY	Daniel J. MacGowan, MD	Daniel.MacGowan@mountsinai.org
26	Center for Neurodegenerative Disorders, Department of Neurology, the Lewis Katz School of Medicine, Temple University, Philadelphia, PA	Terry Heiman-Patterson, MD	Terry.Heiman-Patterson@tuhs.temple.edu
27	Cold Spring Harbor Laboratory, Cold Spring Harbor, NY	Molly G. Hammell, PhD	mhammell@cshl.edu
28	Computer Science and Systems Biology Program, Ann Romney Center for Neurological Diseases, Department of Neurology and Division of Genetics in Department of Medicine, Brigham and Women’s Hospital, Boston, MA, Harvard Medical School, Boston, MA, and Program in Medical and Population Genetics, Broad Institute, Cambridge, MA	Nikolaos. A. Patsopoulos, MD, PhD	npatsopoulos@rics.bwh.harvard.edu
29	Department of Anesthesiology, Stony Brook University, Stony Brook, NY	Joshua Dubnau, PhD	joshua.dubnau@stonybrook.edu
30	Section of Infections of the Nervous System, National Institute of Neurological Disorders and Stroke, NIH, Bethesda, MD	Avindra Nath, MD	natha@ninds.nih.gov
