# Supplementary figures and images for: Unexpected similarities between C9ORF72 and sporadic forms of ALS/FTD suggest a common disease mechanism
Source: eLife journal article supplement (doi:10.7554/elife.37754), 2018-07-13

Figure 2 Fig. Supp. 1

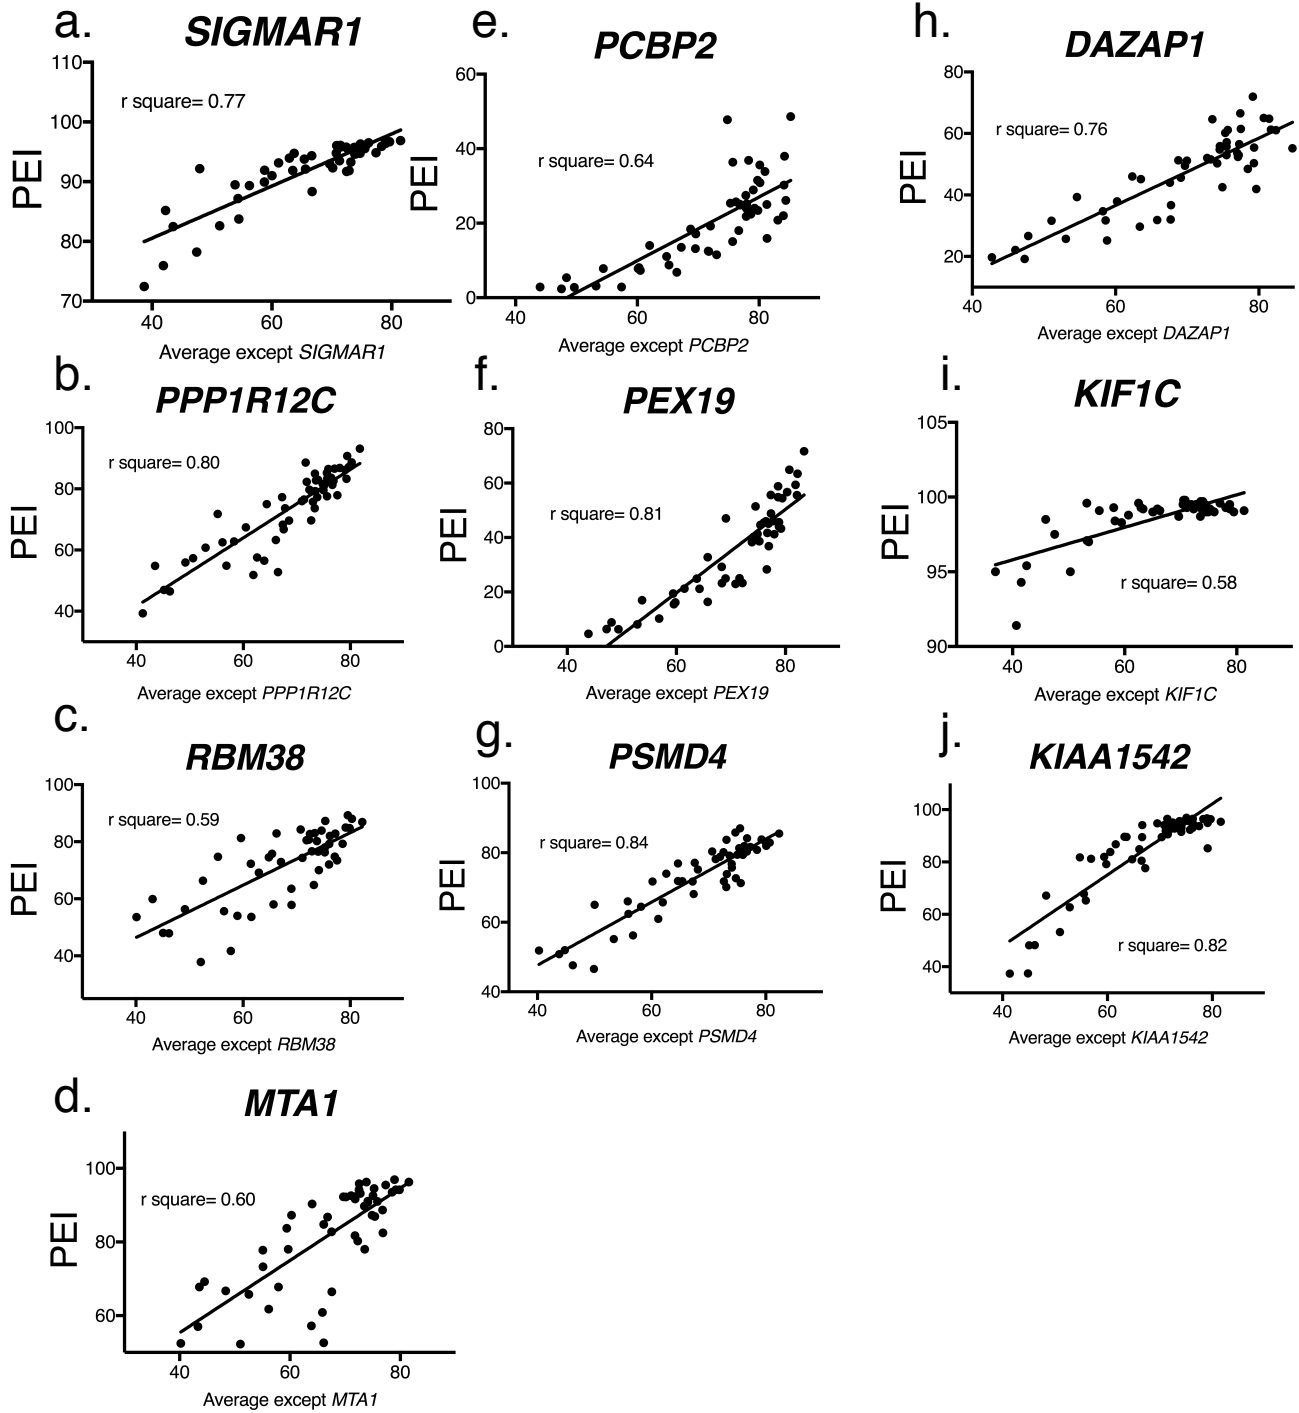

Supplement: supp [file elife-37754-supp-v1.zip › elife_poa_e37754_Figure_2_figure_supplement_1.pdf]

Figure 6 Fig. Supp. 5

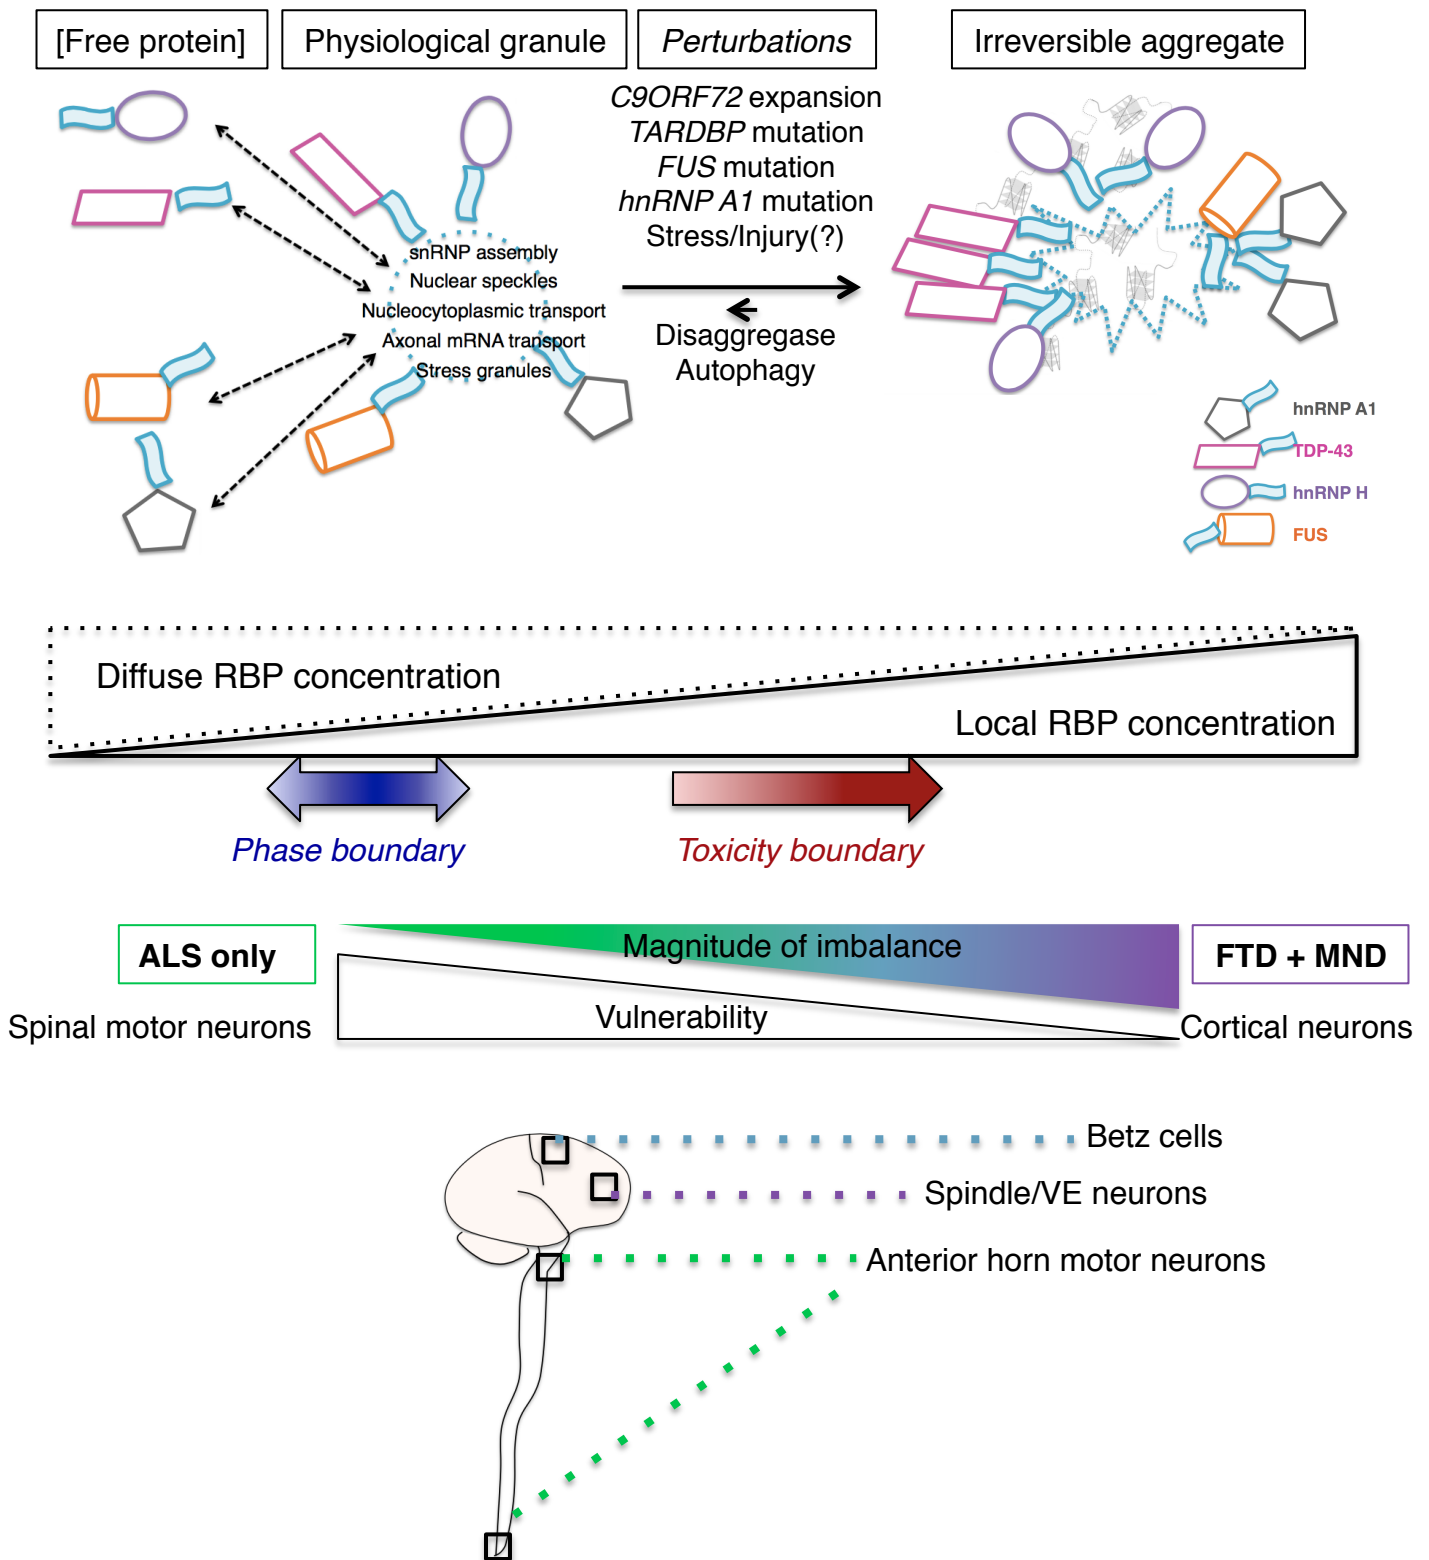

Supplement: supp [file elife-37754-supp-v1.zip › elife_poa_e37754_Figure_6_figure_supplement_5.pdf]

Figure 4 Fig. Supp. 1

nonALS  
SOD1ALS  
C9ALS

1 2 3 4 6 7 23 39 1 2 3 4 5 6 8 10 11 12 13 14 15

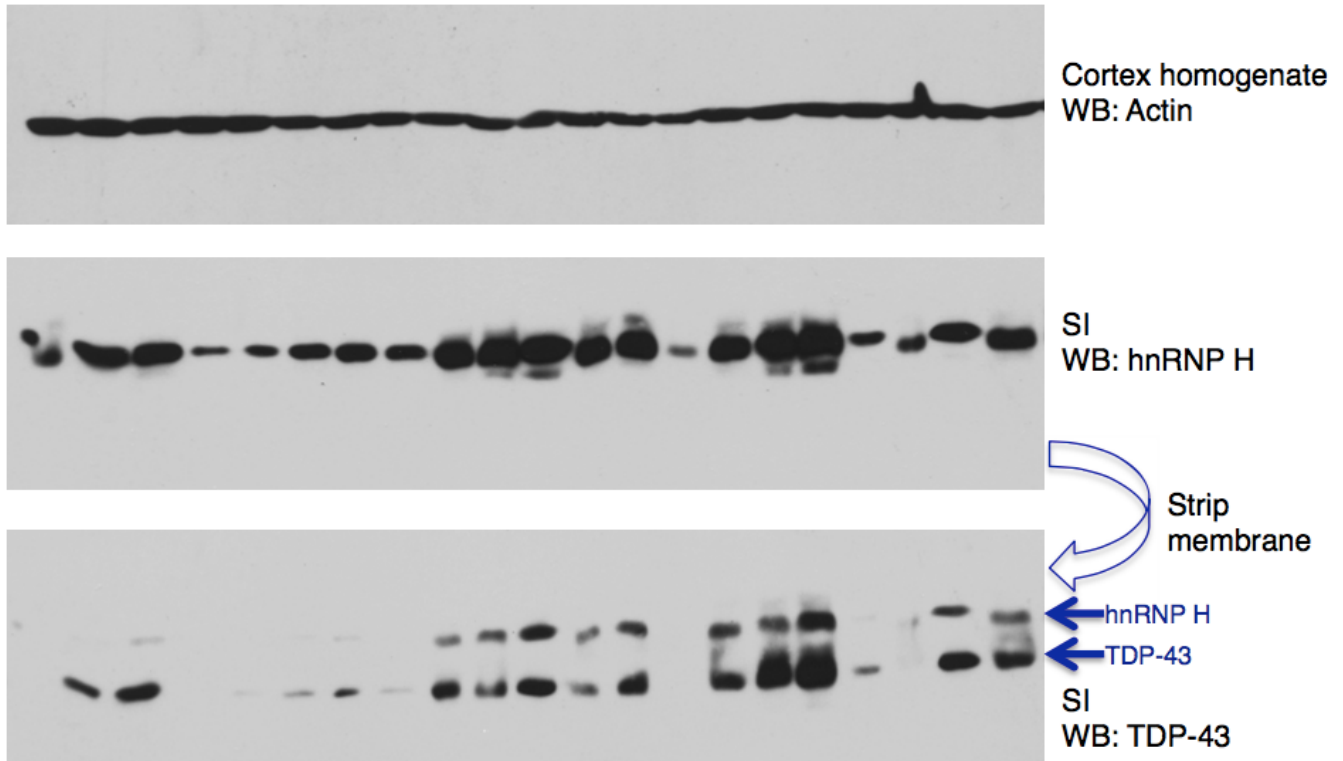

Supplement: supp [file elife-37754-supp-v1.zip › elife_poa_e37754_Figure_4_figure_supplement_1.pdf]

Figure 6 Fig. Supp. 3

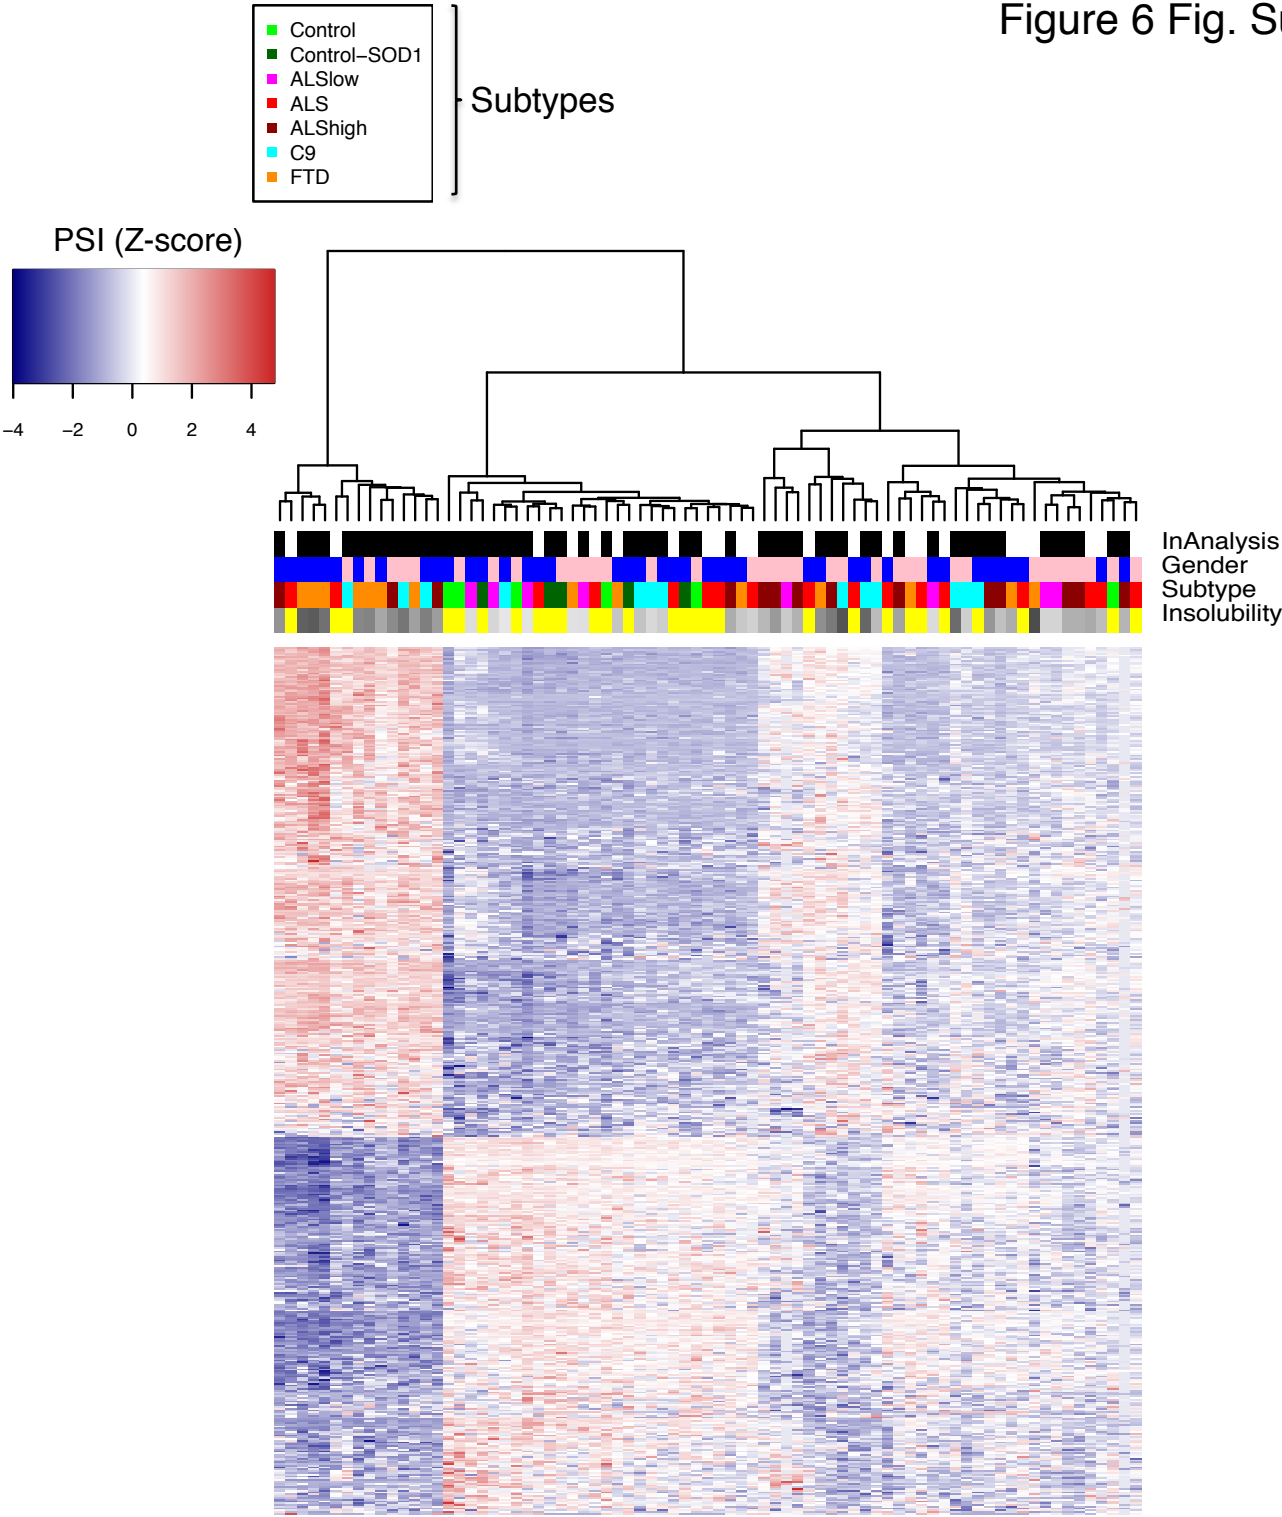

Supplement: supp [file elife-37754-supp-v1.zip › elife_poa_e37754_Figure_6_figure_supplement_3.pdf]

Figure 4 Fig. Supp. 2

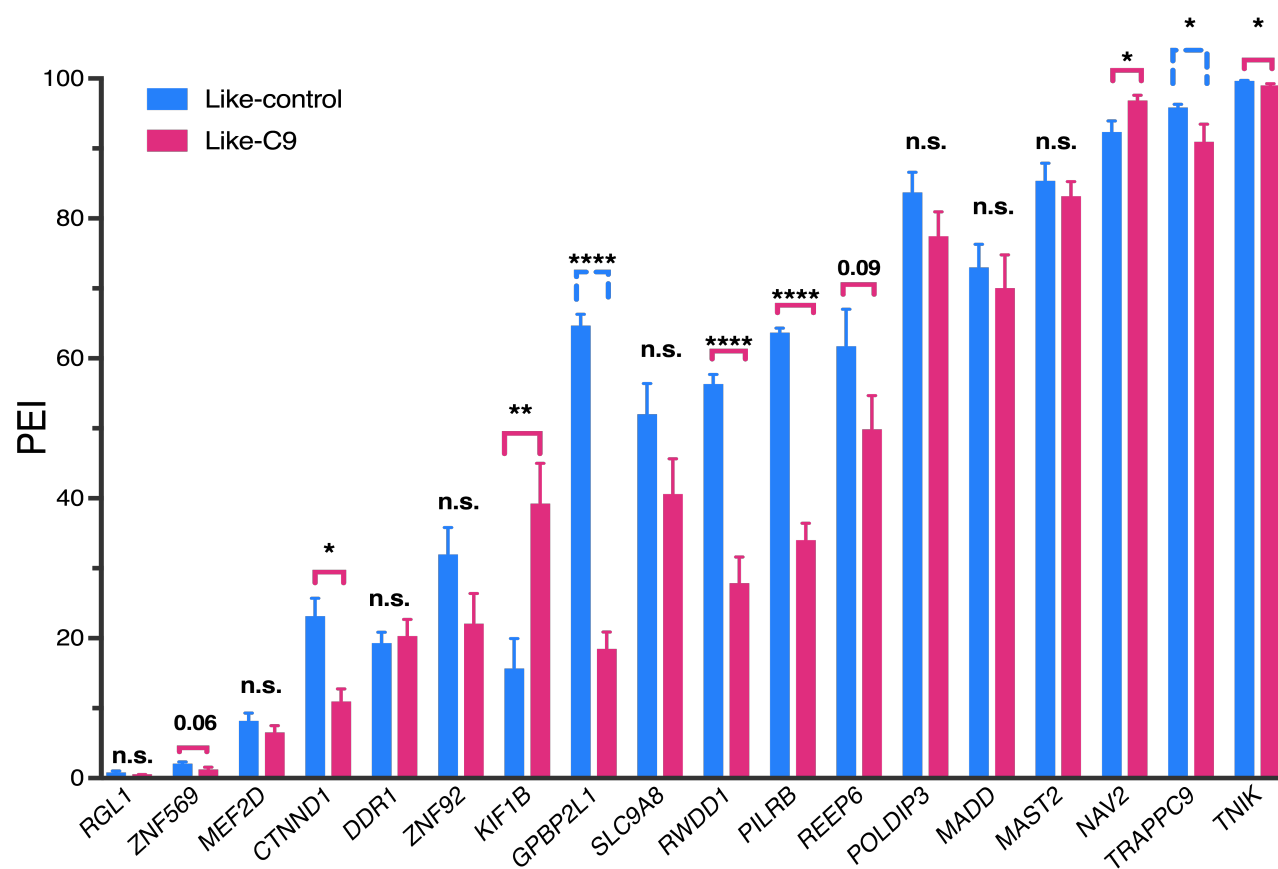

Supplement: supp [file elife-37754-supp-v1.zip › elife_poa_e37754_Figure_4_figure_supplement_2.pdf]

Figure 6 Fig. Supp. 4

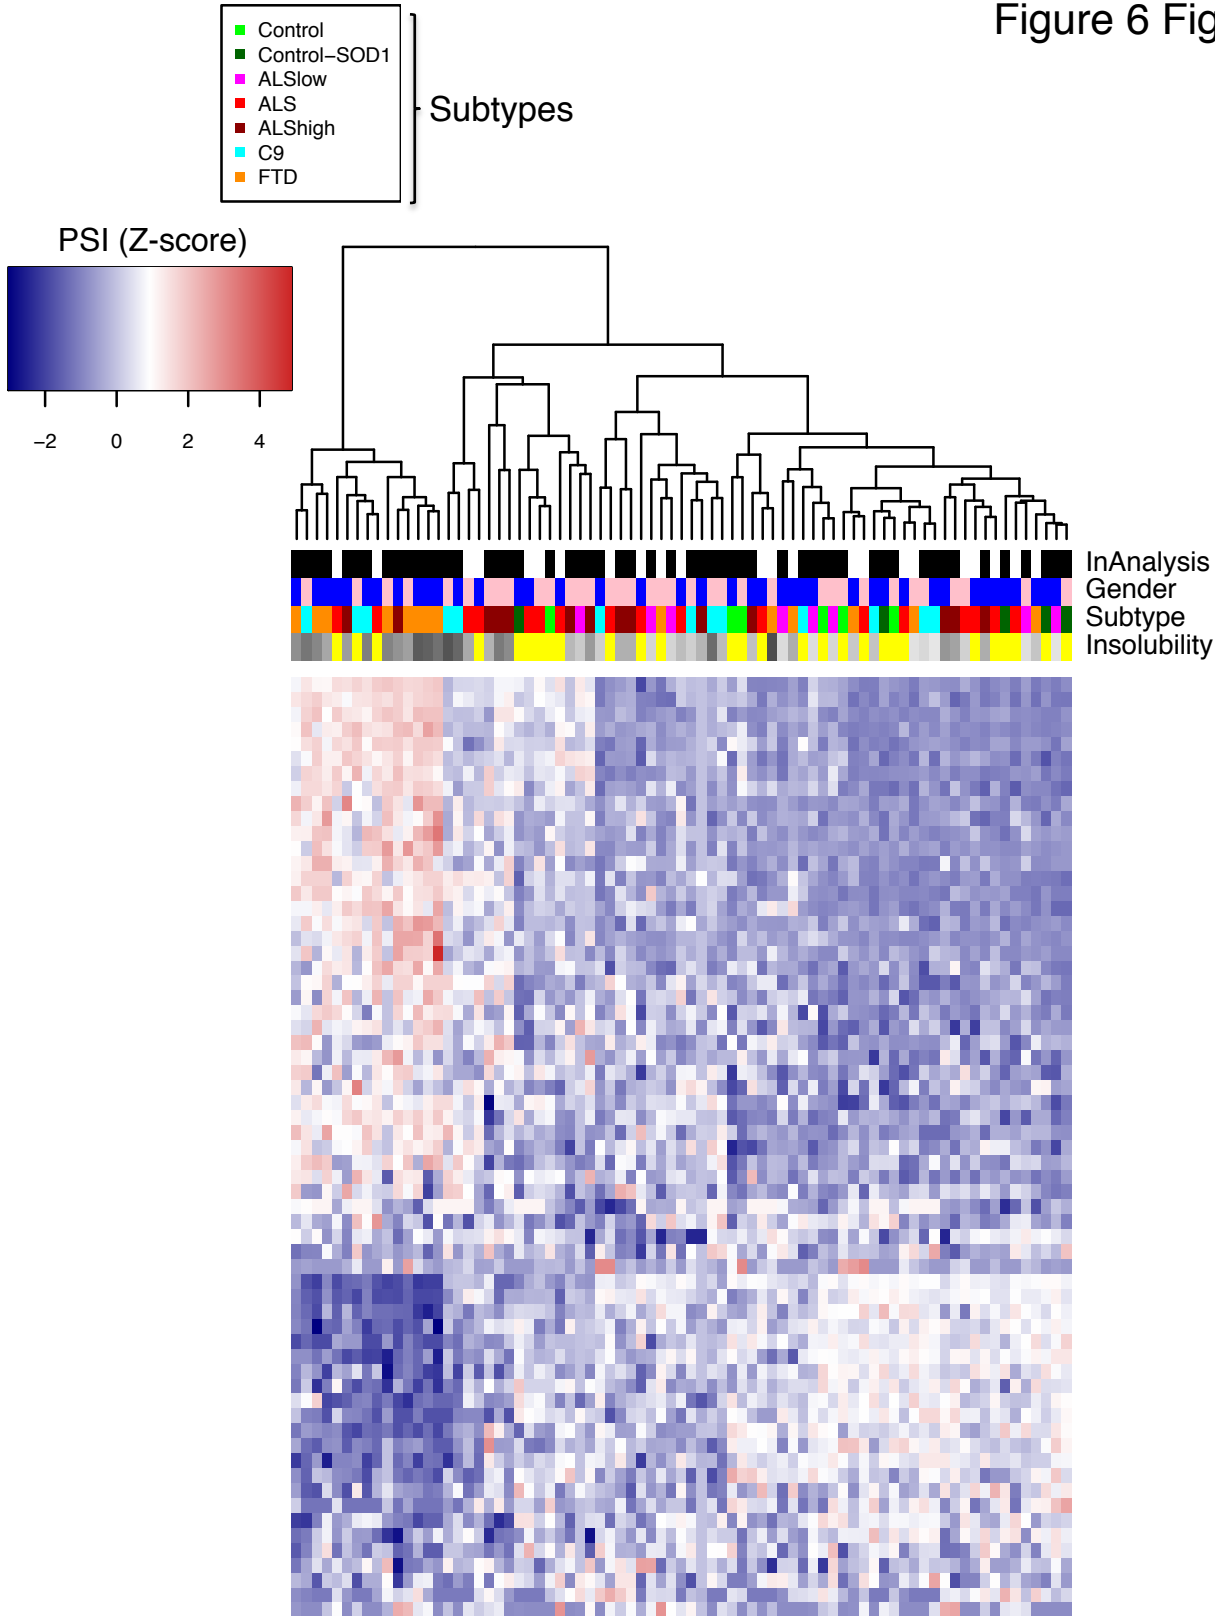

Supplement: supp [file elife-37754-supp-v1.zip › elife_poa_e37754_Figure_6_figure_supplement_4.pdf]

Figure 1 Fig. Supp. 1

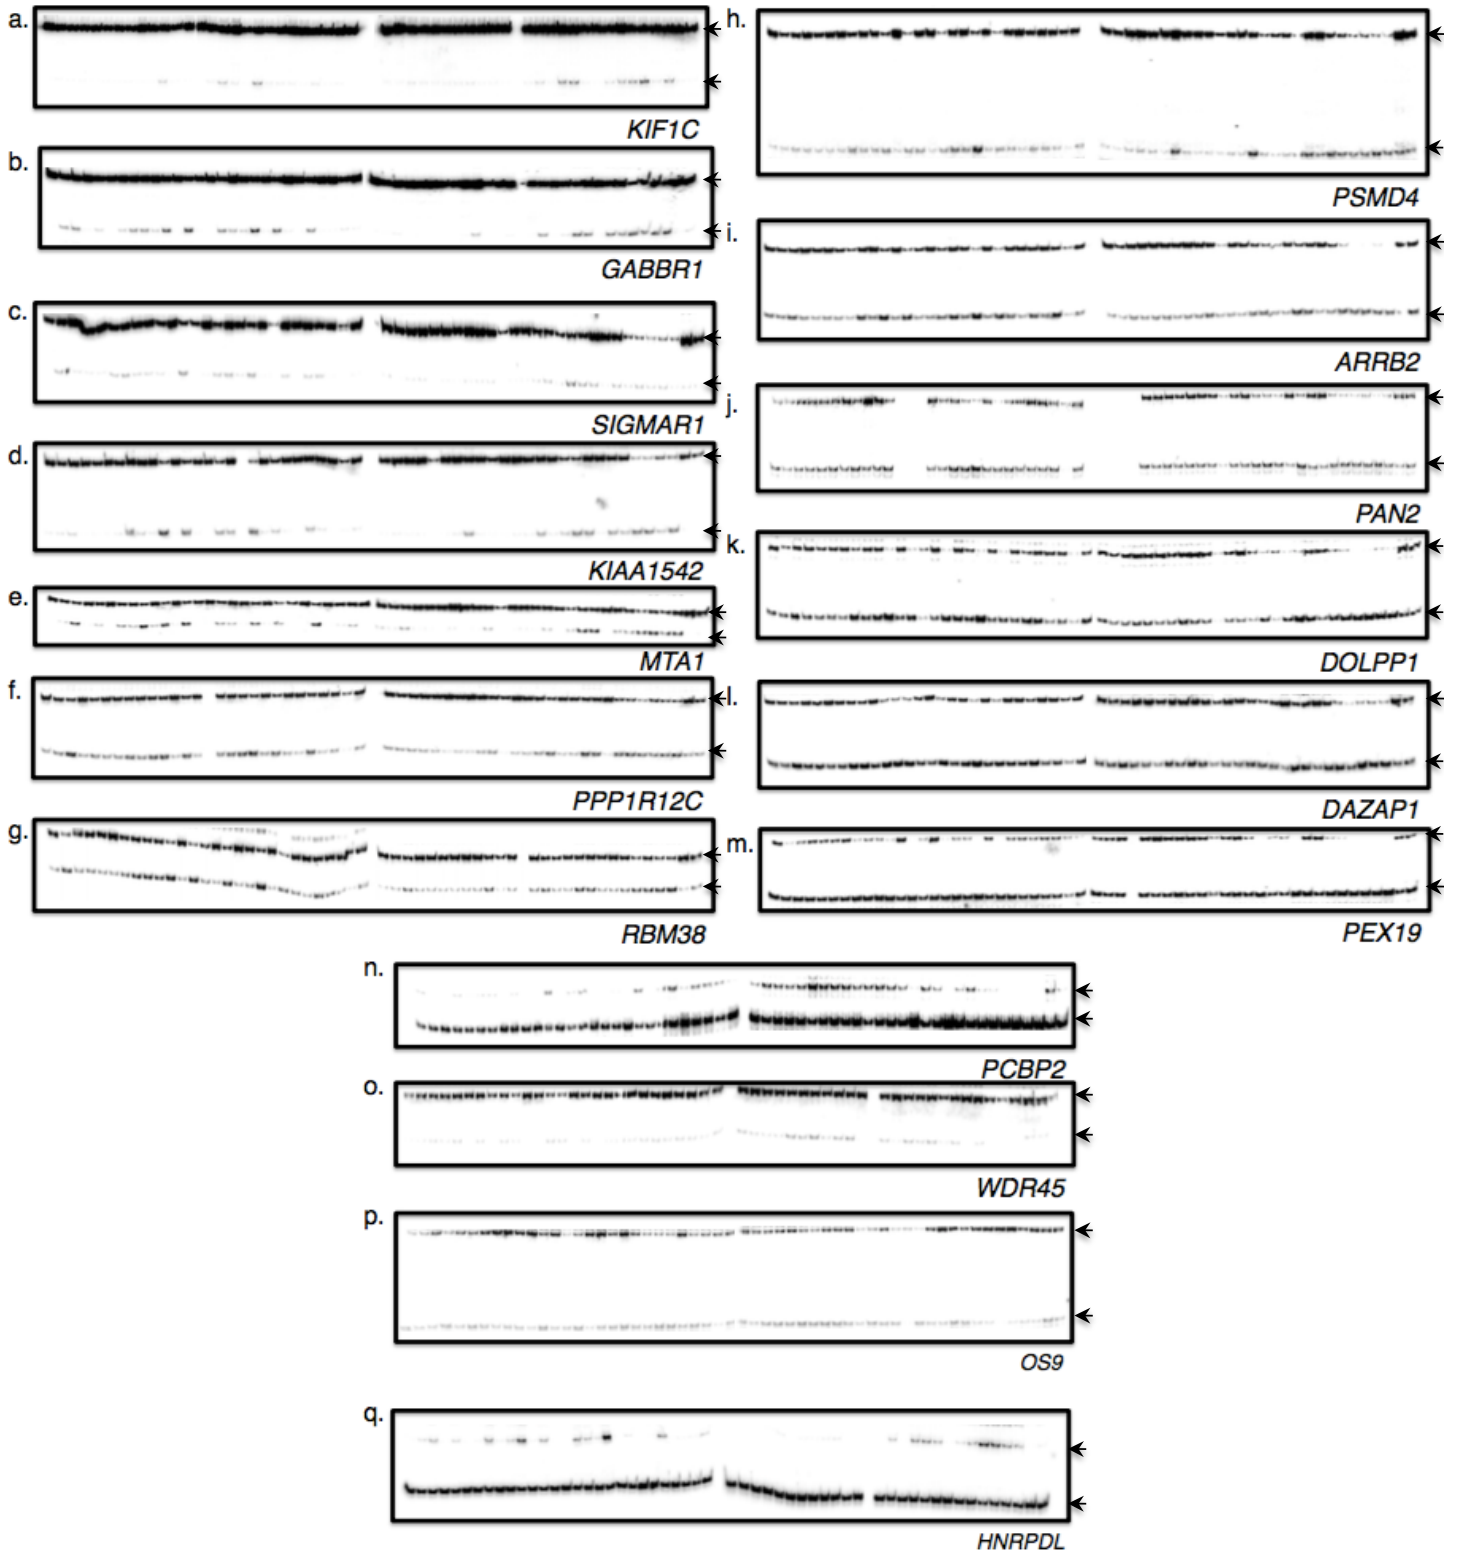

Supplement: supp [file elife-37754-supp-v1.zip › elife_poa_e37754_Figure_1_figure_supplement_1.pdf]

Figure 5 Fig. Supp. 1

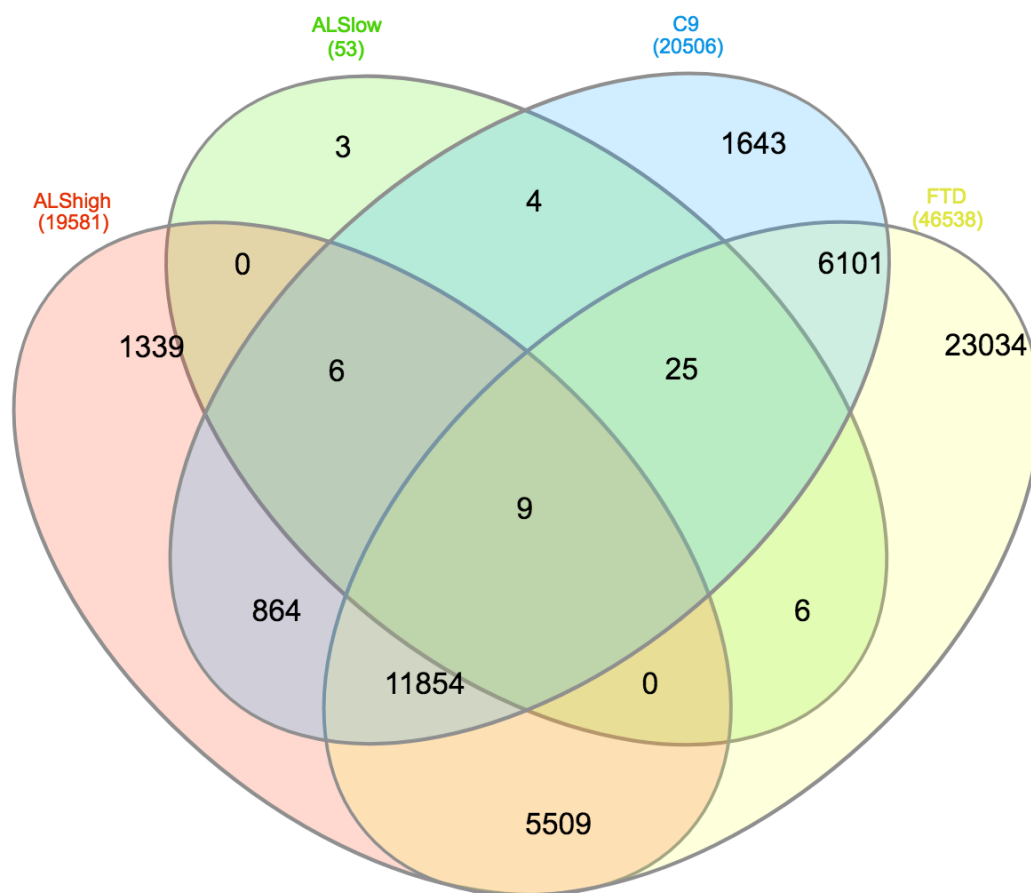

Supplement: supp [file elife-37754-supp-v1.zip › elife_poa_e37754_Figure_5_figure_supplement_1.pdf]
